# Supplementary material for: Double C–N bond cleavages of N-alkyl 4-oxopiperidinium salts: access to unsymmetrical tertiary sulfonamides
Source: Royal Society of Chemistry journal article supplement (doi:10.1039/c9ob02107h), 2019-01-01
Supplement: c9ob02107h1.pdf [file c9ob02107h1.pdf]

## **Double C-N Bond Cleavages of N-Alkyl 4-Oxopiperidinium Salts: Access to Unsymmetrical Tertiary Sulfonamides**

Ying Fu,<sup>\*a</sup> Ming-Peng Li,<sup>a</sup> Chun-Zhao Shi,<sup>a</sup> Fang-Rong Li,<sup>b</sup> Zhengyin Du<sup>\*a</sup> and Congde Huo<sup>\*a</sup>

<sup>a</sup> College of Chemistry and Chemical Engineering, Northwest Normal University, Lanzhou, Gansu, 730070, China.

<sup>b</sup> Pharmacy Department, Gansu University of Traditional Chinese Medicine, 743000, China.

### **Table of Contents:**

|                                             |    |
|---------------------------------------------|----|
| 1. General Experimental Information .....   | 2  |
| 2. Details of experimental procedures.....  | 2  |
| 3. Mechanism screenings .....               | 3  |
| 4. Compound characterization data.....      | 5  |
| 5. Copies of NMR spectra of compounds ..... | 19 |

## 1. General Experimental Information

**Analytic methods.** All reactions were carried out under air atmosphere.  $^1\text{H}$  NMR and  $^{13}\text{C}$  NMR spectra were recorded on a Varian Mercury 400 MHz spectrometer or a Bruker 600 MHz spectrometer with  $\text{CDCl}_3$  as solvent. Chemical shifts of  $^1\text{H}$  NMR and  $^{13}\text{C}$  NMR spectra are reported in parts per million (ppm) with TMS as an internal standard. Data are reported as follows: chemical shift, integration, multiplicity (s = singlet, d = doublet, t = triplet, q = quartet, quint = quintet, sx = sextet, sept = septet, m = multiplet and br = broad), and coupling constant ( $J$ ) are in Hz. High resolution mass spectra (HRMS (ESI)) were performed using a 6520B Q-TOF high-resolution mass spectrometer. Column chromatography was performed on silica gel 300-400 mesh. Analytical thin layer chromatography (TLC) was performed on pre-coated, glass-backed silica gel plates. All reagents were purchased from commercial sources and were used as thus.

## 2. Details of experimental procedures

### 2.1 General procedure for the syntheses of compounds 3

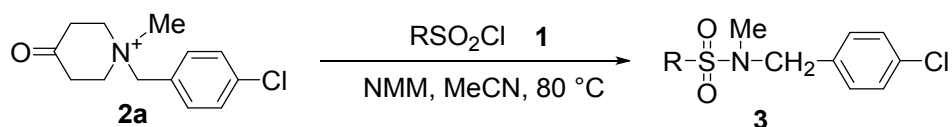

In a 10 mL test tube were charged with sulfonyl chloride **1** (0.5 mmol), N-(4-chlorobenzyl)-N-methyl-4-oxopiperidin-1-ium chloride **2** (165 mg, 0.6 mmol), N-methylmorpholine (165 mg, 1.5 mmol) and acetonitrile (2.0 mL). The reaction mixtures were heated to 80 °C under air for 4h. Upon completion (TLC) and after cooling to ambient temperature, the reaction mixture was dissolved in ethyl acetate (10 mL) and washed successively with water (2×10 mL) and then brine (10 mL). The aqueous phase was further extracted with ethyl acetate (10 mL) and washed as previously. The organic phase was combined, dried over  $\text{Na}_2\text{SO}_4$  and concentrated. Purification by silica gel column chromatography gave desired sulfonamide products **3**.

### 2.2 General procedure for the syntheses of compounds 5

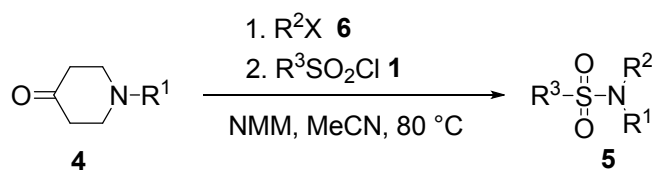

In a 10 mL test tube were charged with N-substituted 4-piperidinone **4** (0.6 mmol), organohalide **6** (0.6 mmol) and MeCN (2 mL). The reaction mixtures were stirred at 50 °C for 24h. Upon completion (TLC), N-methylmorpholine (165 mg, 1.5 mmol) and sulfonyl chloride (0.5 mmol) were added and the reaction mixtures were heated to 80 °C under air for 4 h. After cooling to ambient temperature, the reaction mixture was dissolved in ethyl acetate (10 mL) and washed successively with water (2×10 mL) and then brine (10 mL). The aqueous phase was further extracted with ethyl acetate (10 mL) and washed as previously. The organic phase was combined, dried over Na<sub>2</sub>SO<sub>4</sub> and concentrated. Purification by silica gel column chromatography gave desired sulfonamide products **5**.

### 3. Mechanism screenings

#### 3.1 Decomposition of TsCl in the presence of N-methylmorpholine

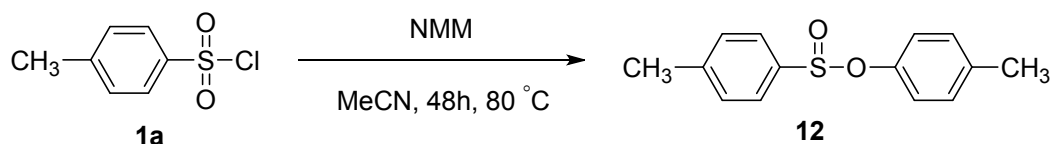

4-Methylbenzenesulfonyl chloride (191 mg, 1.0 mmol) and N-Methylmorpholine (152 mg, 1.5 mmol) were heated in MeCN (2 mL) to 80 °C under air for 48 h to yield **12** in 14.6% (18 mg) yield.

<sup>1</sup>H NMR (400 MHz, CDCl<sub>3</sub>) δ (ppm): 7.46 (d, *J* = 8.0 Hz, 2H), 7.23 (m, 4H), 7.14 (d, *J* = 8.0 Hz, 2H), 2.42 (s, 3H), 2.38 (s, 3H).

<sup>13</sup>C NMR (101 MHz, CDCl<sub>3</sub>) δ (ppm): 144.4, 141.9, 140.3, 136.3, 130.0, 129.2, 127.4, 124.4, 21.5, 21.3.

HRMS (ESI) *m/z*: Calcd for C<sub>14</sub>H<sub>14</sub>O<sub>2</sub>NaS [M+Na]<sup>+</sup> 269.06067; Found 269.06067.

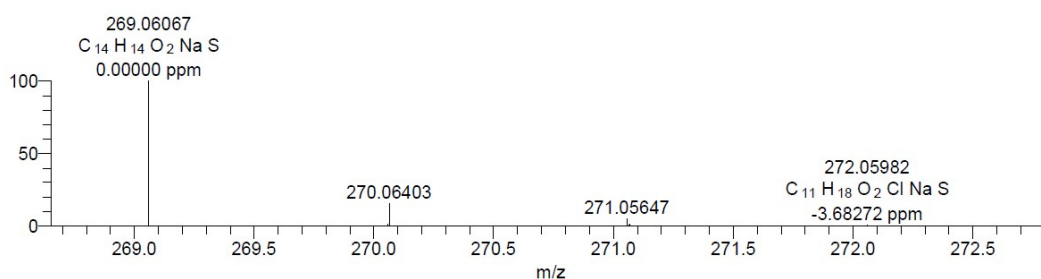

#### 3.2 Trapping radicals with TEMPO

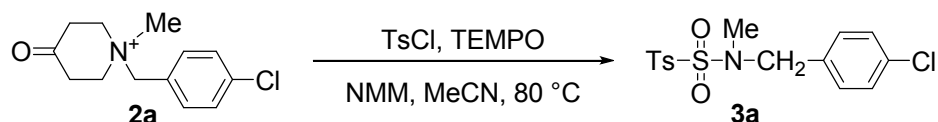

A solution of 4-methylbenzenesulfonyl chloride (95 mg, 0.5 mmol), 1-(4-chlorobenzyl)-1-methyl-4-oxopiperidin-1-ium chloride (163.5 mg, 0.6 mmol), N-Methylmorpholine (151 mg, 1.5 mmol) and TEMPO (156 mg, 1.0 mmol) in CH<sub>3</sub>CN (2.0 mL) were heated to 80 °C under air for 4 h. Then the reaction solution was submitted to HRMS examination. The main radical species or intermediates that are detected by HRMS analysis are listed below.

**(1) 5-((2,2,6,6-tetramethylpiperidin-1-yl)oxy)pent-1-en-3-one (10)**

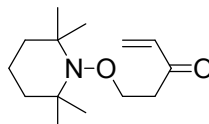

**HRMS (ESI)  $m/z$ :** Calcd for C<sub>14</sub>H<sub>26</sub>O<sub>2</sub>N [M+H]<sup>+</sup> 240.19581; Found 240.19580.

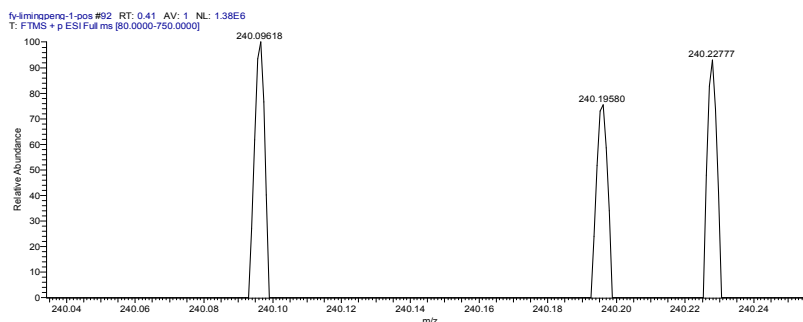

**(2) 2,2,6,6-tetramethylpiperidin-1-yl 4-methylbenzenesulfonate (11)**

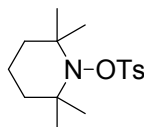

**HRMS (ESI)  $m/z$ :** Calcd for C<sub>16</sub>H<sub>26</sub>NO<sub>3</sub>S [M+H]<sup>+</sup> 312.16279; Found 312.16223.

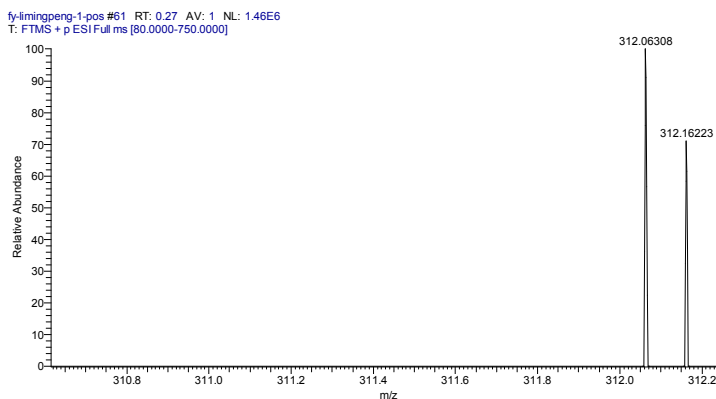

Compound **11** was also isolated from above reaction system as a main product in 42% isolated yield.

$^1\text{H NMR}$  (600 MHz,  $\text{CDCl}_3$ )  $\delta$  (ppm): 7.48 (d,  $J = 8.0$  Hz, 2H), 7.12 (d,  $J = 7.8$  Hz, 2H), 2.29 (s, 3H), 1.72-1.62 (m, 2H), 1.57-1.49 (m, 4H), 1.34 (s, 12H).

$^{13}\text{C NMR}$  (151 MHz,  $\text{DMSO-}d_6$ )  $\delta$  (ppm): 145.5, 138.4, 128.6, 125.9, 56.1, 34.6, 27.1, 21.2, 16.3.

### (3) 1-(4-Chlorophenyl)-N-methylmethanamine (V)

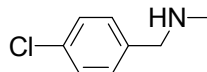

**HRMS (ESI)  $m/z$ :** calcd for  $\text{C}_8\text{H}_{11}\text{NClNa}$   $[\text{M}+\text{Na}]^+$  178.03940; Found 178.0389.

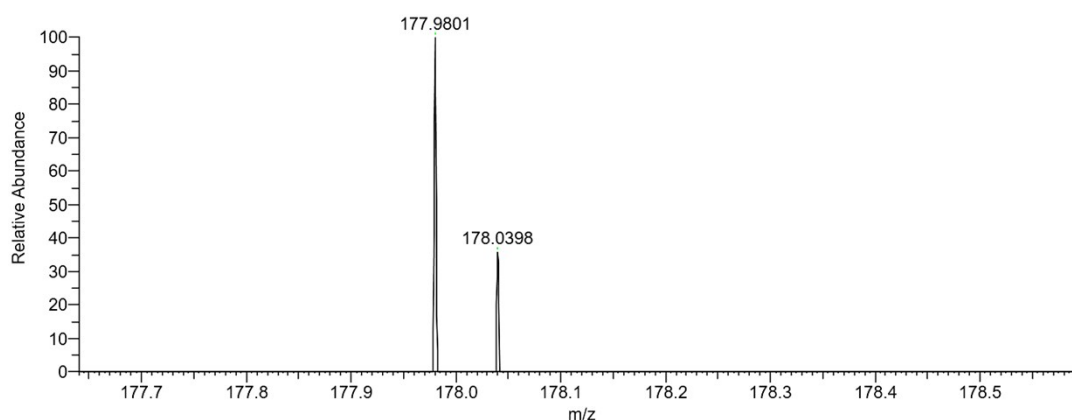

## 4. Compound characterization data

### *N*-(4-Chlorobenzyl)-*N*,4-dimethylbenzenesulfonamide (3a)

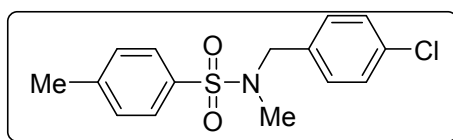

The reaction of 4-methylbenzenesulfonyl chloride (95 mg, 0.5 mmol), 1-(4-chlorobenzyl)-1-methyl-4-oxopiperidin-1-ium chloride (163.5 mg, 0.6 mmol) and *N*-Methylmorpholine (151 mg, 1.5 mmol) in MeCN (2 mL) affords **3a** in 76% (117 mg) yield. White solid; Mp: 82 - 84 °C.

$^1\text{H NMR}$  (600 MHz,  $\text{CDCl}_3$ )  $\delta$  (ppm): 7.71 (d,  $J = 7.8$  Hz, 2H), 7.35 (d,  $J = 8.4$  Hz, 2H), 7.30 (d,  $J = 8.4$  Hz, 2H), 7.24 (d,  $J = 8.4$  Hz, 2H), 4.09 (s, 2H), 2.58 (s, 3H), 2.45 (s, 3H).

$^{13}\text{C NMR}$  (101 MHz,  $\text{CDCl}_3$ )  $\delta$  (ppm): 143.9, 134.5, 134.4, 133.9, 130.0, 129.9, 129.0, 127.7, 53.7, 34.6, 21.8.

**HRMS (ESI)  $m/z$ :** Calcd for  $\text{C}_{15}\text{H}_{16}\text{O}_2\text{NClNaS}$   $[\text{M}+\text{Na}]^+$  332.04880; Found 332.04868.

### *N*-(4-Chlorobenzyl)-*N*-methylbenzenesulfonamide (3b)

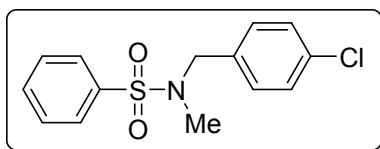

The reaction of benzenesulfonyl chloride (87.5 mg, 0.5 mmol), 1-(4-chlorobenzyl)-1-methyl-4-oxopiperidin-1-ium chloride (327.6 mg, 1.2 mmol) and N-Methylmorpholine (151 mg, 1.5 mmol) in MeCN (2 mL) affords **3b** in 71% (104 mg) yield. White solid; Mp: 61 - 63 °C.

**<sup>1</sup>H NMR** (600 MHz, CDCl<sub>3</sub>) δ (ppm): 7.86 – 7.82 (m, 2H), 7.64 – 7.62 (m, 1H), 7.58 – 7.56 (m, 2H), 7.31 (d, *J* = 8.4 Hz, 2H), 7.25 (d, *J* = 8.4 Hz, 2H), 4.12 (s, 2H), 2.60 (s, 3H).

**<sup>13</sup>C NMR** (151 MHz, CDCl<sub>3</sub>) δ (ppm): 137.3, 134.2, 133.8, 132.8, 129.6, 129.2, 128.8, 127.4, 53.5, 34.4.

**HRMS (ESI) *m/z***: Calcd for C<sub>14</sub>H<sub>14</sub>O<sub>2</sub>NCINaS [M+Na]<sup>+</sup> 318.03260; Found 318.03262.

#### ***N*-(4-Chlorobenzyl)-2,4,6-triisopropyl-*N*-methylbenzenesulfonamide (3c)**

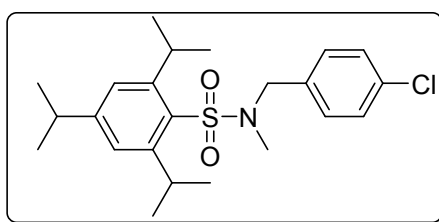

The reaction of 2,4,6-triisopropylbenzenesulfonyl chloride (151 mg, 0.5 mmol), 1-(4-chlorobenzyl)-1-methyl-4-oxopiperidin-1-ium chloride (327.6 mg, 1.2 mmol) and N-Methylmorpholine (151 mg, 1.5 mmol) in MeCN (2 mL) affords **3c** in 45% (94 mg) yield. White solid; Mp: 127 - 128 °C.

**<sup>1</sup>H NMR** (600 MHz, CDCl<sub>3</sub>) δ (ppm): 7.30 (d, *J* = 8.4 Hz, 2H), 7.24 (d, *J* = 8.4 Hz, 2H), 7.19 (s, 2H), 4.33 (s, 2H), 4.24 – 4.18 (m, 2H), 3.01 – 2.76 (m, 1H), 2.57 (s, 3H), 1.26 (dd, *J* = 4.2, 3.6 Hz, 18H).

**<sup>13</sup>C NMR** (600 MHz, CDCl<sub>3</sub>) δ (ppm): 153.3, 151.6, 134.3, 133.7, 130.4, 130.1, 128.7, 123.9, 51.4, 34.2, 33.0, 29.4, 24.8, 23.5.

**HRMS (ESI) (*ESI*) *m/z***: Calcd for C<sub>23</sub>H<sub>33</sub>O<sub>2</sub>NCIS [M+H]<sup>+</sup> 422.19150; Found 422.19150.

#### ***N*-(4-Chlorobenzyl)-*N*,2,2,4,6,7-hexamethyl-2,3-dihydrobenzofuran-5-sulfonamide (3d)**

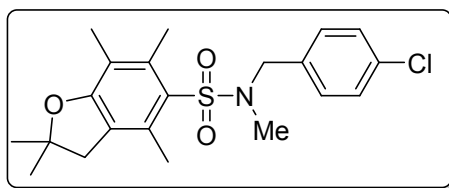

The reaction of 2,2,4,6,7-pentamethyl-2,3-dihydrobenzofuran-5-sulfonyl chloride (144 mg, 0.5 mmol), 1-(4-chlorobenzyl)-1-methyl-4-oxopiperidin-1-ium chloride (327.6 mg, 1.2 mmol) and N-Methylmorpholine (151 mg, 1.5 mmol) in MeCN (2 mL) affords **3d** in 73% (148 mg) yield. White solid; Mp: 124 - 126 °C.

**<sup>1</sup>H NMR** (600 MHz, CDCl<sub>3</sub>) δ (ppm): 7.28(d, *J* = 8.4 Hz, 2H), 7.16 (d, *J* = 8.4 Hz, 2H), 4.23 (s, 2H), 2.99 (s, 2H), 2.58 (s, 3H), 2.55 (s, 3H), 2.51 (s, 3H), 2.13 (s, 3H), 1.49 (s, 6H).

**<sup>13</sup>C NMR** (151 MHz, CDCl<sub>3</sub>) δ (ppm): 160.1, 140.8, 135.4, 134.7, 133.6, 129.9, 128.7, 125.9, 125.2, 118.2, 86.9, 52.0, 43.2, 32.6, 28.5, 19.3, 17.7, 12.5.

**HRMS (ESI) *m/z***: Calcd for C<sub>21</sub>H<sub>27</sub>O<sub>3</sub>NCIS [M+H]<sup>+</sup> 408.13947; Found 408.13858.

#### ***N*-(4-Chlorobenzyl)-4-methoxy-*N*-methylbenzenesulfonamide (3e)**

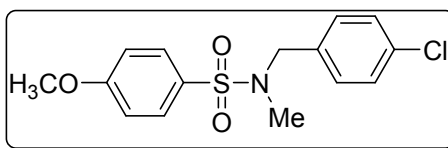

The reaction of 4-methoxybenzenesulfonyl chloride (103 mg, 0.5 mmol), 1-(4-chlorobenzyl)-1-methyl-4-oxopiperidin-1-ium chloride (327.6 mg, 1.2 mmol) and N-Methylmorpholine (151 mg, 1.5 mmol) in MeCN (2 mL) affords **3e** in 80% (130 mg) yield. White solid; Mp: 132 - 134 °C.

**<sup>1</sup>H NMR** (600 MHz, CDCl<sub>3</sub>) δ (ppm): 7.77 (d, *J* = 8.4 Hz, 2H), 7.30 (d, *J* = 8.4 Hz, 2H), 7.24 (d, *J* = 8.4 Hz, 2H), 7.02 (d, *J* = 9.0 Hz, 2H), 4.08 (s, 2H), 3.89 (s, 3H), 2.57 (s, 3H).

**<sup>13</sup>C NMR** (151 MHz, CDCl<sub>3</sub>) δ (ppm): 163.0, 134.3, 133.7, 129.7, 129.5, 128.8, 114.3, 55.6, 53.5, 34.4 .

**HRMS (ESI) *m/z***: Calcd for C<sub>15</sub>H<sub>17</sub>O<sub>3</sub>NCIS [M+H]<sup>+</sup> 326.06122; Found 326.06107.

#### ***N*-(4-Chlorobenzyl)-*N*-methyl-4-(trifluoromethyl)benzenesulfonamide (3f)**

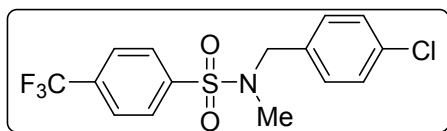

The reaction of 4-(trifluoromethyl)benzenesulfonyl chloride (121 mg, 0.5 mmol), 1-(4-chlorobenzyl)-1-methyl-4-oxopiperidin-1-ium chloride (327.6 mg, 1.2 mmol) and N-Methylmorpholine (151 mg, 1.5 mmol) in MeCN (2 mL) affords **3f** in 55%(100 mg) yield. White solid; Mp: 86 - 88 °C.

**<sup>1</sup>H NMR** (600 MHz, CDCl<sub>3</sub>) δ (ppm): 7.96 (d, *J* = 8.4 Hz, 2H), 7.84 (d, *J* = 8.4 Hz, 2H), 7.33 (d, *J* = 8.4 Hz, 2H), 7.25 (d, *J* = 8.4 Hz, 2H), 4.16 (s, 2H), 2.65 (s, 3H).

**<sup>13</sup>C NMR** (151 MHz, CDCl<sub>3</sub>) δ (ppm): 141.1, 135.2 – 133.1 (m), 129.6, 129.0, 127.8, 126.4 (q, *J* = 3.7 Hz), 124.1, 122.3, 110.0, 53.4, 34.4 .

**<sup>19</sup>F NMR** (376 MHz, CDCl<sub>3</sub>) δ (ppm): -63.52 .

**HRMS (ESI) *m/z***: Calcd for C<sub>16</sub>H<sub>14</sub>NO<sub>4</sub>F<sub>3</sub>ClS [M+HCOO]<sup>-</sup> 408.02842; Found 408.02881.

#### ***N*-(4-Chlorobenzyl)-*N*-methyl-2-(trifluoromethoxy)benzenesulfonamide (3g)**

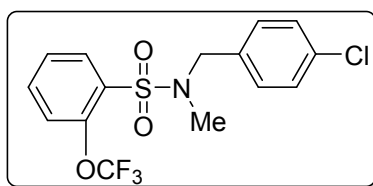

The reaction of 2-(trifluoromethoxy)benzenesulfonyl chloride (130 mg, 0.5 mmol), 1-(4-chlorobenzyl)-1-methyl-4-oxopiperidin-1-ium chloride (163.8 mg, 0.6 mmol) and N-Methylmorpholine (151 mg, 1.5 mmol) in MeCN (2 mL) affords **3g** in 41% (77 mg) yield. Colorless liquid.

**<sup>1</sup>H NMR** (600 MHz, CDCl<sub>3</sub>) δ (ppm): 8.07 (dt, *J* = 7.9, 1.3 Hz, 1H), 7.64 (ddd, *J* = 8.4, 7.4, 1.6 Hz, 1H), 7.47 – 7.40 (m, 2H), 7.31 (d, *J* = 8.2 Hz, 2H), 7.27 – 7.24 (m, 2H), 4.33 (s, 2H), 2.72 (s, 3H).

**<sup>13</sup>C NMR** (151 MHz, CDCl<sub>3</sub>) δ (ppm): 146.1, 134.4 (d, *J* = 6.0 Hz), 133.8, 132.0, 131.2, 129.5, 128.8, 126.5, 121.1, 120.2 (d, *J* = 1.9 Hz), 119.4, 53.2, 34.0 .

**<sup>19</sup>F NMR** (376 MHz, CDCl<sub>3</sub>) δ (ppm): -56.34 .

**HRMS (ESI) *m/z***: Calcd for C<sub>15</sub>H<sub>13</sub>O<sub>3</sub>NCIF<sub>3</sub>NaS [M+Na]<sup>+</sup> 402.01545; Found 402.01499.

#### ***N*-(4-Chlorobenzyl)-4-fluoro-*N*-methylbenzenesulfonamide (3h)**



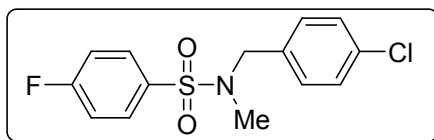

The reaction of 4-fluorobenzenesulfonyl chloride (97 mg, 0.5 mmol), 1-(4-chlorobenzyl)-1-methyl-4-oxopiperidin-1-ium chloride (327.6 mg, 1.2 mmol) and N-Methylmorpholine (151 mg, 1.5 mmol) in MeCN (2 mL) affords **3h** in 55% (86 mg) yield. White solid; Mp: 80 - 82 °C.

**<sup>1</sup>H NMR** (600 MHz, CDCl<sub>3</sub>) δ (ppm): 7.86 – 7.84 (m, 2H), 7.32 (d, *J* = 8.4 Hz, 2H), 7.26 – 7.23 (m, 4H), 4.12 (s, 2H), 2.60 (s, 3H).

**<sup>13</sup>C NMR** (151 MHz, CDCl<sub>3</sub>) δ (ppm): 165.7(d, *J* = 254.9 Hz), 133.9(d, *J* = 4.8 Hz), 130.1, 130.0, 129.6, 128.9, 116.5, 116.4, 53.5, 34.4.

**<sup>19</sup>F NMR** (376 MHz, CDCl<sub>3</sub>) δ (ppm): -103.08 – -109.20 (m).

**HRMS (ESI) *m/z***: Calcd for C<sub>14</sub>H<sub>13</sub>O<sub>2</sub>NCIFNaS [M+Na]<sup>+</sup> 336.02318; Found 336.02358.

#### 4-Chloro-*N*-(4-chlorobenzyl)-*N*-methylbenzenesulfonamide (**3i**)

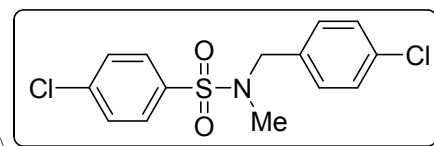

The reaction of 4-chlorobenzenesulfonyl chloride (105 mg, 0.5 mmol), 1-(4-chlorobenzyl)-1-methyl-4-oxopiperidin-1-ium chloride (327.6 mg, 1.2 mmol) and N-Methylmorpholine (151 mg, 1.5 mmol) in MeCN (2 mL) affords **3i** in 53% (87 mg) yield. White solid; Mp: 143 - 144 °C.

**<sup>1</sup>H NMR** (600 MHz, CDCl<sub>3</sub>) δ (ppm): 7.77 (d, *J* = 8.4 Hz, 2H), 7.54 (d, *J* = 8.4 Hz, 2H), 7.32 (d, *J* = 8.4 Hz, 2H), 7.24 (d, *J* = 8.4 Hz, 2H), 4.11 (s, 2H), 2.60 (s, 3H).

**<sup>13</sup>C NMR** (151 MHz, CDCl<sub>3</sub>) δ (ppm): 139.4, 135.9, 133.9, 133.9, 129.6, 129.5, 128.9, 128.8, 53.5, 34.3.

**HRMS (ESI) *m/z***: Calcd for C<sub>14</sub>H<sub>13</sub>O<sub>2</sub>NCl<sub>2</sub> NaS [M+Na]<sup>+</sup> 351.99363; Found 351.99355.

#### 4-Bromo-*N*-(4-chlorobenzyl)-*N*-methylbenzenesulfonamide (**3j**)

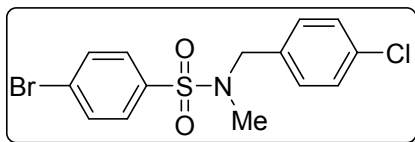

The reaction of 4-bromobenzenesulfonyl chloride (127 mg, 0.5 mmol), 1-(4-chlorobenzyl)-1-methyl-4-oxopiperidin-1-ium chloride (327.6 mg, 1.2 mmol) and N-Methylmorpholine (151 mg, 1.5 mmol) in MeCN (2 mL) affords **3j** in 65% (120 mg) yield. White solid; Mp: 102 - 103 °C.

**<sup>1</sup>H NMR** (600 MHz, CDCl<sub>3</sub>) δ (ppm): 7.71 – 7.68 (m, 4H), 7.32 (d, *J* = 8.4 Hz, 2H), 7.24 (d, *J* = 8.4 Hz, 2H), 4.11 (s, 2H), 2.60 (s, 3H).

**<sup>13</sup>C NMR** (151 MHz, CDCl<sub>3</sub>) δ (ppm): 136.5, 134.0, 133.9, 132.5, 129.7, 128.9, 128.9, 127.8, 53.5, 34.4.

**HRMS (ESI) *m/z***: Calcd for C<sub>14</sub>H<sub>13</sub>O<sub>2</sub>NBrClNaS [M+Na]<sup>+</sup> 395.9437; Found 395.9423.

#### *N*-(4-Chlorobenzyl)-3,4-difluoro-*N*-methylbenzenesulfonamide (**3k**)

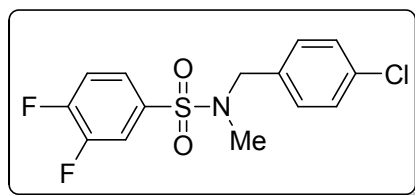

The reaction of 3,4-difluorobenzenesulfonyl chloride (106 mg, 0.5 mmol), 1-(4-chlorobenzyl)-1-methyl-4-oxopiperidin-1-ium chloride (327.6 mg, 1.2 mmol) and N-Methylmorpholine (151 mg, 1.5 mmol) in MeCN (2 mL) affords **3k** in 54%(89 mg) yield. White solid; Mp: 78 - 79 °C.

**<sup>1</sup>H NMR** (600 MHz, CDCl<sub>3</sub>) δ (ppm): 7.35 - 7.37 (m, 2H), 7.32 (d, *J* = 8.4 Hz, 2H), 7.25 – 7.23 (m, 2H), 7.07 (tt, *J* = 8.5, 2.3 Hz, 2H), 4.15 (s, 1H), 2.65 (s, 3H).

**<sup>13</sup>C NMR** (151 MHz, CDCl<sub>3</sub>) δ (ppm): 163.8 (d, *J* = 11.6 Hz), 162.0, 134.1, 133.5, 129.6, 129.0, 110.8 (dd, *J* = 21.5, 6.5 Hz), 108.4 (t, *J* = 25.0 Hz), 53.5, 34.4.

**<sup>19</sup>F NMR** (376 MHz, CDCl<sub>3</sub>) δ (ppm): -105.65 (dd, *J* = 8.5, 5.8 Hz).

**HRMS (ESI) *m/z***: Calcd for C<sub>14</sub>H<sub>12</sub>O<sub>2</sub>NCIF<sub>2</sub>NaS [M+Na]<sup>+</sup> 354.01375; Found 354.01356.

#### *N*-(4-Chlorobenzyl)-*N*-methylnaphthalene-2-sulfonamide (**3n**)

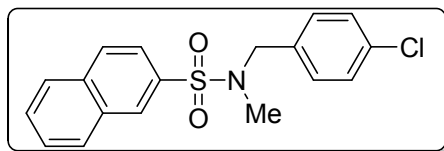

The reaction of naphthalene-2-sulfonyl chloride (113 mg, 0.5 mmol), 1-(4-chlorobenzyl)-1-methyl-4-oxopiperidin-1-ium chloride (327.6 mg, 1.2 mmol) and N-Methylmorpholine (151 mg, 1.5 mmol) in MeCN (2 mL) affords **3n** in 55% (95 mg) yield. White solid; Mp: >200 °C.

**<sup>1</sup>H NMR** (600 MHz, CDCl<sub>3</sub>) δ (ppm): 8.41 (s, 1H), 8.01 (t, *J* = 8.4 Hz, 2H), 7.95 (d, *J* = 7.8 Hz, 1H), 7.82 (dd, *J* = 1.8, 1.8 Hz, 1H), 7.70 – 7.59 (m, 2H), 7.31 (d, *J* = 9.0 Hz, 2H), 7.26 (d, *J* = 9.0 Hz, 2H), 4.18 (s, 2H), 2.65 (s, 3H).

**<sup>13</sup>C NMR** (151 MHz, CDCl<sub>3</sub>) δ (ppm): 139.4, 134.8, 134.4, 134.2, 133.8, 132.3, 129.7, 129.4, 129.2, 128.8, 128.8, 127.9, 127.6, 53.6, 34.4 .

**HRMS (ESI) *m/z***: Calcd for C<sub>18</sub>H<sub>17</sub>O<sub>2</sub>NCIS [M+H]<sup>+</sup> 346.06630; Found 346.06596.

#### ***N*-(4-Chlorobenzyl)-*N*-methylthiophene-2-sulfonamide (3o)**

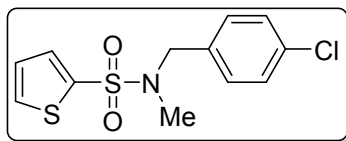

The reaction of thiophene-2-sulfonyl chloride (90 mg, 0.5 mmol), 1-(4-chlorobenzyl)-1-methyl-4-oxopiperidin-1-ium chloride (327.6 mg, 1.2 mmol) and N-Methylmorpholine (151 mg, 1.5 mmol) in MeCN (2 mL) affords **3o** in 45% (67 mg) yield. Yellow viscous oil.

**<sup>1</sup>H NMR** (600 MHz, CDCl<sub>3</sub>) δ (ppm): 7.62 (dd, *J* = 1.2, 1.2 Hz, 1H), 7.45 (dd, *J* = 1.2, 1.8 Hz, 1H), 7.33 (d, *J* = 8.4 Hz, 2H), 7.27 (d, *J* = 6.6 Hz, 2H), 7.15 (dd, *J* = 3.0, 3.6 Hz, 1H), 4.28 (d, *J* = 14.4 Hz, 1H), 4.19 (d, *J* = 14.4 Hz, 1H), 2.60 (s, 3H).

**<sup>13</sup>C NMR** (600 MHz, CDCl<sub>3</sub>) δ (ppm): 146.5, 135.0, 133.6, 131.4, 130.1, 129.7, 128.8, 127.9, 54.4, 32.8.

**HRMS (ESI) *m/z***: Calcd for C<sub>12</sub>H<sub>13</sub>O<sub>2</sub>NCIS<sub>2</sub> [M+H]<sup>+</sup> 302.00707; Found 302.00732.

#### **Methyl 2-(*N*-(4-chlorobenzyl)-*N*-methylsulfamoyl)thiophene-3-carboxylate (3p)**

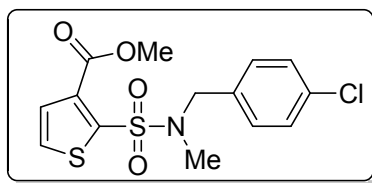

The reaction of methyl 2-(chlorosulfonyl)thiophene-3-carboxylate (120 mg, 0.5 mmol), 1-(4-chlorobenzyl)-1-methyl-4-oxopiperidin-1-ium chloride (327.6 mg, 1.2 mmol) and N-Methylmorpholine (151 mg, 1.5 mmol) in MeCN (2 mL) affords **3p** in 45% (80 mg) yield. White solid; Mp: 107 - 109 °C.

**<sup>1</sup>H NMR** (600 MHz, CDCl<sub>3</sub>) δ (ppm): 7.51 (s, 2H), 7.32 (d, *J* = 8.5 Hz, 2H), 7.27 (d, *J* = 9.6 Hz, 2H), 4.45 (s, 2H), 3.93 (s, 3H), 2.78 (s, 3H).

**<sup>13</sup>C NMR** (151 MHz, CDCl<sub>3</sub>) δ (ppm): 160.0, 141.7, 134.7, 133.7, 131.5, 129.6, 129.1, 128.8, 110.0, 53.7, 53.0, 34.4.

**HRMS (ESI) *m/z***: Calcd for C<sub>14</sub>H<sub>14</sub>O<sub>4</sub>NCINaS<sub>2</sub> [M+Na]<sup>+</sup> 381.9950; Found 381.9945.

***N*-Ethyl-*N*,4-dimethylbenzenesulfonamide (**5a**)**<sup>[1]</sup>

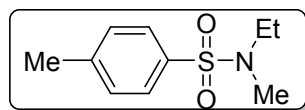

According to general procedure 2.2, **5a** was obtained in 76% (81 mg) isolated yield. White solid; Mp: 28 - 30 °C.

**<sup>1</sup>H NMR** (600 MHz, CDCl<sub>3</sub>) δ (ppm): 7.66 (d, *J* = 8.4 Hz, 2H), 7.31 (d, *J* = 8.4 Hz, 2H), 3.08 (q, *J* = 7.2 Hz, 2H), 2.72 (s, 3H), 2.42 (s, 3H), 1.12 (t, *J* = 7.2 Hz, 3H).

**<sup>13</sup>C NMR** (151 MHz, CDCl<sub>3</sub>) δ (ppm): 143.2, 134.7, 129.6, 127.3, 44.8, 33.9, 21.4, 13.0.

***N*-Allyl-*N*,4-dimethylbenzenesulfonamide (**5b**)**<sup>[2]</sup>

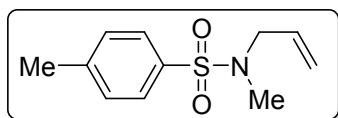

According to general procedure 2.2, **5b** was obtained in 42% (47 mg) yield as a colorless liquid.

**<sup>1</sup>H NMR** (600 MHz, CDCl<sub>3</sub>) δ (ppm): 7.68 (d, *J* = 8.4 Hz, 2H), 7.32 (d, *J* = 7.8 Hz, 2H), 5.86 - 5.61 (m, 1H), 5.22 - 5.13 (m, 2H), 3.63 (d, *J* = 6.6 Hz, 2H), 2.66 (s, 3H), 2.44 (s, 3H).

$^{13}\text{C}$  NMR (151 MHz,  $\text{CDCl}_3$ )  $\delta$  (ppm): 143.3, 134.5, 132.6, 129.6, 127.5, 119.1, 53.0, 34.2, 21.5.

**Ethyl 2-(*N*,4-dimethylphenylsulfonamido)acetate (**5c**)**

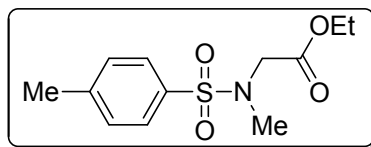

According to general procedure 2.2, **5c** was obtained in 47% (63 mg) yield as a colorless liquid.

$^1\text{H}$  NMR (600 MHz,  $\text{CDCl}_3$ )  $\delta$  (ppm): 7.62 (d,  $J = 7.8$  Hz, 2H), 7.31 (d,  $J = 7.8$  Hz, 2H), 4.18 (qt,  $J = 7.1, 3.6$  Hz, 2H), 3.90 (d,  $J = 17.4$  Hz, 1H), 3.77 (d,  $J = 17.4$  Hz, 1H), 2.71 (s, 3H), 2.41 (s, 3H), 1.27 (t,  $J = 7.2$  Hz, 3H).

$^{13}\text{C}$  NMR (151 MHz,  $\text{CDCl}_3$ )  $\delta$  (ppm): 169.5, 141.4, 140.5, 129.6, 126.4, 61.2, 52.6, 34.5, 21.3, 14.1.

HRMS (ESI)  $m/z$ : Calcd for  $\text{C}_{12}\text{H}_{18}\text{O}_4\text{NS}$   $[\text{M}+\text{H}]^+$  272.09511; Found 272.09481.

***N*,4-Dimethyl-*N*-(2-oxo-2-phenylethyl)benzenesulfonamide (**5d**)<sup>[3]</sup>**

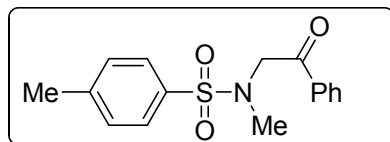

According to general procedure 2.2, **5d** was obtained in 44% (66 mg) isolated yield. Yellowish solid; Mp: 111 - 113 °C.

$^1\text{H}$  NMR (600 MHz,  $\text{CDCl}_3$ )  $\delta$  (ppm): 7.98 (d,  $J = 7.2$  Hz, 2H), 7.73 (d,  $J = 7.8$  Hz, 2H), 7.60 (t,  $J = 7.2$  Hz, 1H), 7.49 (t,  $J = 7.8$  Hz, 2H), 7.33 (d,  $J = 8.4$  Hz, 2H), 4.57 (s, 2H), 2.83 (s, 3H), 2.45 (s, 3H).

$^{13}\text{C}$  NMR (151 MHz,  $\text{CDCl}_3$ )  $\delta$  (ppm): 193.7, 143.6, 134.8, 134.7, 133.8, 129.6, 128.8, 128.3, 127.6, 56.1, 35.6, 21.5.

***N*-Ethyl-4-methyl-*N*-propylbenzenesulfonamide (**5e**)<sup>[4]</sup>**

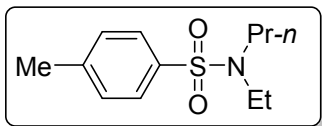

According to general procedure 2.2, **5e** was obtained in 62% (74 mg) isolated yield as a yellowish viscous oil.

**<sup>1</sup>H NMR** (600 MHz, CDCl<sub>3</sub>) δ (ppm): 7.69 (d, *J* = 8.4 Hz, 2H), 7.28 (d, *J* = 8.2 Hz, 2H), 3.19 (q, *J* = 7.2 Hz, 2H), 3.09 – 3.05 (m, 2H), 2.40 (s, 3H), 1.60 – 1.52 (m, 2H), 1.10 (t, *J* = 7.2 Hz, 3H), 0.89 (t, *J* = 7.4 Hz, 3H).

**<sup>13</sup>C NMR** (151 MHz, CDCl<sub>3</sub>) δ (ppm): 142.8, 137.3, 129.5, 127.0, 49.3, 42.6, 22.0, 21.4, 14.1, 11.1.

***N,N*-Diethyl-4-methylbenzenesulfonamide (**5f**)**<sup>[5]</sup>

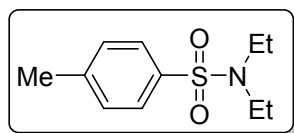

According to general procedure 2.2, **5f** was obtained in 72% (81 mg) isolated yield. White solid; Mp: 59 - 61 °C.

**<sup>1</sup>H NMR** (600 MHz, CDCl<sub>3</sub>) δ (ppm): 7.69 (d, *J* = 7.8 Hz, 2H), 7.29 (d, *J* = 7.8 Hz, 2H), 3.22 (q, *J* = 7.2 Hz, 4H), 2.41 (s, 3H), 1.12 (t, *J* = 7.2 Hz, 6H).

**<sup>13</sup>C NMR** (151 MHz, CDCl<sub>3</sub>) δ (ppm): 142.9, 137.4, 129.5, 127.0, 42.0, 21.4, 14.1.

***N*-(4-Chlorobenzyl)-*N*-ethyl-4-methylbenzenesulfonamide (**5g**)**

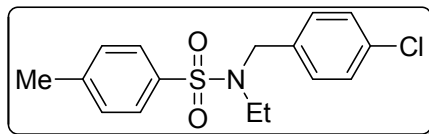

According to general procedure 2.2, **5g** was obtained in 46% (74 mg) isolated yield. White solid; Mp: 56 - 58 °C.

**<sup>1</sup>H NMR** (600 MHz, CDCl<sub>3</sub>) δ (ppm): 7.72 (d, *J* = 7.8 Hz, 2H), 7.32 (d, *J* = 8.4 Hz, 2H), 7.29 (d, *J* = 8.4 Hz, 2H), 7.25 (d, *J* = 8.4 Hz, 1H), 4.29 (s, 2H), 3.18 (q, *J* = 7.2 Hz, 2H), 2.44 (s, 3H), 0.92 (t, *J* = 7.2 Hz, 3H).

$^{13}\text{C}$  NMR (151 MHz,  $\text{CDCl}_3$ )  $\delta$  (ppm): 143.3, 137.1, 135.2, 133.5, 129.7, 129.5, 128.7, 127.1, 50.5, 42.5, 21.5, 13.4.

HRMS (ESI)  $m/z$ : Calcd for  $\text{C}_{16}\text{H}_{19}\text{O}_2\text{NClS}$   $[\text{M}+\text{H}]^+$  324.08195; Found 324.08194.

***N*-(4-Chlorobenzyl)-4-methyl-*N*-propylbenzenesulfonamide (5h)**

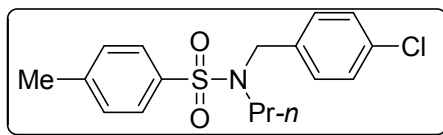

According to general procedure 2.2, **5h** was obtained in 53% (89 mg) isolated yield. White solid; Mp: 79 - 81 °C.

$^1\text{H}$  NMR (600 MHz,  $\text{CDCl}_3$ )  $\delta$  (ppm): 7.71 (d,  $J$  = 8.4 Hz, 2H), 7.31 (d,  $J$  = 8.4 Hz, 2H), 7.28 (d,  $J$  = 8.4 Hz, 2H), 7.23 (d,  $J$  = 8.4 Hz, 2H), 4.27 (s, 2H), 3.11 – 3.02 (m, 2H), 2.44 (s, 3H), 1.40 – 1.23 (m, 2H), 0.71 (t,  $J$  = 15 Hz, 3H).

$^{13}\text{C}$  NMR (151 MHz,  $\text{CDCl}_3$ )  $\delta$  (ppm): 143.3, 134.0, 135.4, 133.5, 129.7, 129.5, 128.7, 127.1, 51.3, 50.1, 21.5, 21.4, 11.1.

HRMS (ESI)  $m/z$ : Calcd for  $\text{C}_{14}\text{H}_{14}\text{O}_2\text{NSCl}$   $[\text{M}+\text{H}]^+$  338.09760; Found 338.09756.

***N*-Benzyl-*N*-(4-chlorobenzyl)-4-methylbenzenesulfonamide (5i)**

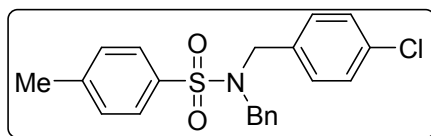

According to general procedure 2.2, **5i** was obtained in 42% (80 mg) isolated yield. White solid; Mp: 179 - 180 °C.

$^1\text{H}$  NMR (600 MHz,  $\text{CDCl}_3$ )  $\delta$  (ppm): 7.74 (d,  $J$  = 8.4 Hz, 2H), 7.32 (d,  $J$  = 8.4 Hz, 2H), 7.22 – 7.20 (m, 3H), 7.16 (d,  $J$  = 8.4 Hz, 2H), 7.04 – 7.01 (m, 2H), 6.97 (d,  $J$  = 8.4 Hz, 2H), 4.29 (s, 2H), 4.26 (s, 2H), 2.46 (s, 3H).

$^{13}\text{C}$  NMR (151 MHz,  $\text{CDCl}_3$ )  $\delta$  (ppm): 143.4, 137.5, 135.4, 134.4, 133.4, 129.8, 129.7, 128.5, 128.5, 128.4, 127.7, 127.2, 50.9, 50.0, 21.5.

HRMS (ESI)  $m/z$ : Calcd for  $\text{C}_{17}\text{H}_{20}\text{O}_2\text{NSCl}$   $[\text{M}+\text{H}]^+$  386.09760; Found 386.09756.

**4-Methoxy-*N*-(2-oxo-2-phenylethyl)-*N*-propylbenzenesulfonamide (5j)**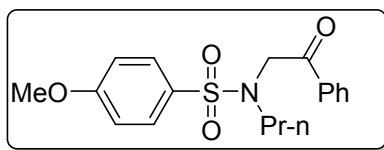

According to general procedure 2.2, **5j** was obtained in 45% (78 mg) isolated yield as a yellowish viscous oil.

**<sup>1</sup>H NMR** (600 MHz, CDCl<sub>3</sub>) δ (ppm): 7.95 (dd, *J* = 1.2, 1.2 Hz, 2H), 7.80 (d, *J* = 9.0 Hz, 2H), 7.60 (t, *J* = 7.2 Hz, 1H), 7.48 (t, *J* = 7.8 Hz, 2H), 6.97 (d, *J* = 9.0 Hz, 2H), 4.74 (s, 2H), 3.87 (s, 3H), 3.22 – 3.19 (m, 2H), 1.55 – 1.46 (m, 2H), 0.82 (t, *J* = 7.4 Hz, 3H).

**<sup>13</sup>C NMR** (151 MHz, CDCl<sub>3</sub>) δ (ppm): 194.2, 162.8, 134.9, 133.7, 129.6, 128.8, 128.0, 114.0, 55.5, 52.9, 50.0, 21.2, 11.1.

**HRMS (ESI)** *m/z*: Calcd for C<sub>18</sub>H<sub>20</sub>O<sub>4</sub>NS [M+H]<sup>+</sup> 348.12641; Found 348.12607.

***N*-(4-Chlorobenzyl)-*N*-ethylbenzenesulfonamide (5k)**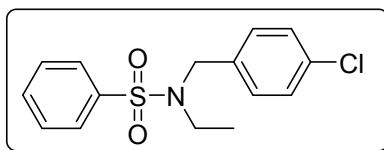

According to general procedure 2.2, **5k** was obtained in 56% (86 mg) isolated yield as a colorless liquid.

**<sup>1</sup>H NMR** (600 MHz, CDCl<sub>3</sub>) δ (ppm): 7.84 (d, *J* = 7.9 Hz, 2H), 7.62 – 7.57 (m, 1H), 7.53 (dd, *J* = 8.4, 7.1 Hz, 2H), 7.29 (d, *J* = 8.5 Hz, 2H), 7.24 (d, *J* = 8.4 Hz, 2H), 4.32 (s, 2H), 3.20 (q, *J* = 7.2 Hz, 2H), 0.92 (t, *J* = 7.2 Hz, 3H).

**<sup>13</sup>C NMR** (151 MHz, CDCl<sub>3</sub>) δ (ppm): 140.1, 135.1, 133.6, 132.5, 129.5, 129.2, 128.7, 127.0, 50.5, 42.6, 13.4 .

**HRMS (ESI)** *m/z*: Calcd for C<sub>15</sub>H<sub>17</sub>O<sub>2</sub>NSCl [M+H]<sup>+</sup> 310.06630; Found 310.06590.

***N*-Ethyl-*N*-(2-oxo-2-phenylethyl)naphthalene-2-sulfonamide (5l)**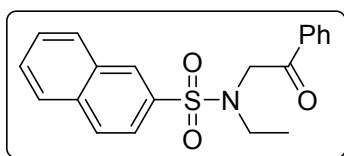



According to general procedure 2.2, **5l** was obtained in 40% (70 mg) isolated yield as a yellowish viscous oil.

**<sup>1</sup>H NMR** (600 MHz, CDCl<sub>3</sub>) δ (ppm): 8.45 (s, 1H), 7.98 – 7.94 (m, 4H), 7.91 (d, *J* = 8.1 Hz, 1H), 7.85 (dd, *J* = 8.7, 1.9 Hz, 1H), 7.67 – 7.61 (m, 1H), 7.65 – 7.57 (m, 2H), 7.48 (t, *J* = 7.7 Hz, 2H), 4.83 (s, 2H), 3.41 (q, *J* = 7.2 Hz, 2H), 1.11 (t, *J* = 7.2 Hz, 3H).

**<sup>13</sup>C NMR** (151 MHz, CDCl<sub>3</sub>) δ (ppm): 194.0, 136.8, 134.9, 134.8, 133.8, 132.1, 129.2, 129.2, 128.8, 128.7, 128.6, 128.0, 127.9, 127.3, 122.9, 52.3, 43.2, 13.4.

**HRMS (ESI) *m/z***: Calcd for C<sub>20</sub>H<sub>20</sub>O<sub>3</sub>NS [M+H]<sup>+</sup> 354.11584; Found 354.11576.

#### *N,N*-Diethylthiophene-2-sulfonamide (**5m**)<sup>[6]</sup>

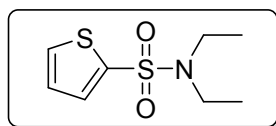

According to general procedure 2.2, **5m** was obtained in 64% (70 mg) yield as a brownish oil.

**<sup>1</sup>H NMR** (600 MHz, CDCl<sub>3</sub>) δ (ppm): 7.55 (d, *J* = 4.2 Hz, 2H), 7.08 (t, *J* = 4.2 Hz, 1H), 3.25 (q, *J* = 7.2 Hz, 4H), 1.18 (t, *J* = 7.2 Hz, 6H).

**<sup>13</sup>C NMR** (151 MHz, CDCl<sub>3</sub>) δ (ppm): 140.8, 131.3, 131.1, 127.2, 42.6, 14.2.

#### Methyl 2-(*N*-(4-chlorobenzyl)-*N*-ethylsulfamoyl)thiophene-3-carboxylate (**5n**)

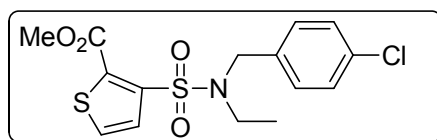

According to general procedure 2.2, **5n** was obtained in 47% (87 mg) isolated yield as a colorless liquid.

**<sup>1</sup>H NMR** (600 MHz, CDCl<sub>3</sub>) δ (ppm): 7.50 (d, *J* = 5.2 Hz, 1H), 7.47 (d, *J* = 5.4 Hz, 1H), 7.29 (d, *J* = 8.4 Hz, 1H), 7.25 (d, *J* = 8.5 Hz, 1H), 4.59 (s, 1H), 3.92 (s, 2H), 3.33 (q, *J* = 7.2 Hz, 2H), 0.97 (t, *J* = 7.1 Hz, 2H).

**<sup>13</sup>C NMR** (151 MHz, CDCl<sub>3</sub>) δ (ppm): 156.0, 143.6, 135.4, 133.4, 132.8, 131.6, 129.4, 129.1, 128.7, 53.0, 50.3, 42.0, 13.1 .

**HRMS (ESI) *m/z***: Calcd for C<sub>15</sub>H<sub>17</sub>O<sub>4</sub>NCIS<sub>2</sub> [M+H]<sup>+</sup> 374.02820; Found 374.02796.

***N*-Methyl-*N*-(2-oxo-2-phenylethyl)cyclopropanesulfonamide (5o)**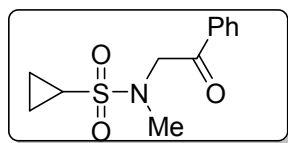

According to general procedure 2.2, **5o** was obtained in 46% (58 mg) isolated yield as a yellowish viscous oil.

<sup>1</sup>H NMR (600 MHz, CDCl<sub>3</sub>) δ (ppm): 7.95 (d, *J* = 7.8 Hz, 2H), 7.62 (t, *J* = 7.4 Hz, 1H), 7.50 (t, *J* = 7.2 Hz, 2H), 4.79 (s, 2H), 3.05 (s, 3H), 2.62 (tt, *J* = 8.0, 4.9 Hz, 1H), 1.20 – 1.14 (m, 2H), 1.03 (dd, *J* = 2.4, 2.4 Hz, 2H).

<sup>13</sup>C NMR (151 MHz, CDCl<sub>3</sub>) δ (ppm): 194.6, 134.6, 134.0, 128.9, 127.9, 56.4, 35.9, 28.9, 5.1.

HRMS (ESI) *m/z*: Calcd for C<sub>12</sub>H<sub>15</sub>O<sub>3</sub>NNaS [M+H]<sup>+</sup> 276.06649; Found 276.06619.

**References:**

- [1] Y. Cai; R. Zhang, *Synlett*, **2017**, 28, 1630.
- [2] W. Zhang, Z. Zou, Y. Wang, *Angew. Chem.* **2019**, 131, 634.
- [3] S.-H. Su, M.-D. Su, *RSC Adv.*, **2016**, 6, 80712.
- [4] F. Zhang, D. Zheng, *Org. Lett.*, **2018**, 20, 1167.
- [5] Z. Zhang, Y.-H. Liu, *Tetrahedron*, **2019**, 75, 2763.
- [6] Y. Fu, Q.-S. Xu, C.-Z. Shi, *Adv. Syn. Catal.*, **2018**, 360, 3502.

**5. Copies of NMR spectra of compounds**

***N*-(4-Chlorobenzyl)-*N*,4-dimethylbenzenesulfonamide (3a)**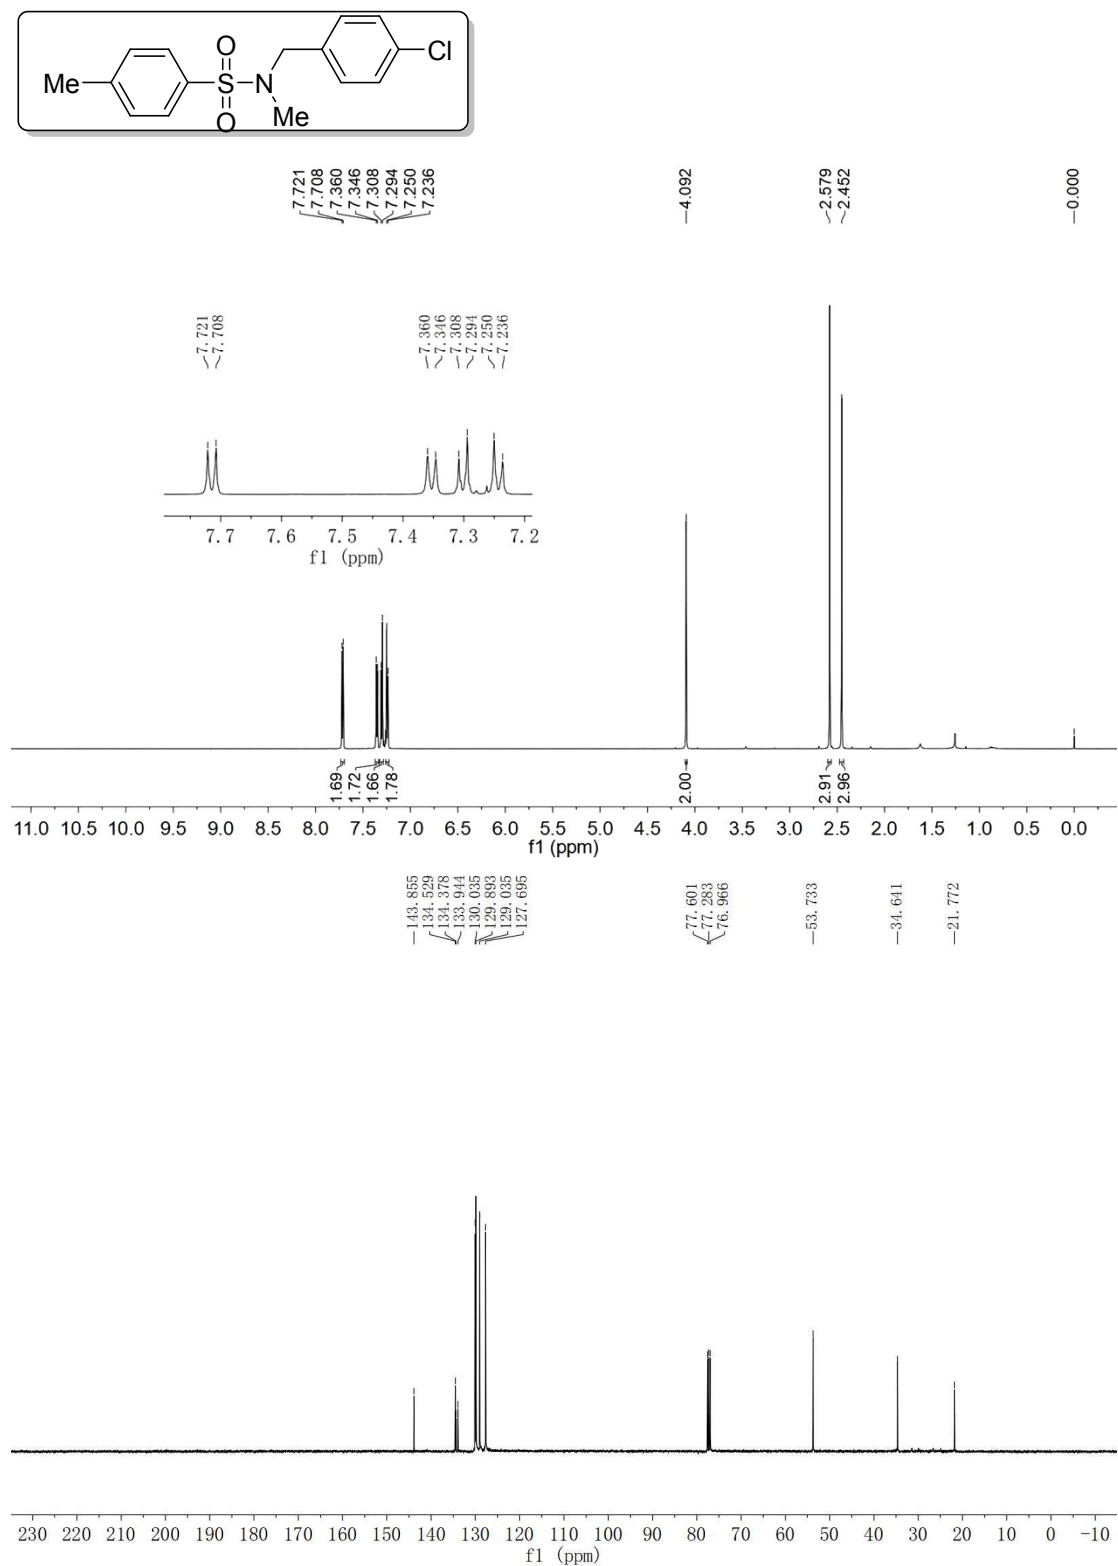**Figure S1. <sup>1</sup>H (600 MHz) and <sup>13</sup>C (151 MHz) NMR spectra of 3a in CDCl<sub>3</sub>.*****N*-(4-Chlorobenzyl)-*N*-methylbenzenesulfonamide (3b)**

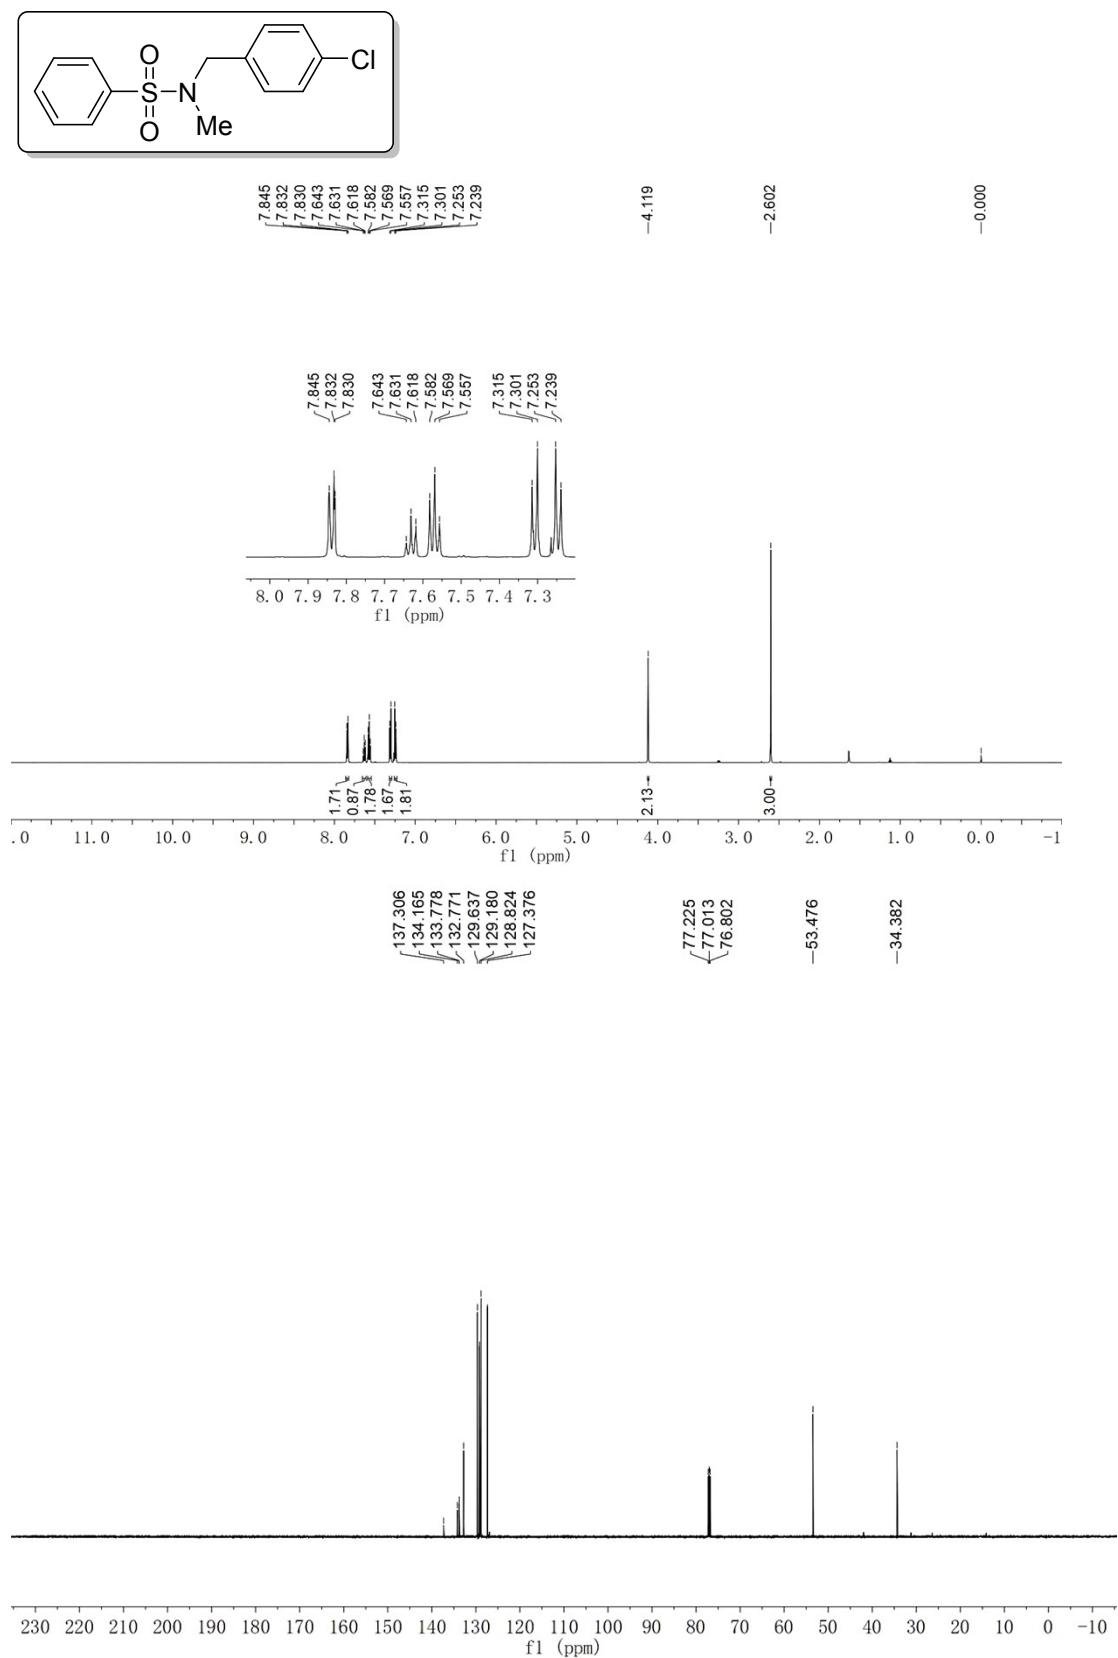

Figure S2. <sup>1</sup>H (600 MHz) and <sup>13</sup>C (151 MHz) NMR spectra of 3b in CDCl<sub>3</sub>.

*N*-(4-Chlorobenzyl)-2,4,6-triisopropyl-*N*-methylbenzenesulfonamide (3c)

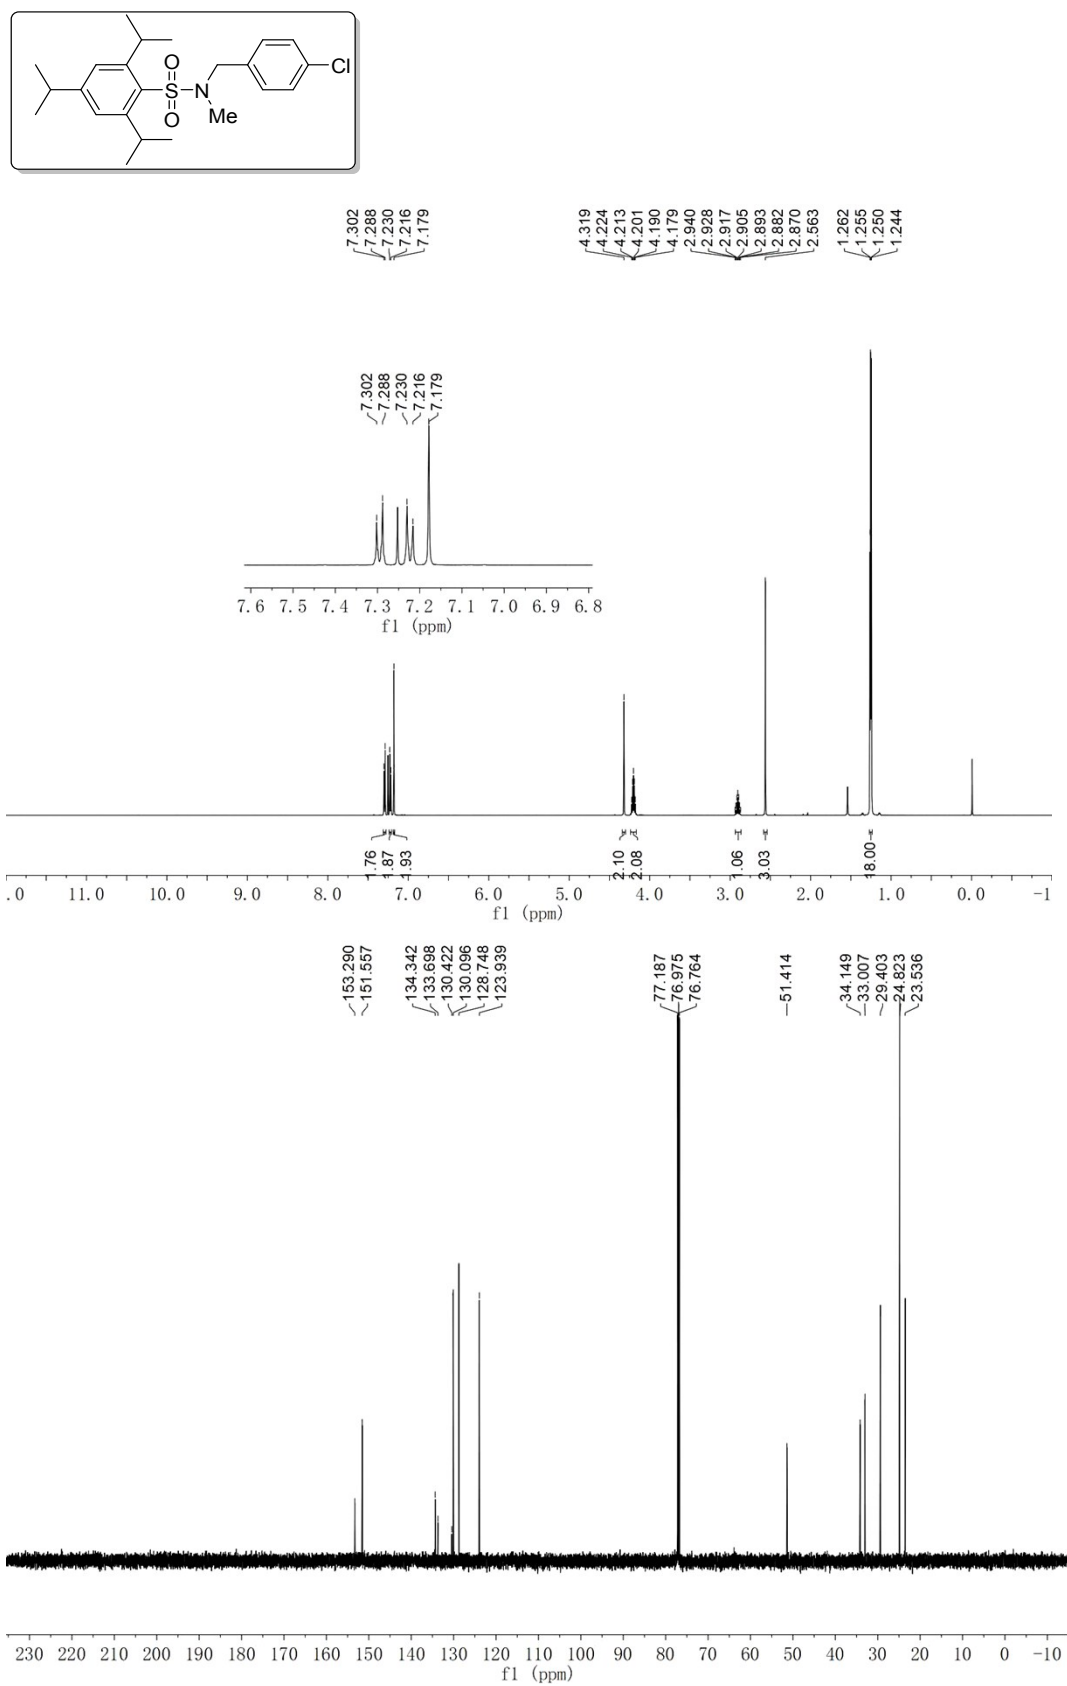

Figure S3. <sup>1</sup>H (600 MHz) and <sup>13</sup>C (151 MHz) NMR spectra of 3c in CDCl<sub>3</sub>.

**N-(4-Chlorobenzyl)-N,2,2,4,6,7-hexamethyl-2,3-dihydrobenzofuran-5-sulfonamide (3d)**

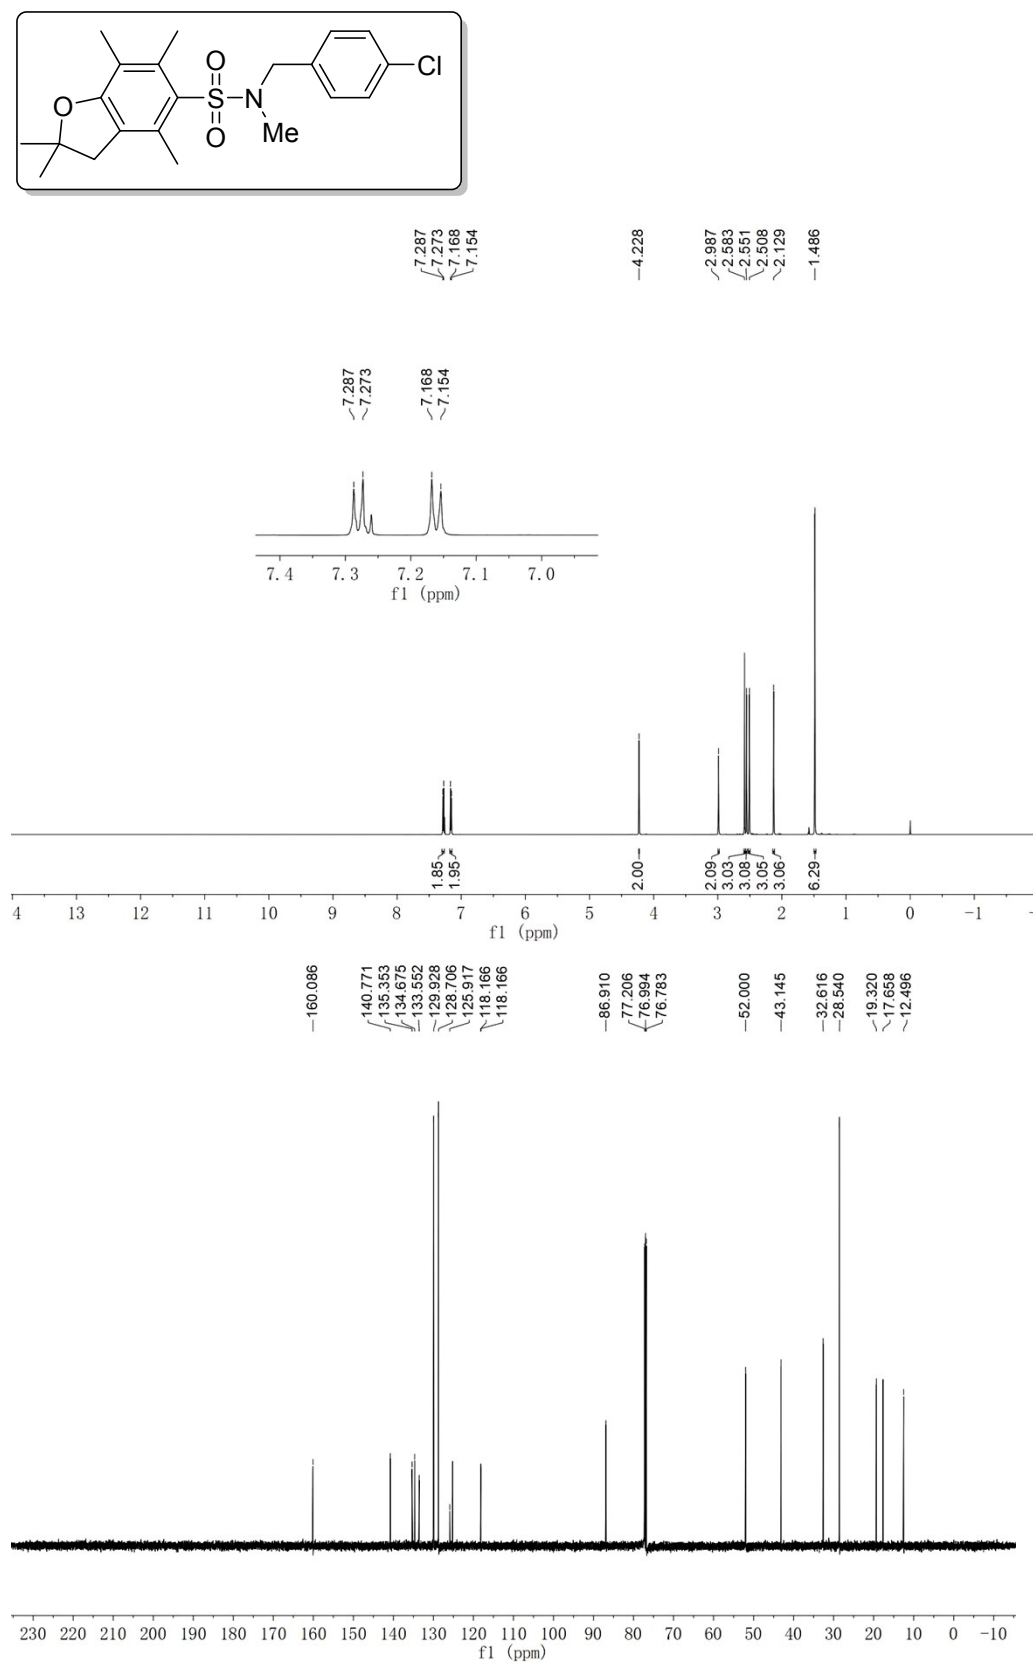

**Figure S4.** <sup>1</sup>H (600 MHz) and <sup>13</sup>C (151 MHz) NMR spectra of 3d in CDCl<sub>3</sub>.

***N*-(4-Chlorobenzyl)-4-methoxy-*N*-methylbenzenesulfonamide (3e)**

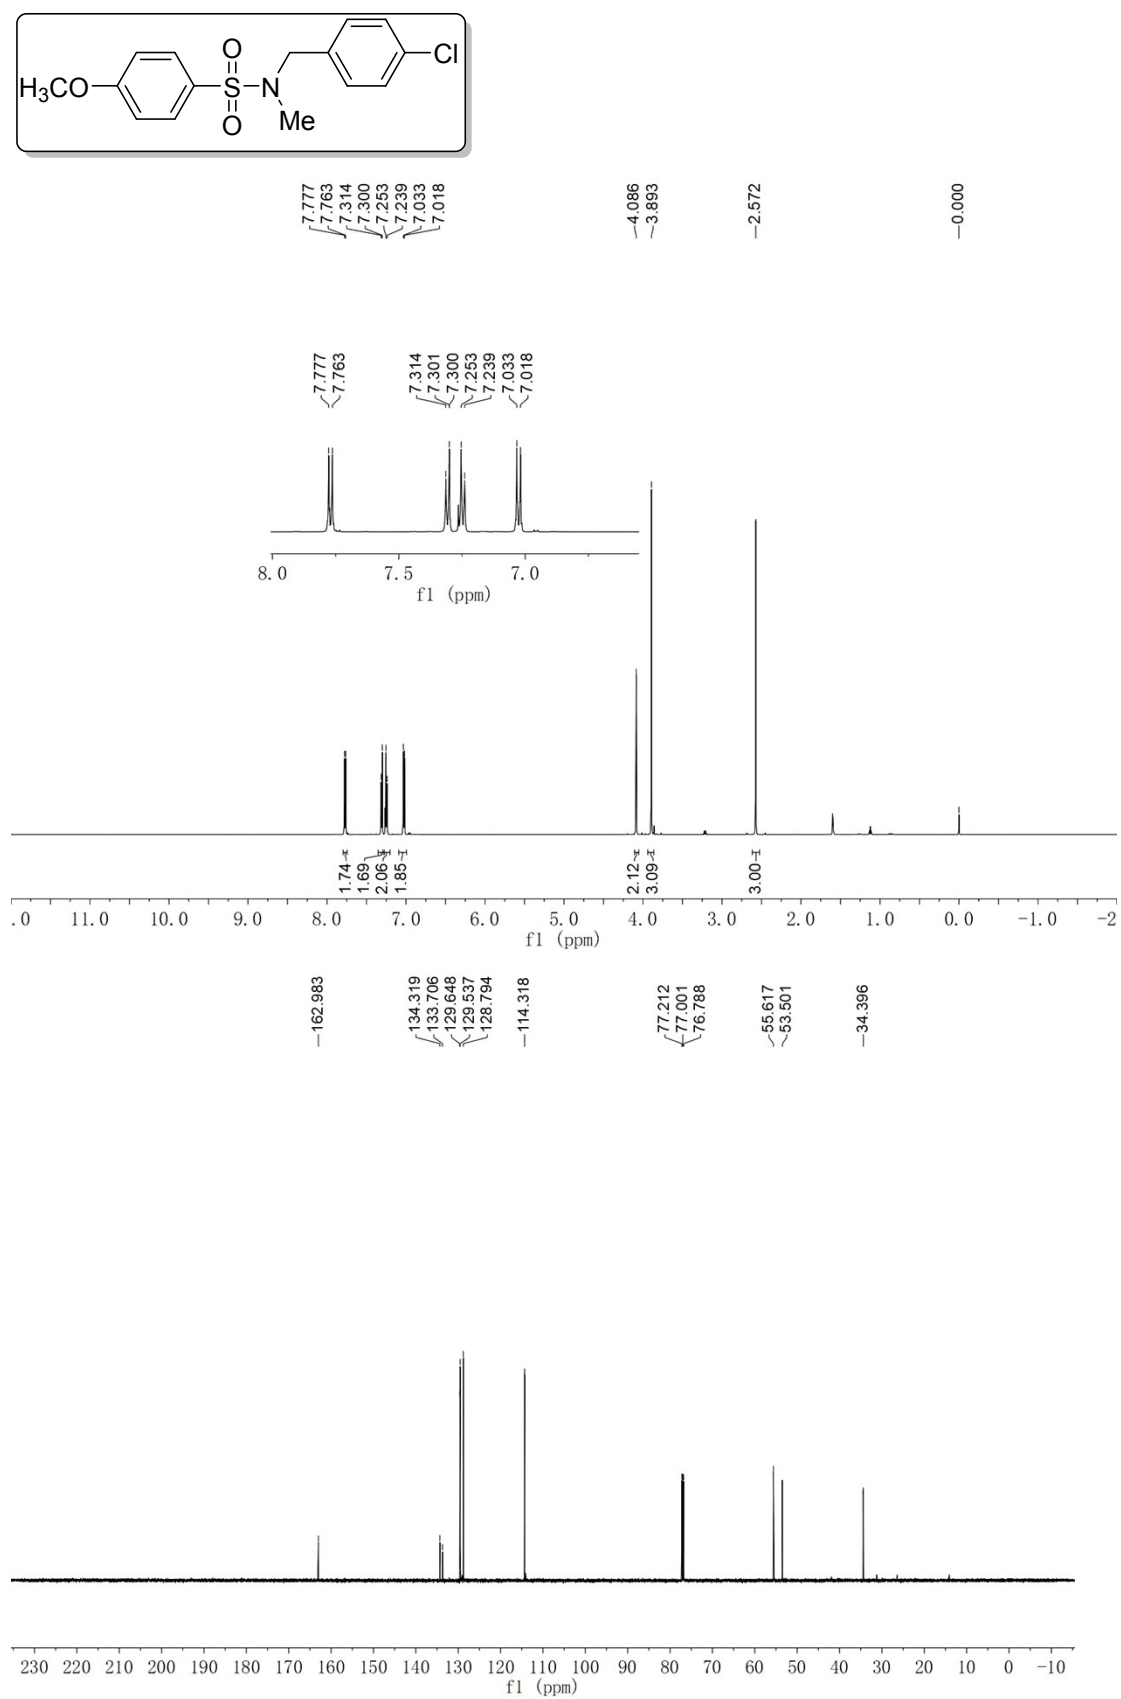

Figure S5. <sup>1</sup>H (600 MHz) and <sup>13</sup>C (151 MHz) NMR spectra of 3e in CDCl<sub>3</sub>.

*N*-(4-Chlorobenzyl)-*N*-methyl-4-(trifluoromethyl)benzenesulfonamide (3f)

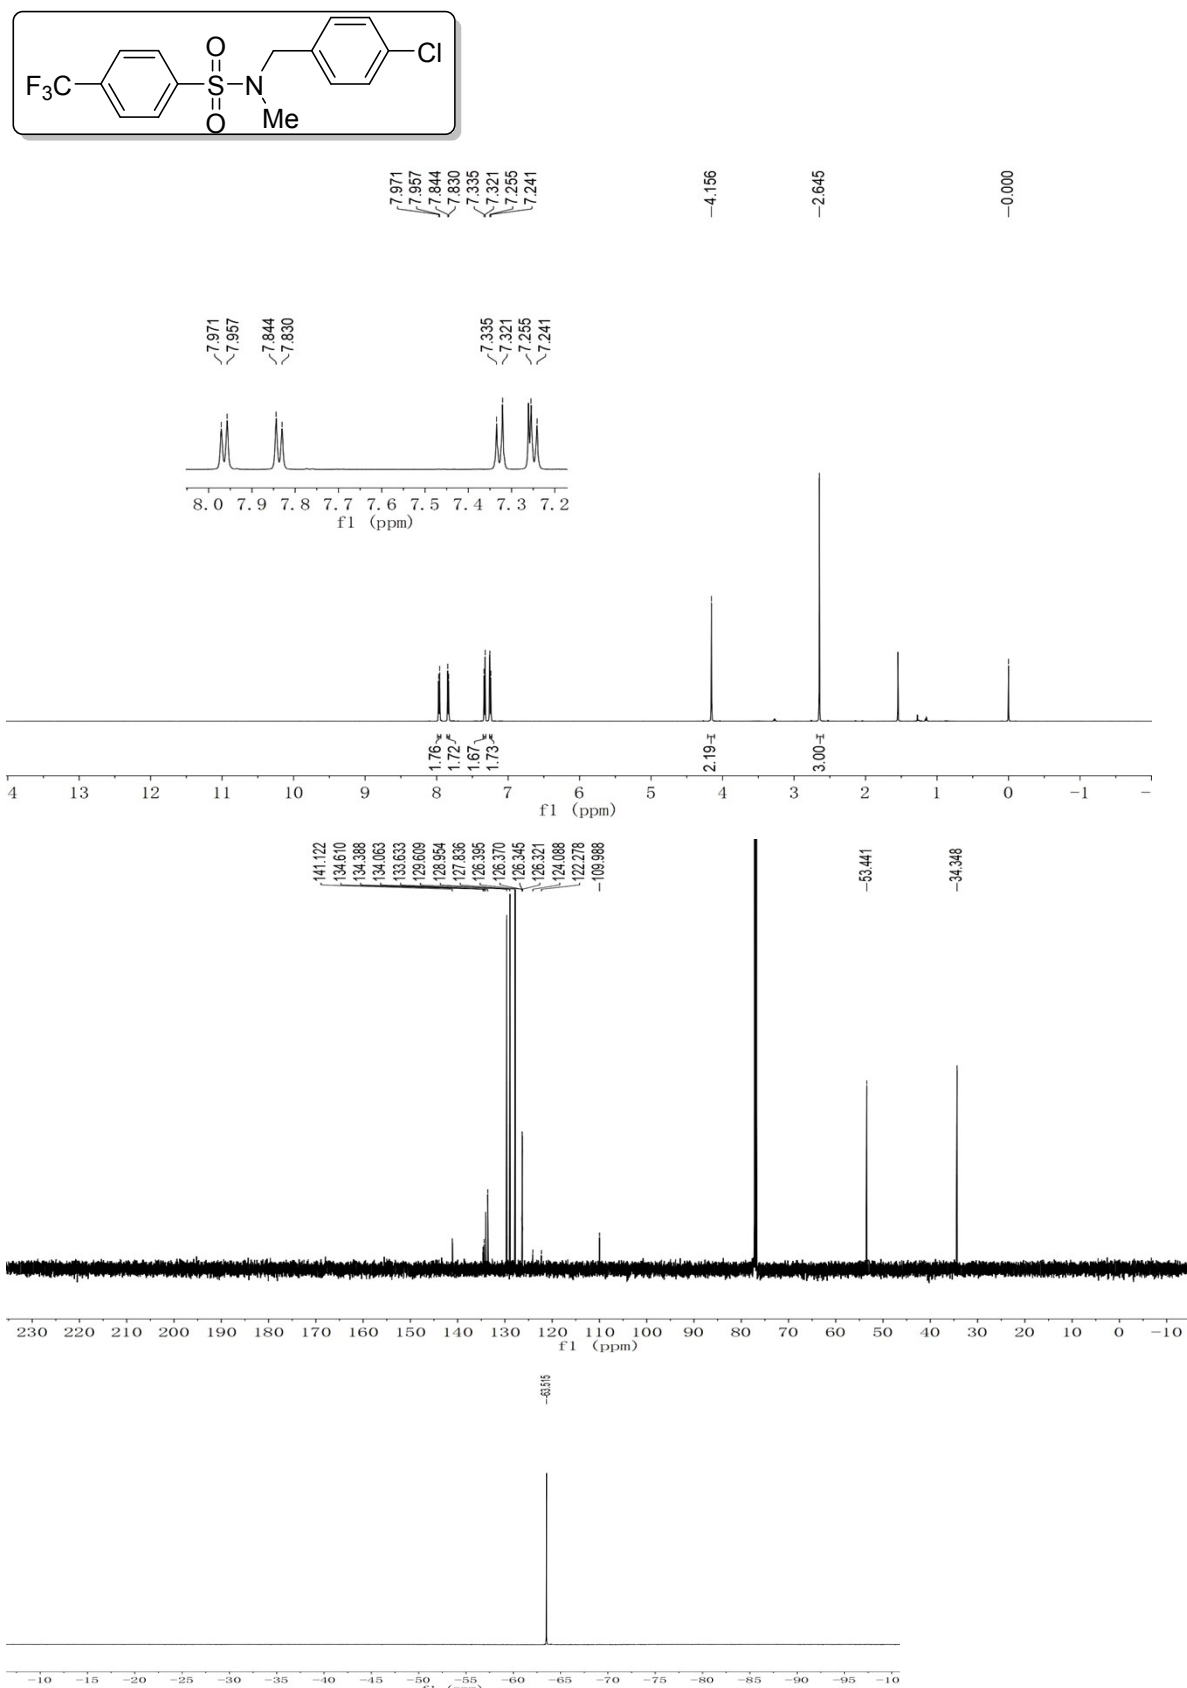

Figure S6. <sup>1</sup>H (600 MHz), <sup>13</sup>C (151 MHz) and <sup>19</sup>F (376 M) NMR spectra of 3f in CDCl<sub>3</sub>.

*N*-(4-Chlorobenzyl)-*N*-methyl-2-(trifluoromethoxy)benzenesulfonamide (3g)



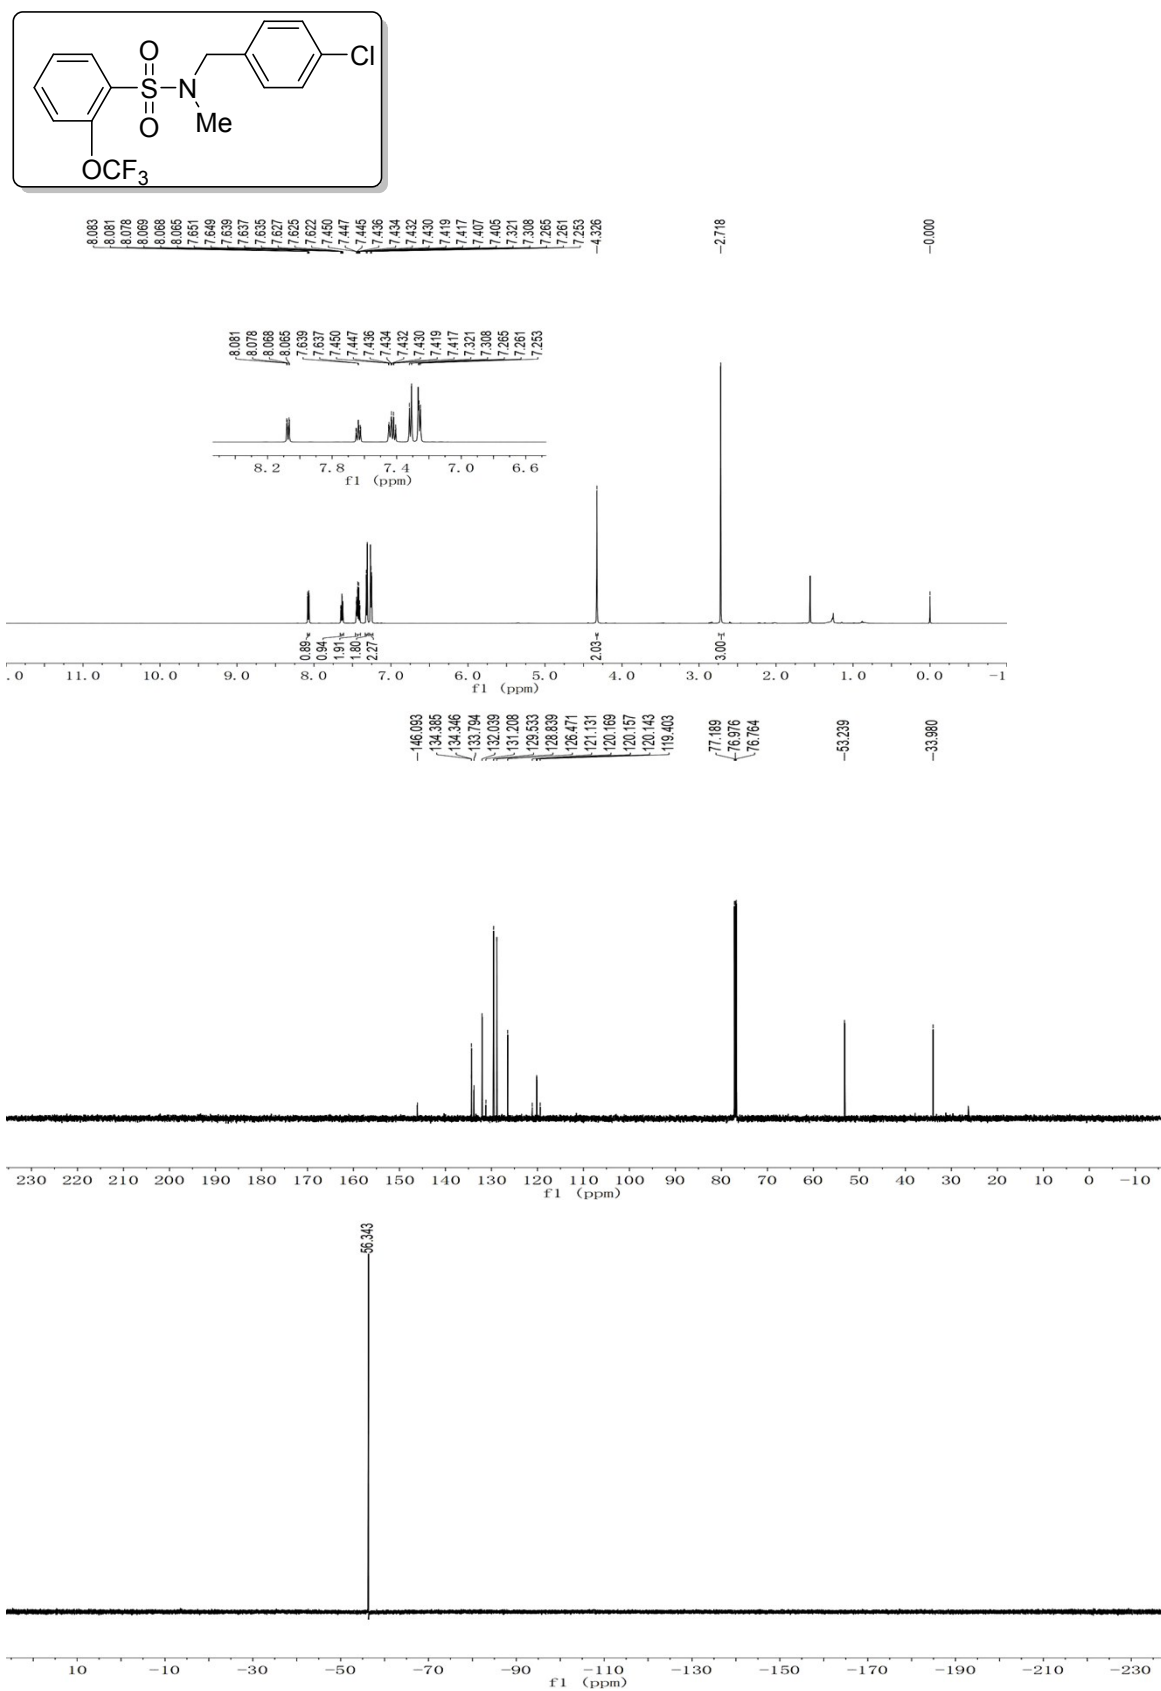

Figure S7. <sup>1</sup>H (600 MHz), <sup>13</sup>C (151 MHz) and <sup>19</sup>F (376 M) NMR spectra of 3g in CDCl<sub>3</sub>.

*N*-(4-Chlorobenzyl)-4-fluoro-*N*-methylbenzenesulfonamide (3h)

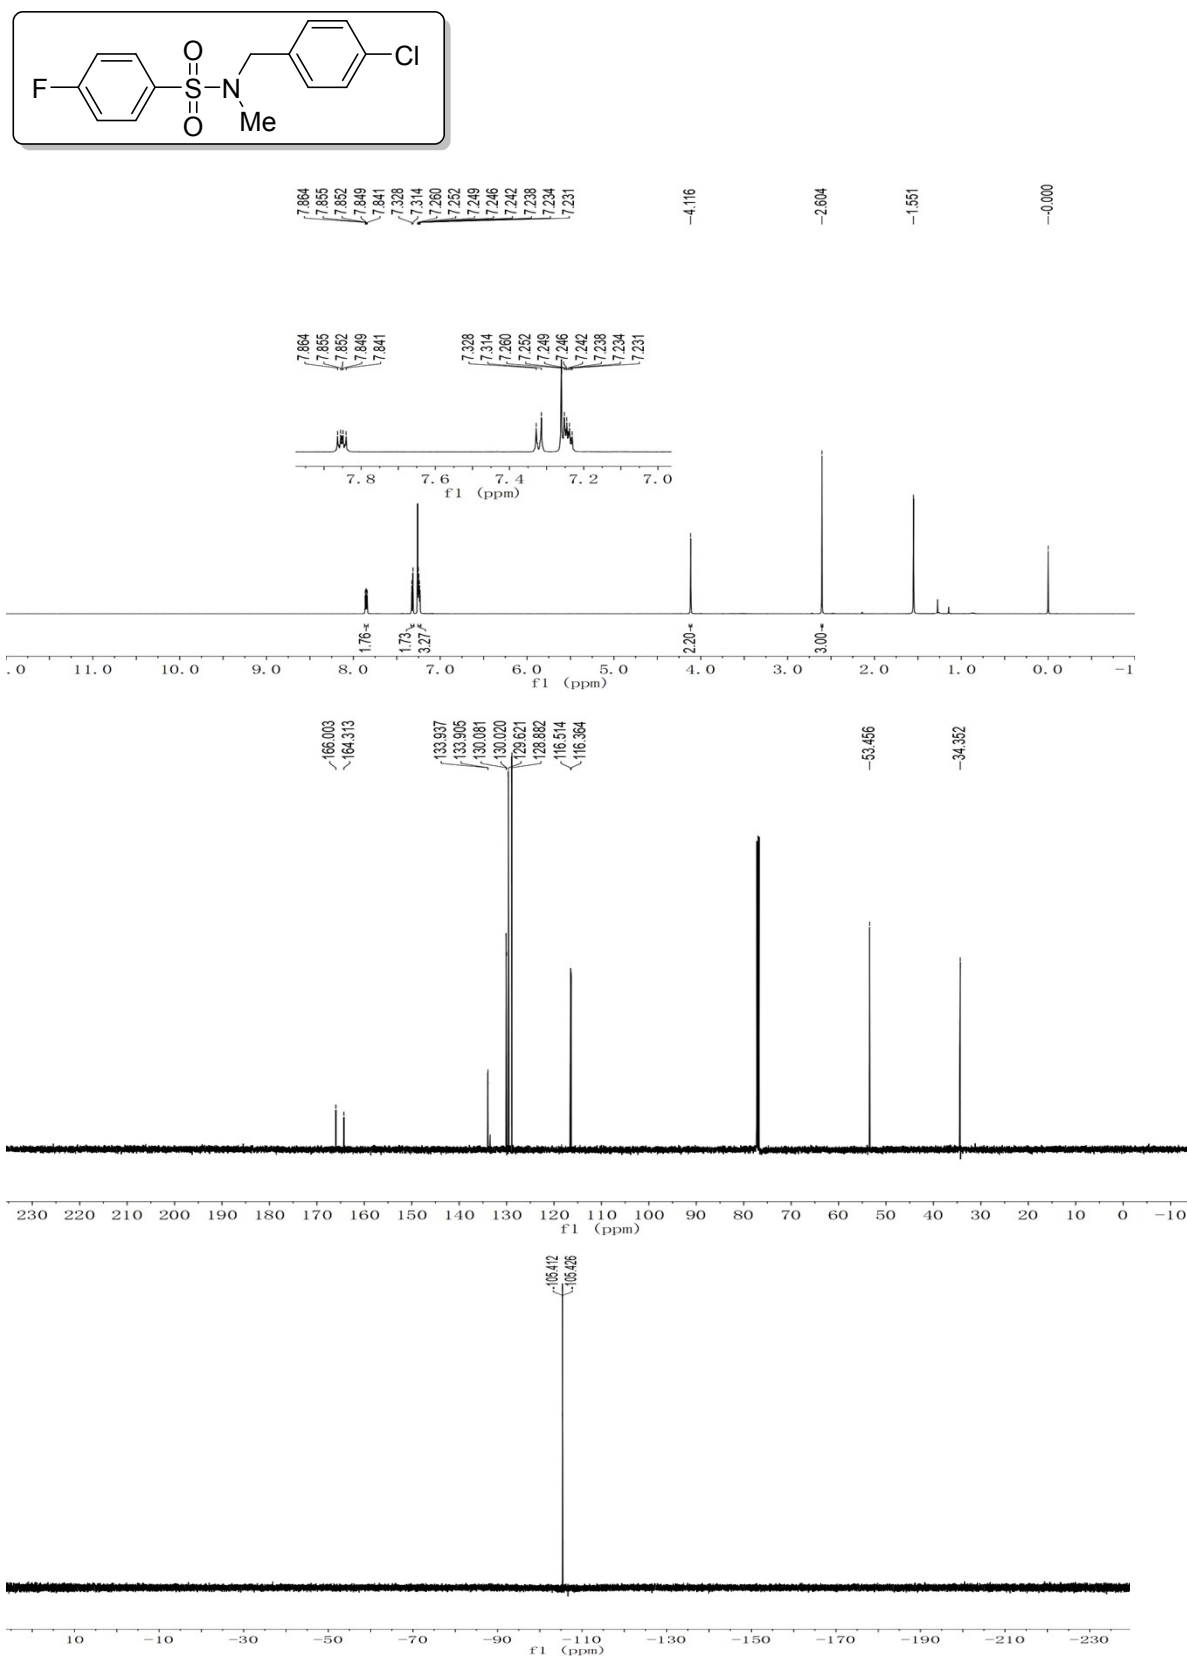

Figure S8.  $^1\text{H}$  (600 MHz),  $^{13}\text{C}$  (151 MHz) and  $^{19}\text{F}$  (376 M) NMR spectra of 3h in  $\text{CDCl}_3$ .

4-Chloro-*N*-(4-chlorobenzyl)-*N*-methylbenzenesulfonamide (3i)

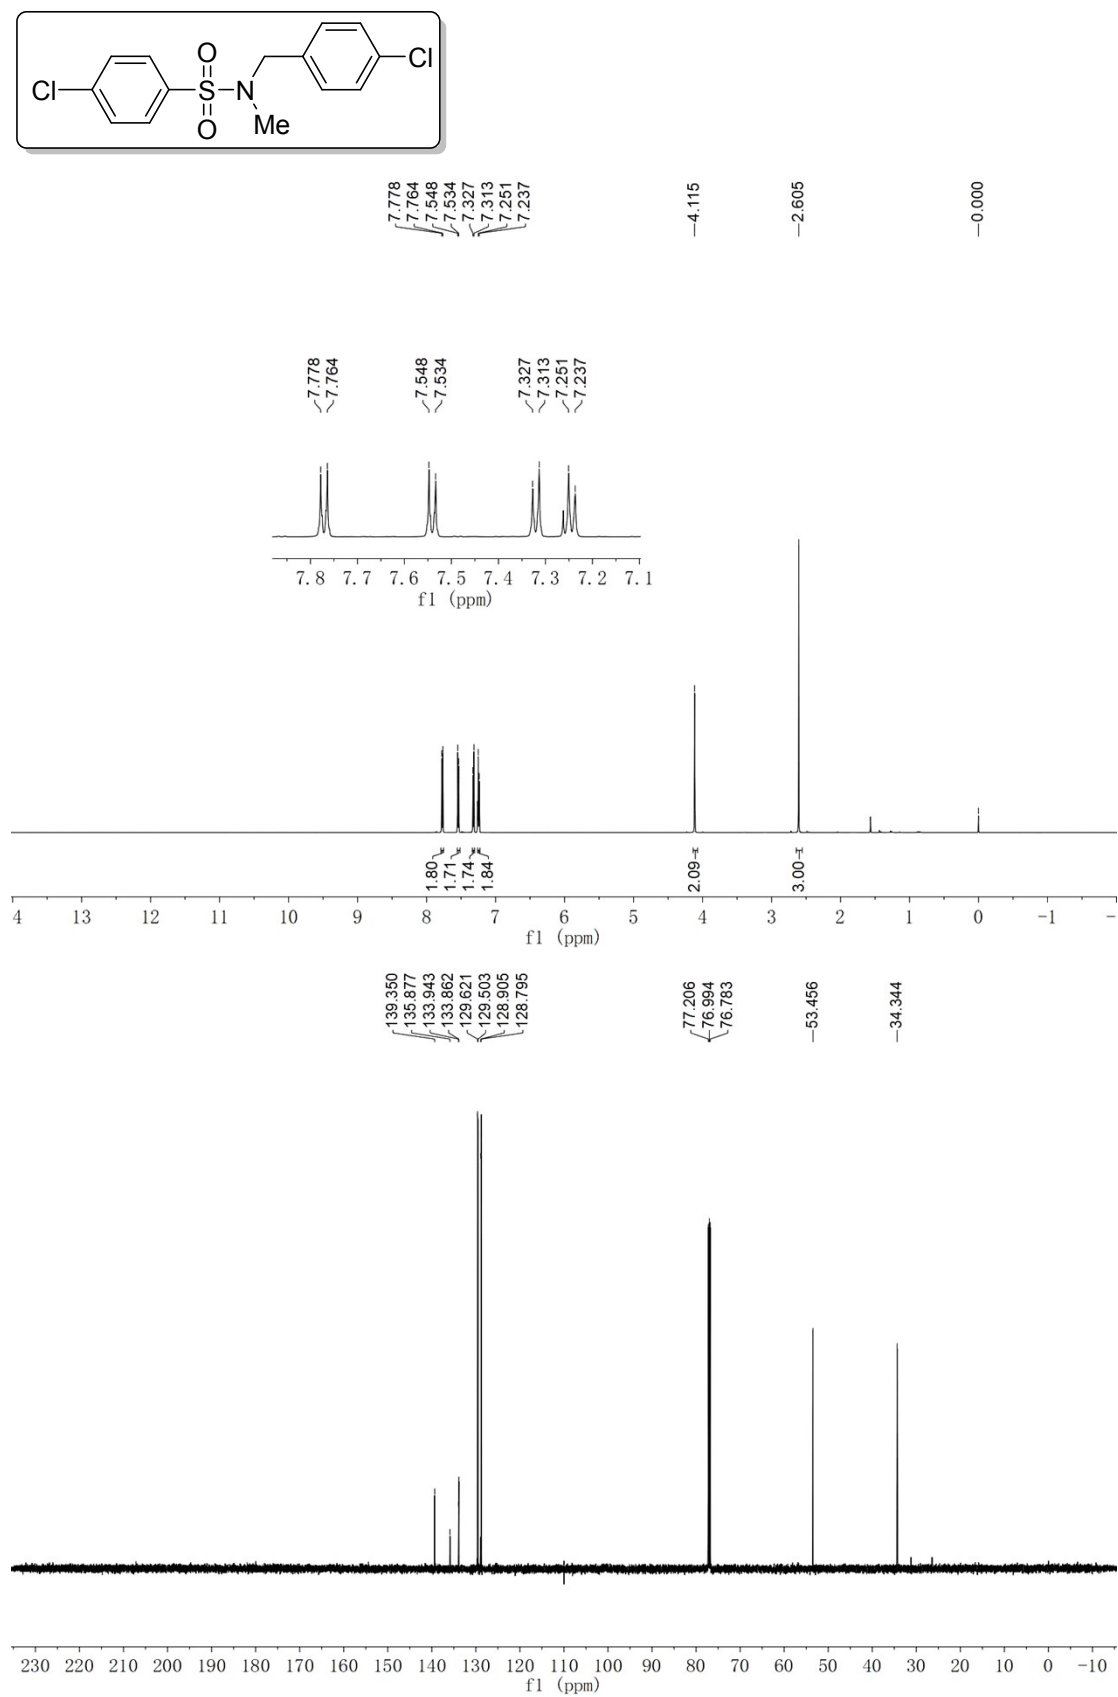

Figure S9. <sup>1</sup>H (600 MHz) and <sup>13</sup>C (151 MHz) NMR spectra of 3i in CDCl<sub>3</sub>.

4-bromo-N-(4-chlorobenzyl)-N-methylbenzenesulfonamide (3j)

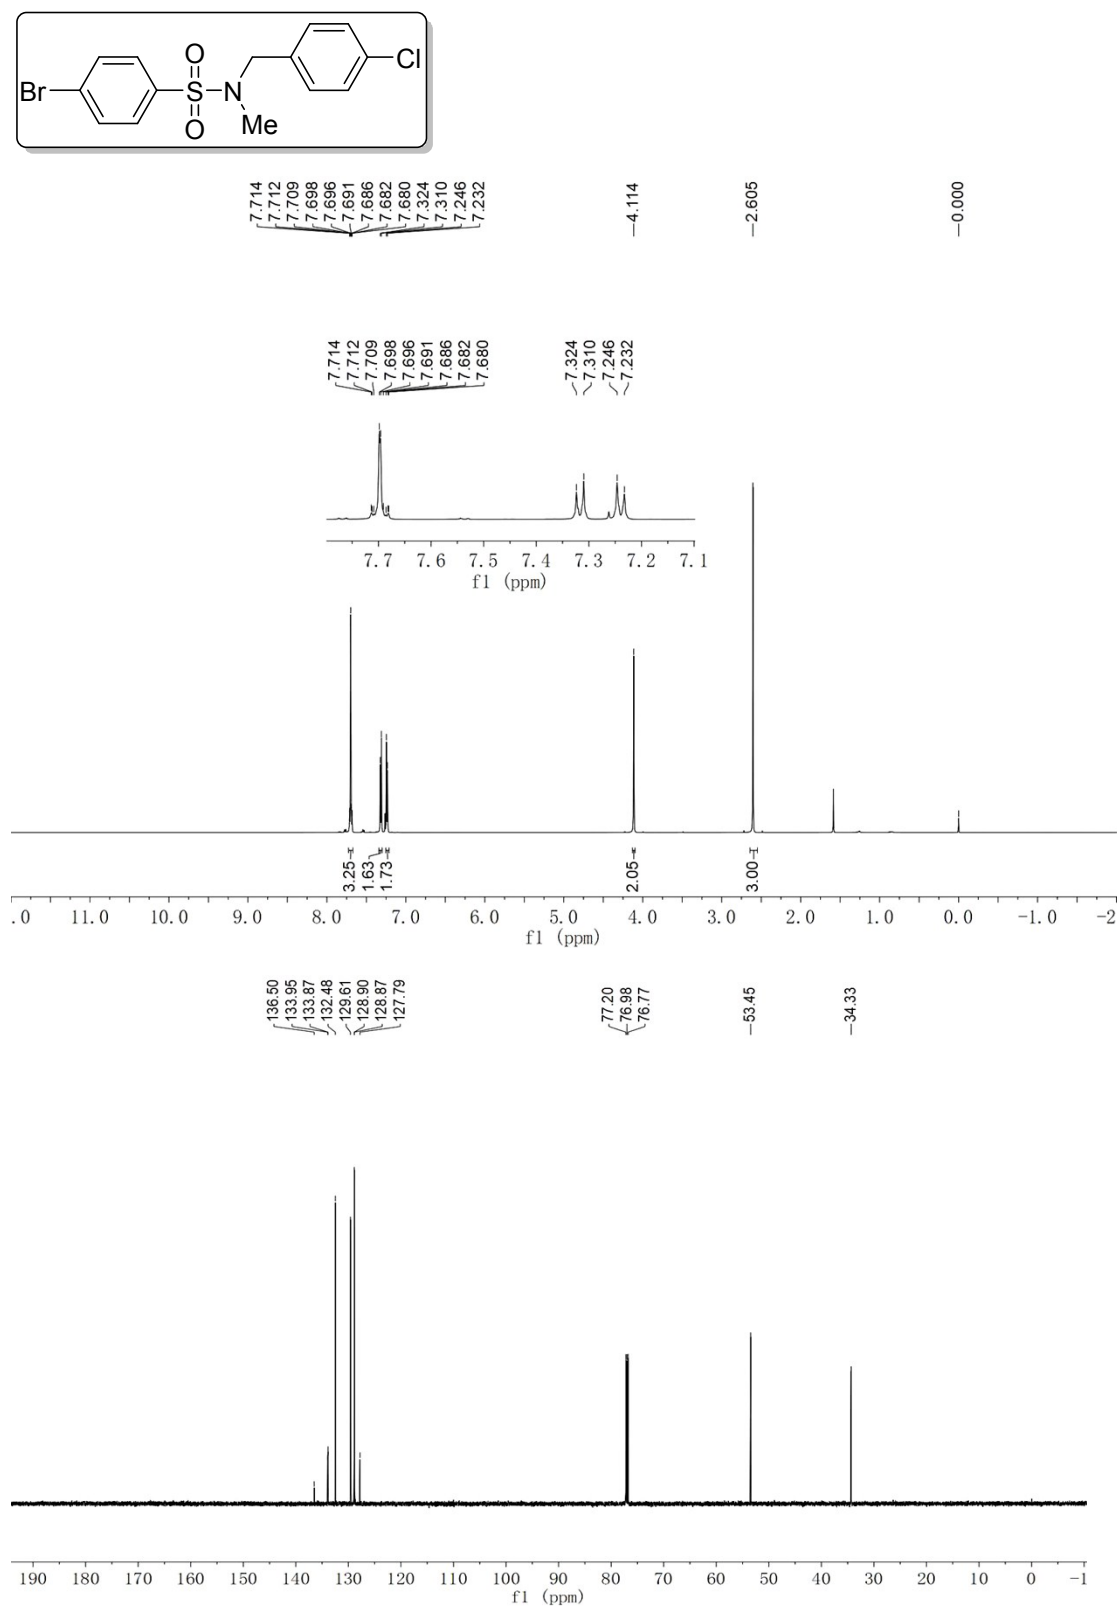

Figure S10. <sup>1</sup>H (600 MHz) and <sup>13</sup>C (151 MHz) NMR spectra of 3j in CDCl<sub>3</sub>.

*N*-(4-Chlorobenzyl)-3,4-difluoro-*N*-methylbenzenesulfonamide (3k)

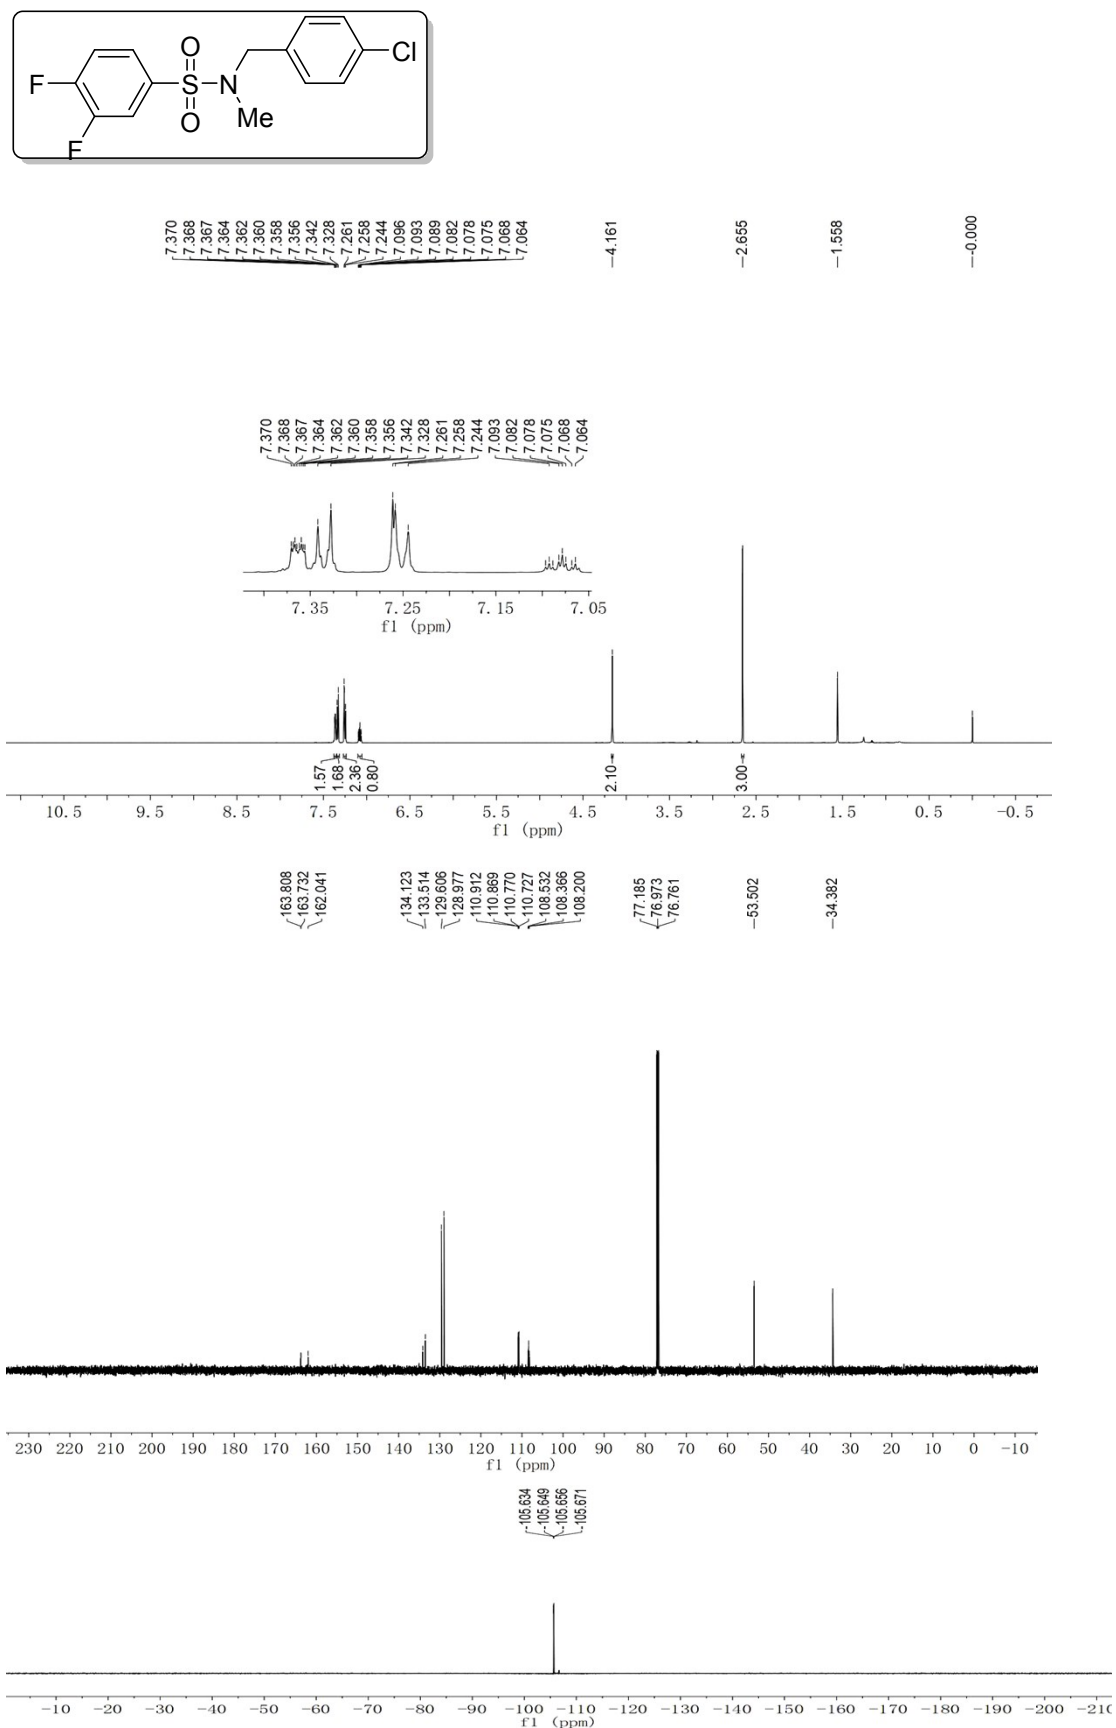

Figure S11. <sup>1</sup>H (600 MHz), <sup>13</sup>C (151 MHz) and <sup>19</sup>F (376 M) NMR spectra of 3k in CDCl<sub>3</sub>.

*N*-(4-Chlorobenzyl)-*N*-methylnaphthalene-2-sulfonamide (3n)

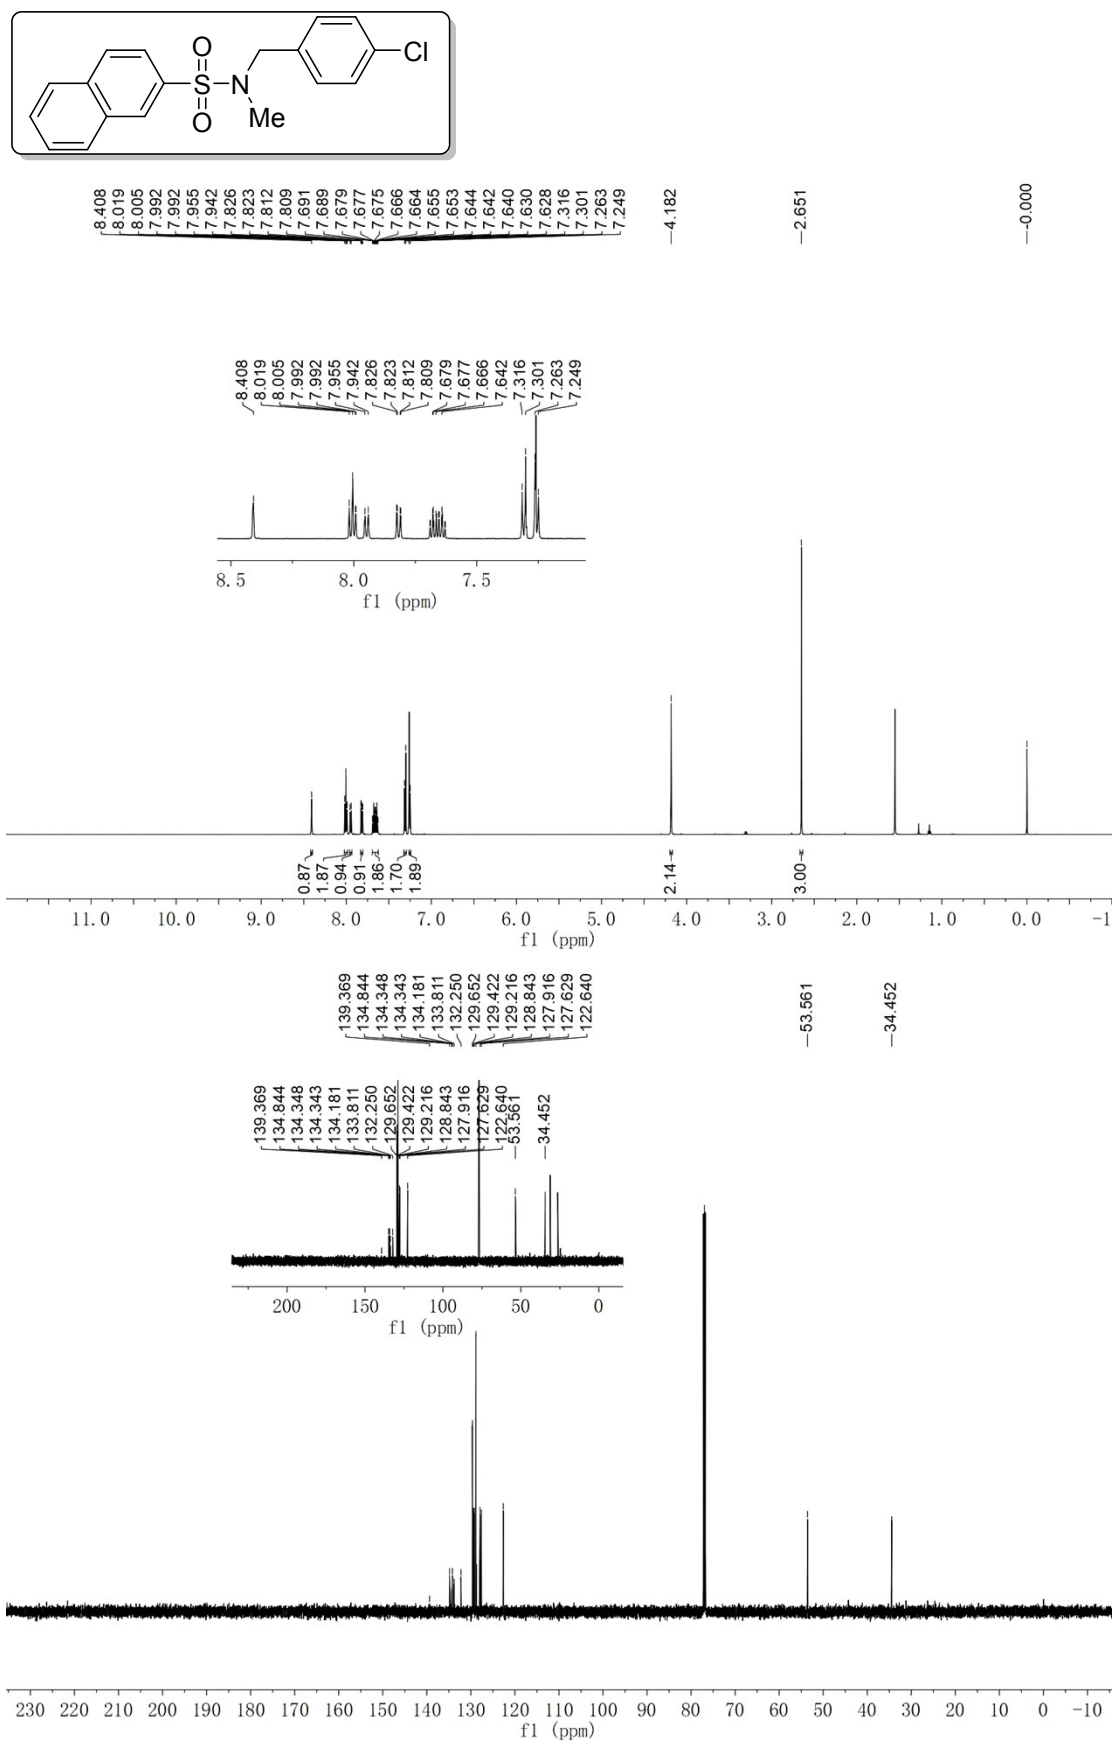

Figure S12. <sup>1</sup>H (600 MHz) and <sup>13</sup>C (151 MHz) NMR spectra of 3n in CDCl<sub>3</sub>.

*N*-(4-Chlorobenzyl)-*N*-methylthiophene-2-sulfonamide (3n)

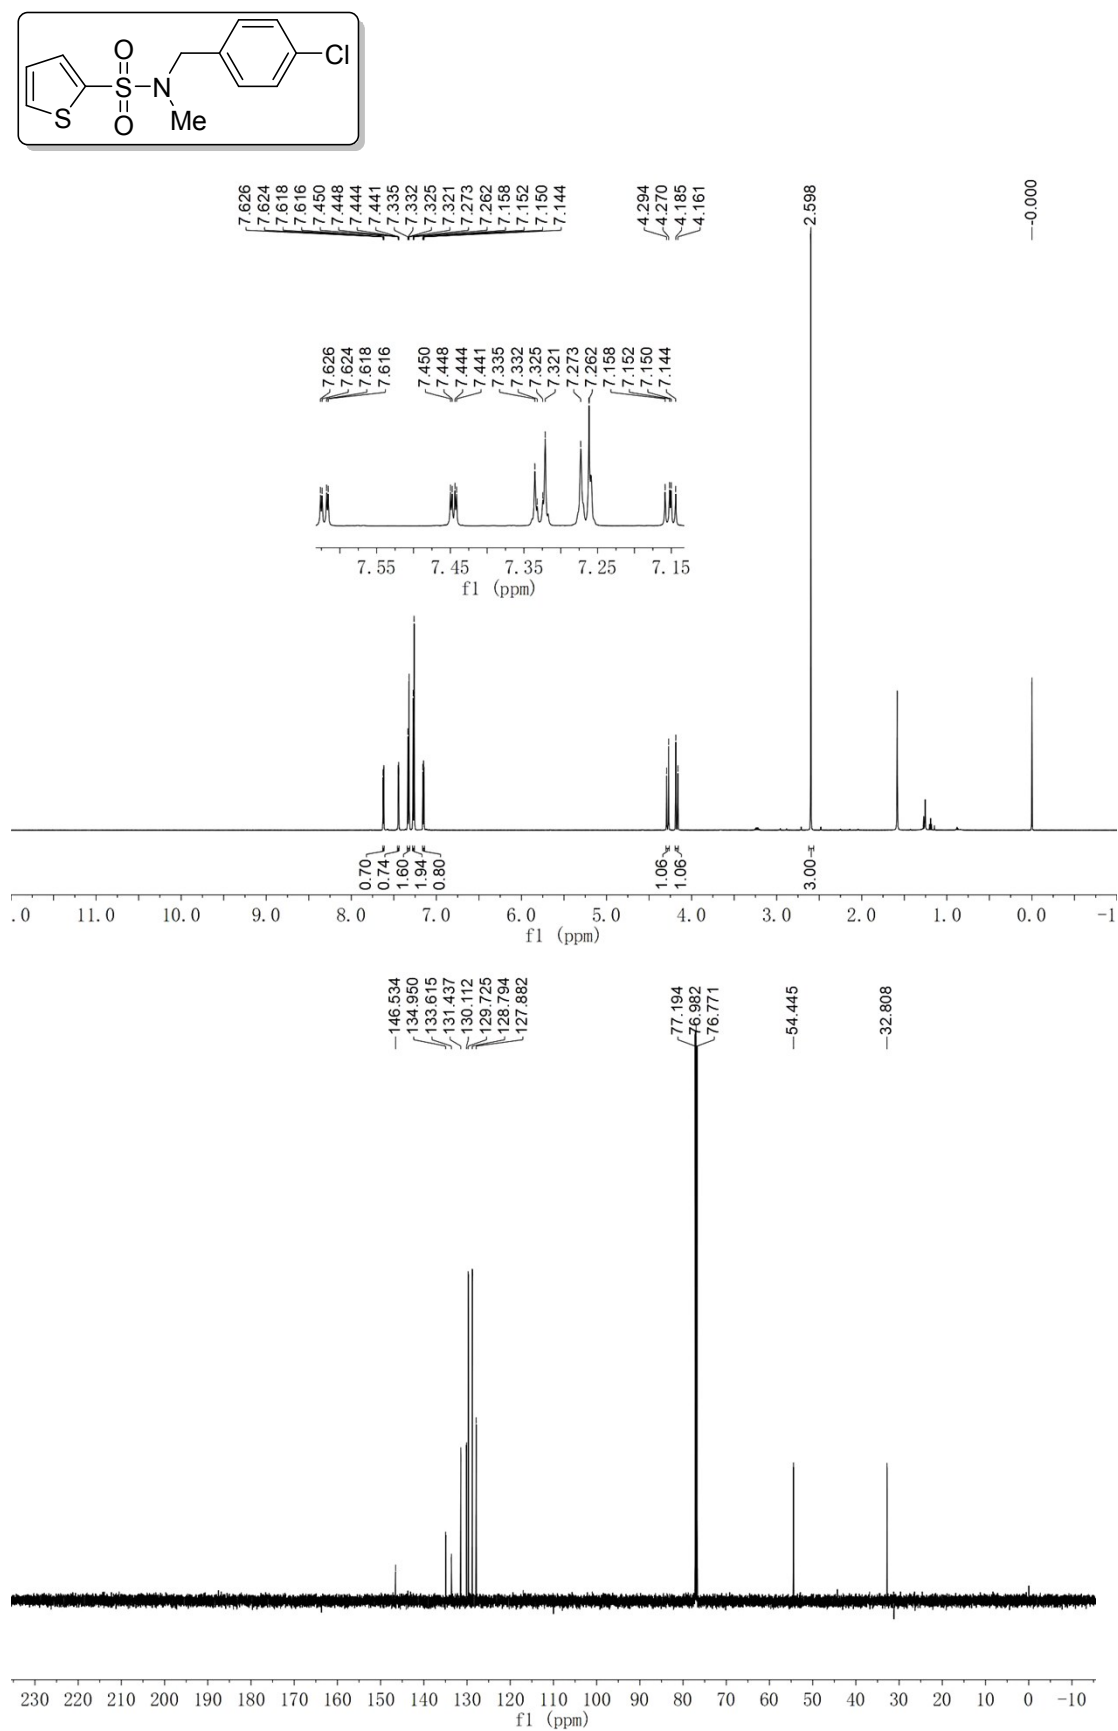

**Figure S13.** <sup>1</sup>H (600 MHz) and <sup>13</sup>C (151 MHz) NMR spectra of **3o** in CDCl<sub>3</sub>.  
**Methyl-2-(*N*-(4-chlorobenzyl)-*N*-methylsulfamoyl)thiophene-3-carboxylate (**3p**)**

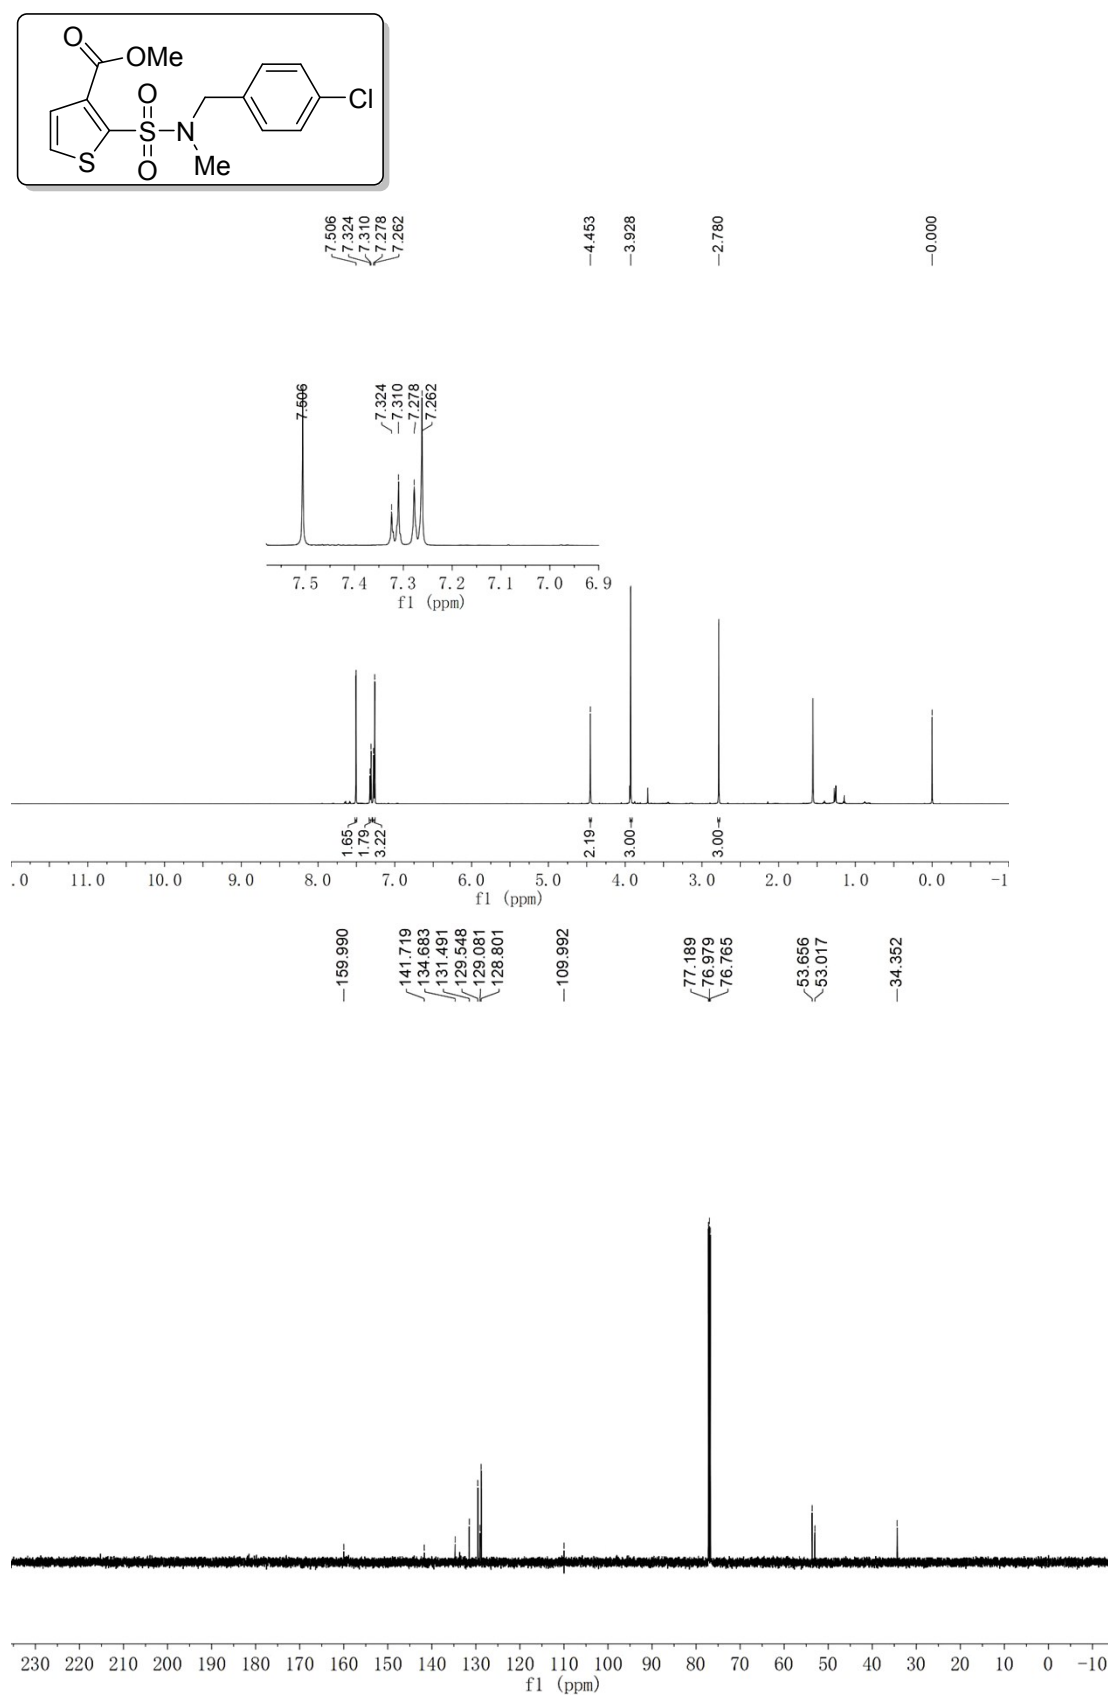

Figure S14. <sup>1</sup>H (600 MHz) and <sup>13</sup>C (151 MHz) NMR spectra of 3p in CDCl<sub>3</sub>.

*N*-Ethyl-*N*,4-dimethylbenzenesulfonamide (5a)



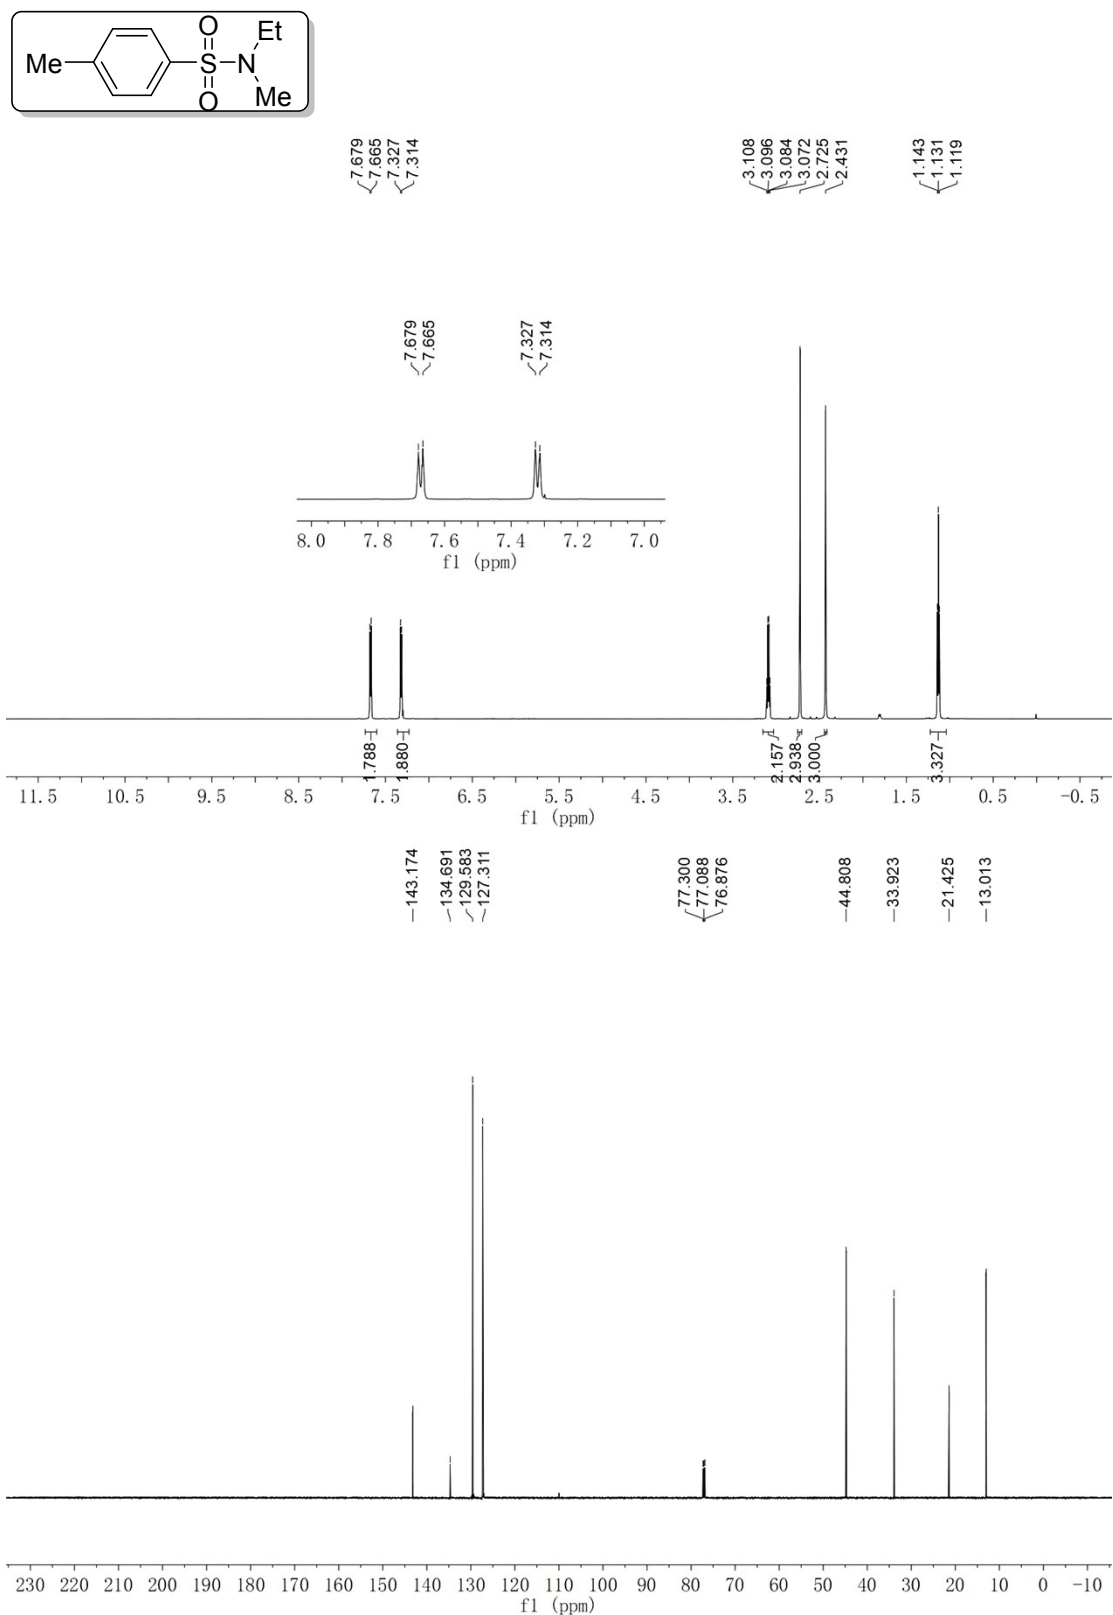

Figure S15. <sup>1</sup>H (600 MHz) and <sup>13</sup>C (151 MHz) NMR spectra of 5a in CDCl<sub>3</sub>.

*N*-Allyl-*N*,4-dimethylbenzenesulfonamide (5b)

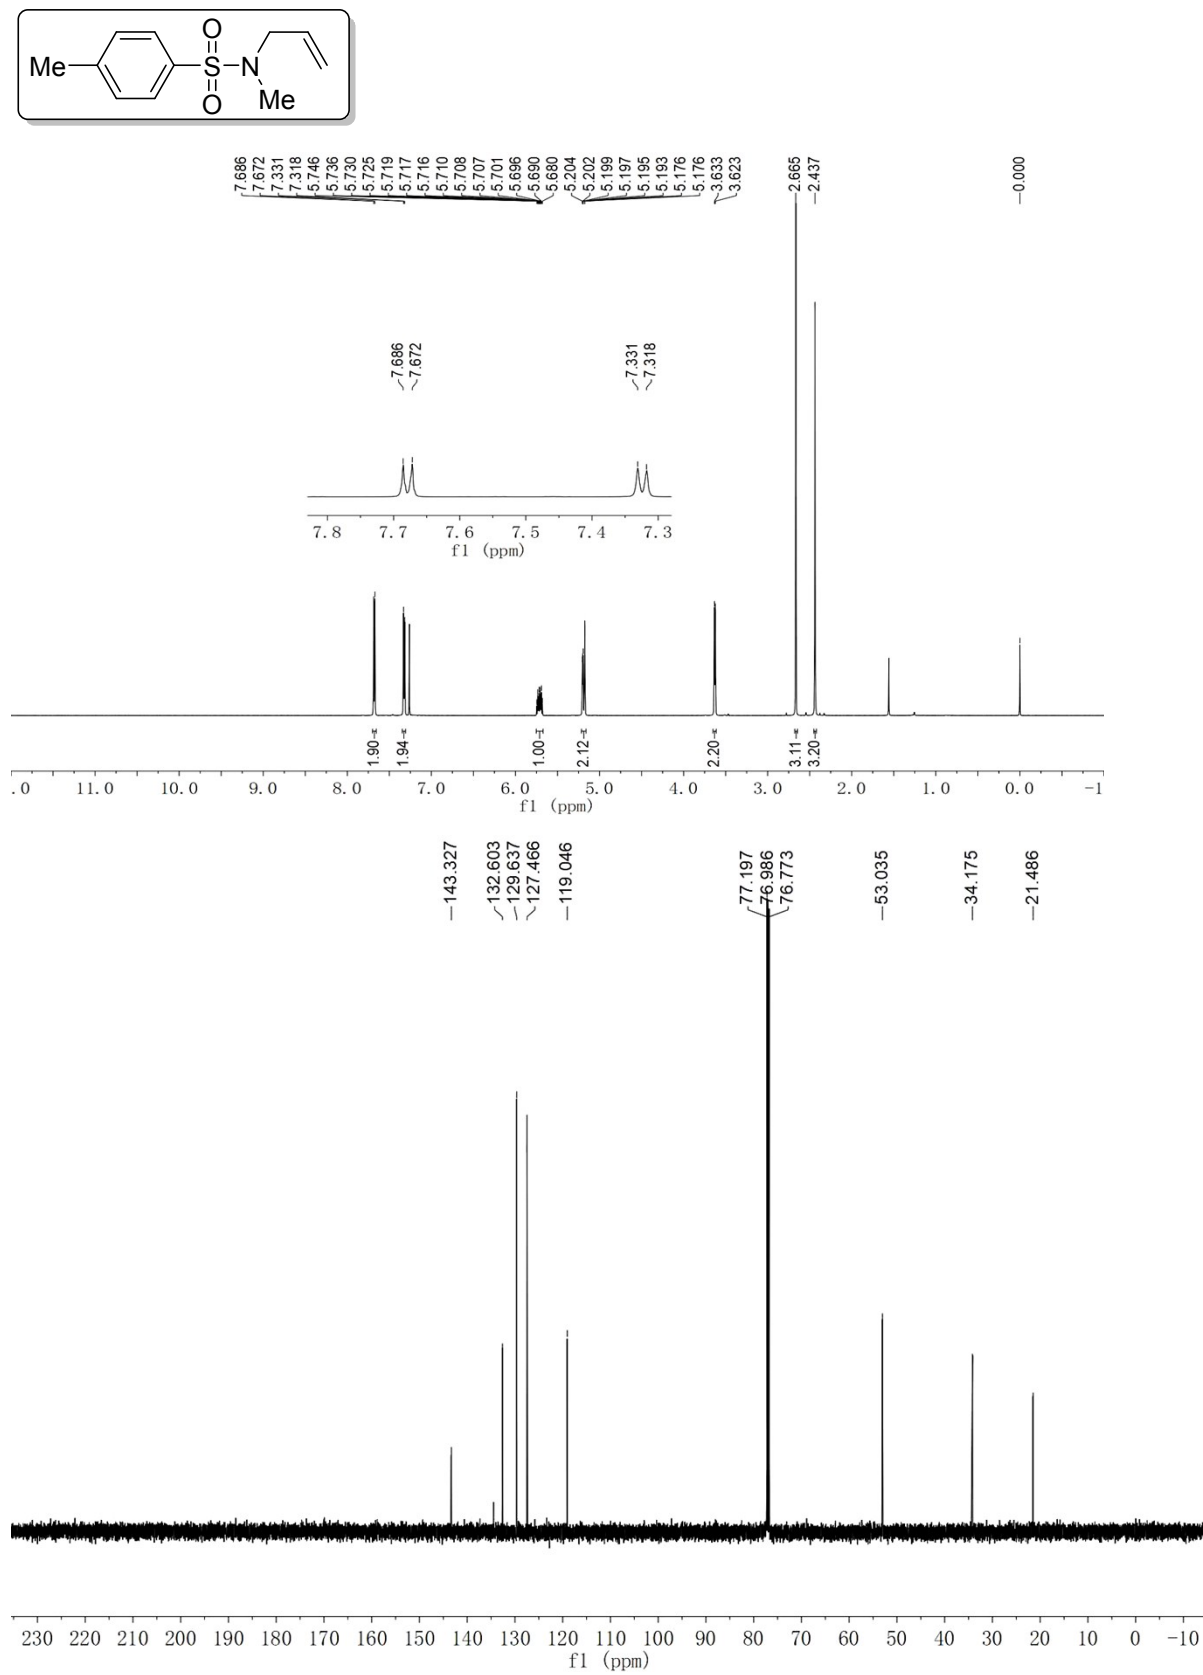

Figure S16. <sup>1</sup>H (600 MHz) and <sup>13</sup>C (151 MHz) NMR spectra of 5b in CDCl<sub>3</sub>.

Ethyl *N*-methyl-*N*-tosylglycinate (5c)

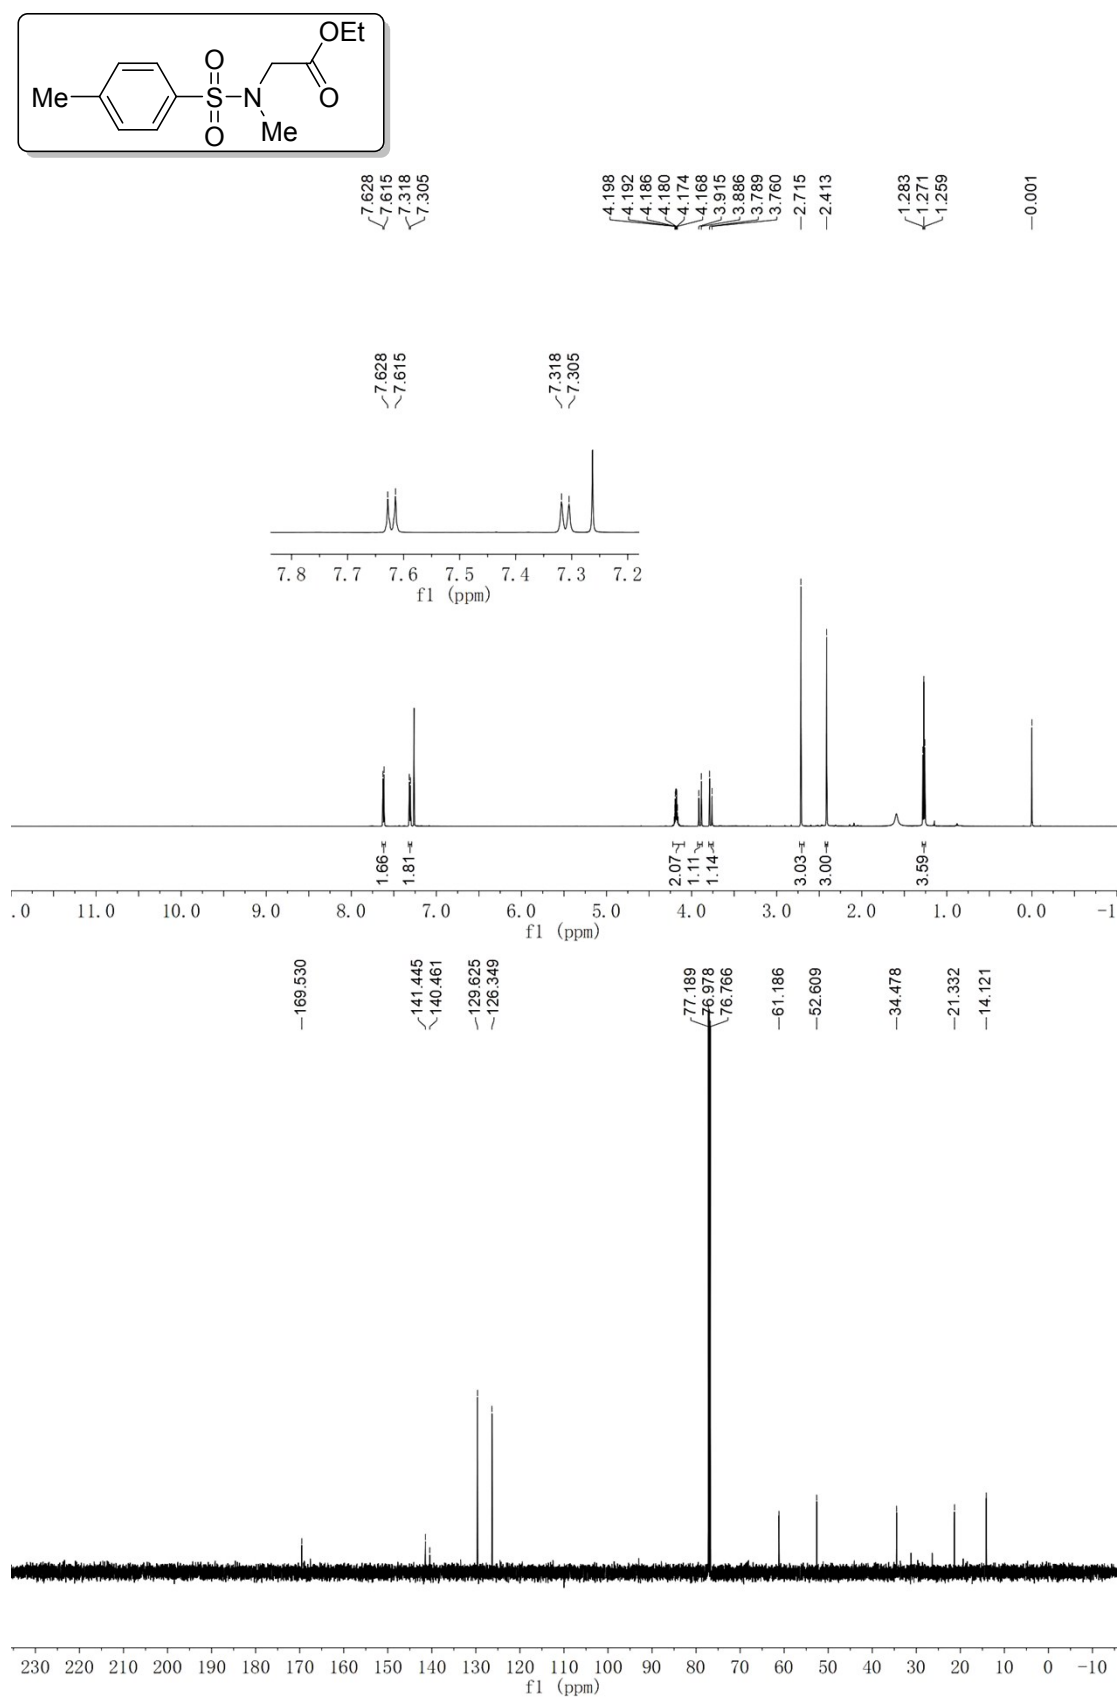

Figure S17. <sup>1</sup>H (600 MHz) and <sup>13</sup>C (151 MHz) NMR spectra of 5c in CDCl<sub>3</sub>.

*N*,4-Dimethyl-*N*-(2-oxo-2-phenylethyl)benzenesulfonamide (5d)

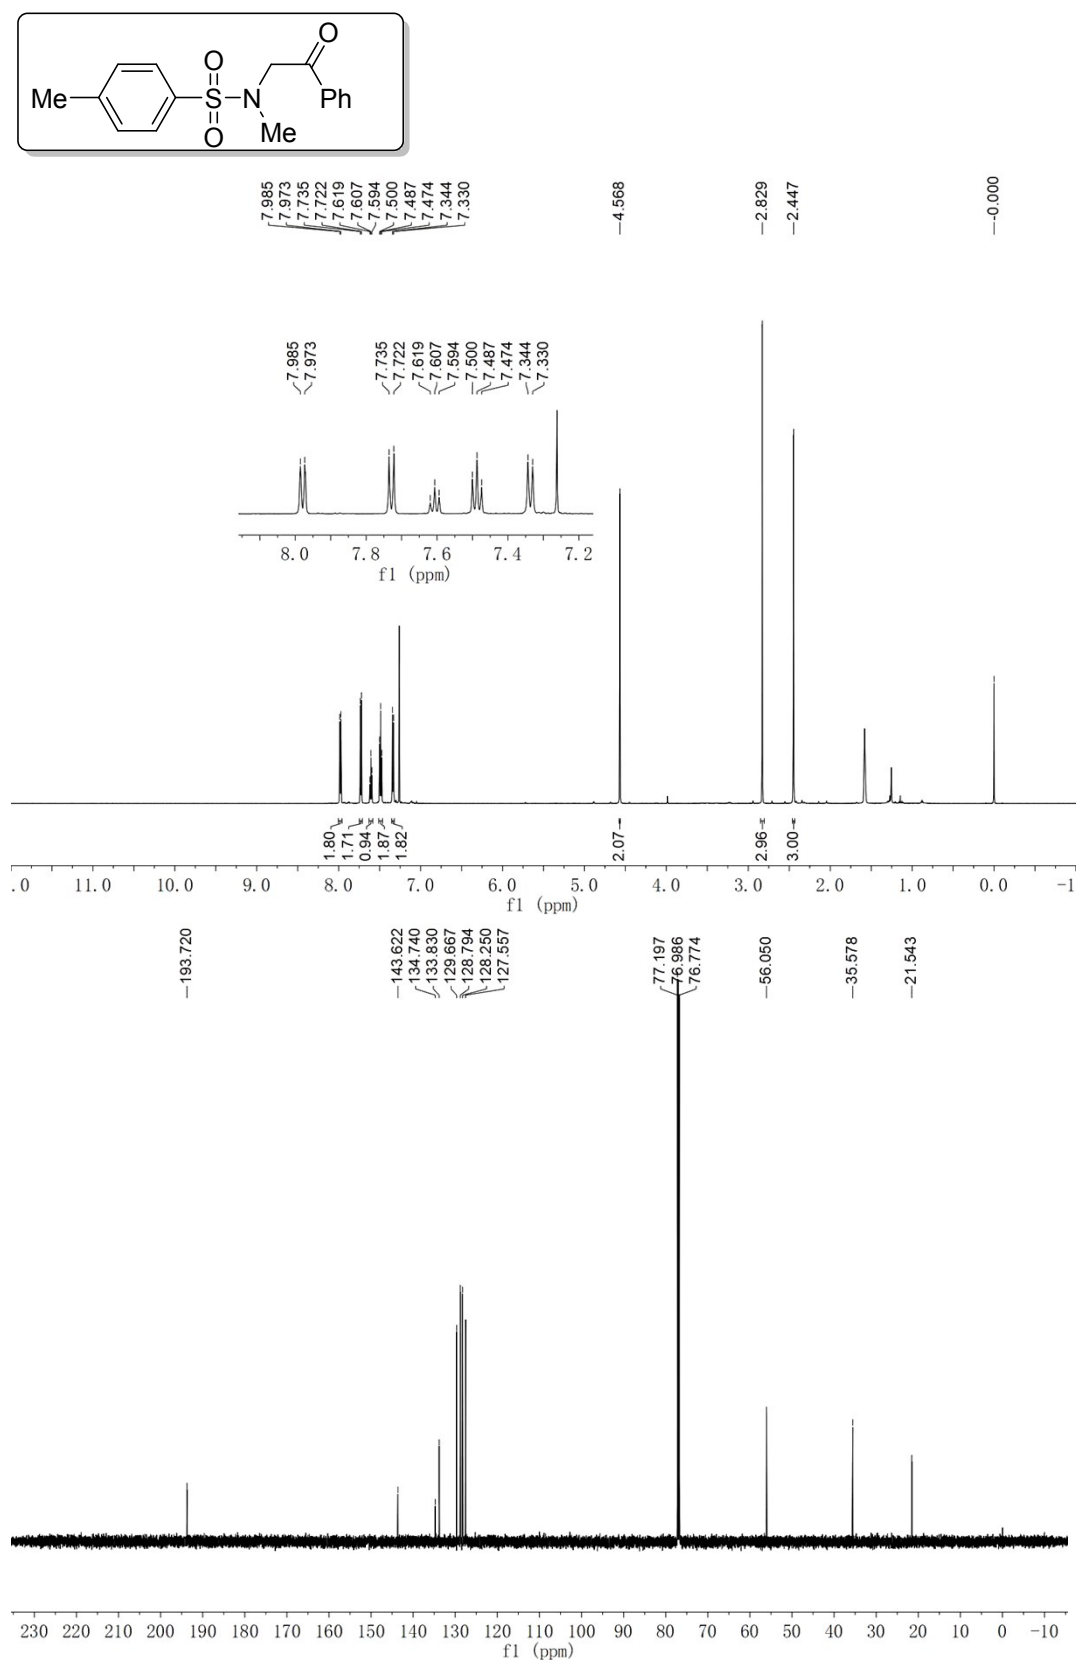

Figure S18. <sup>1</sup>H (600 MHz) and <sup>13</sup>C (151 MHz) NMR spectra of 5d in CDCl<sub>3</sub>.

*N*-Ethyl-4-methyl-*N*-propylbenzenesulfonamide (5e)

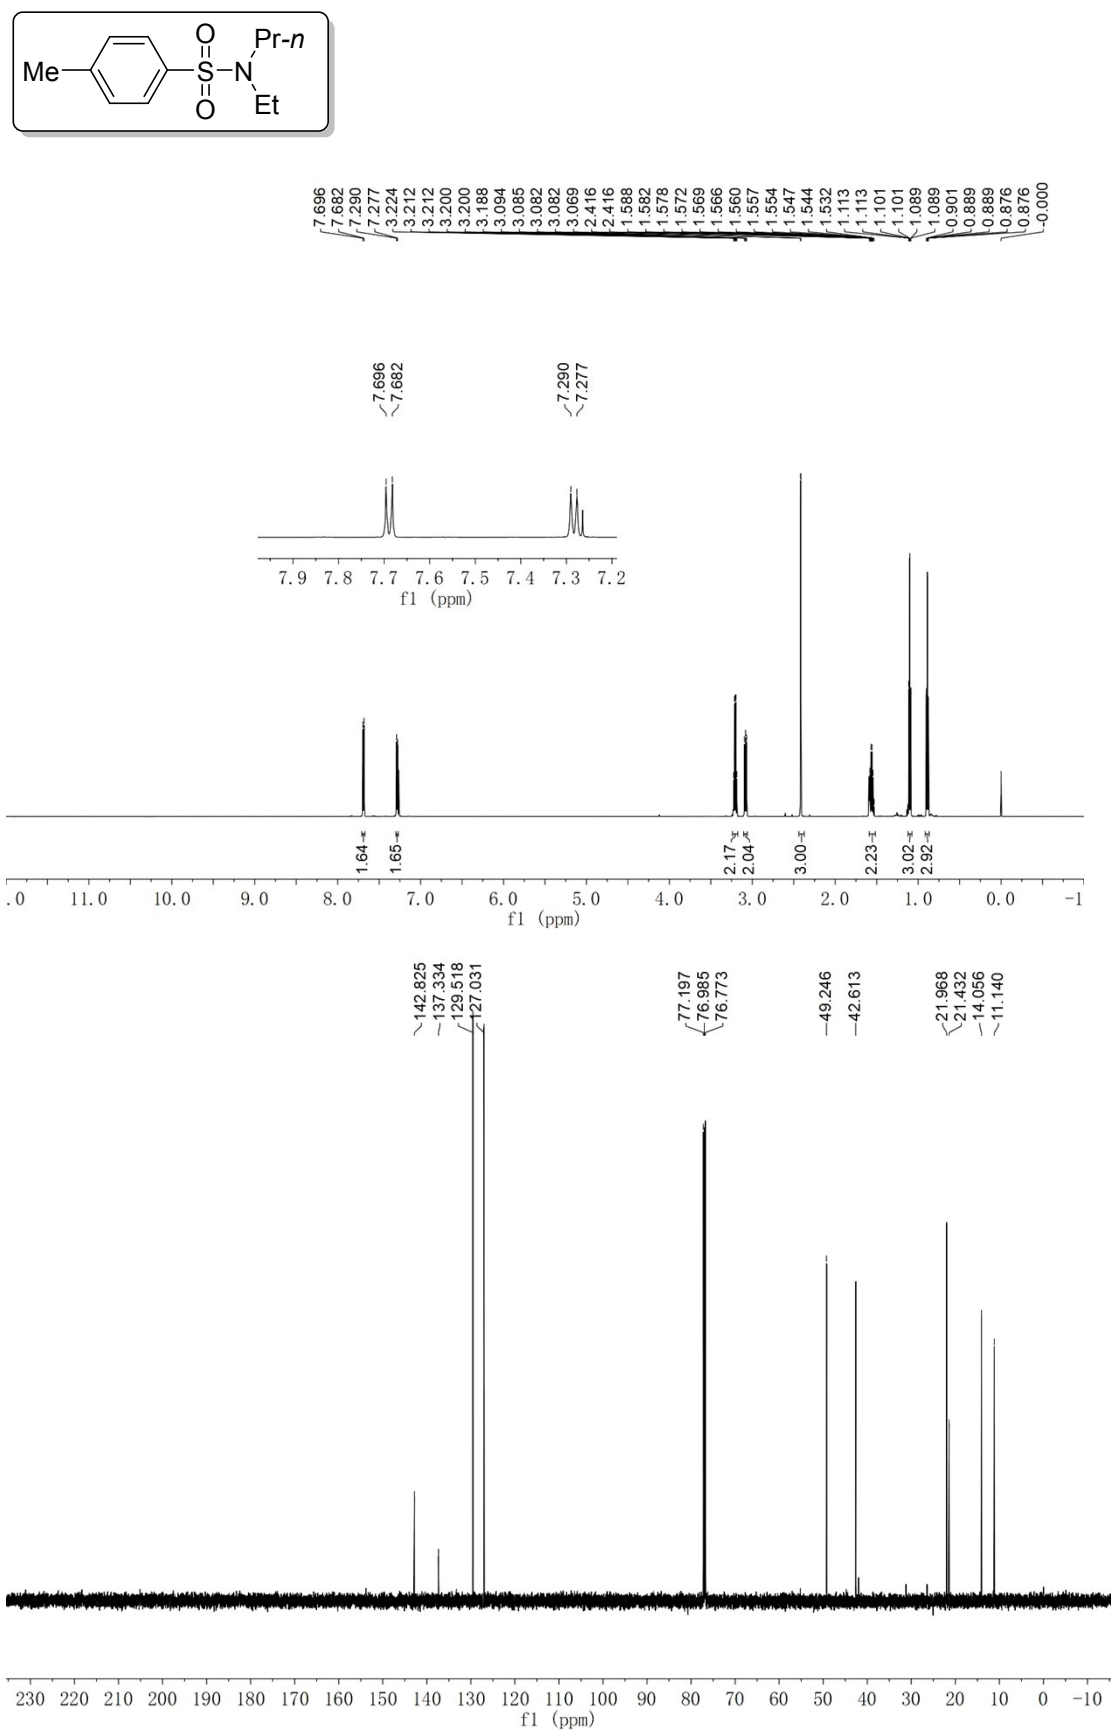

Figure S19. <sup>1</sup>H (600 MHz) and <sup>13</sup>C (151 MHz) NMR spectra of 5e in CDCl<sub>3</sub>.

*N,N*-diethyl-4-methylbenzenesulfonamide (5f)

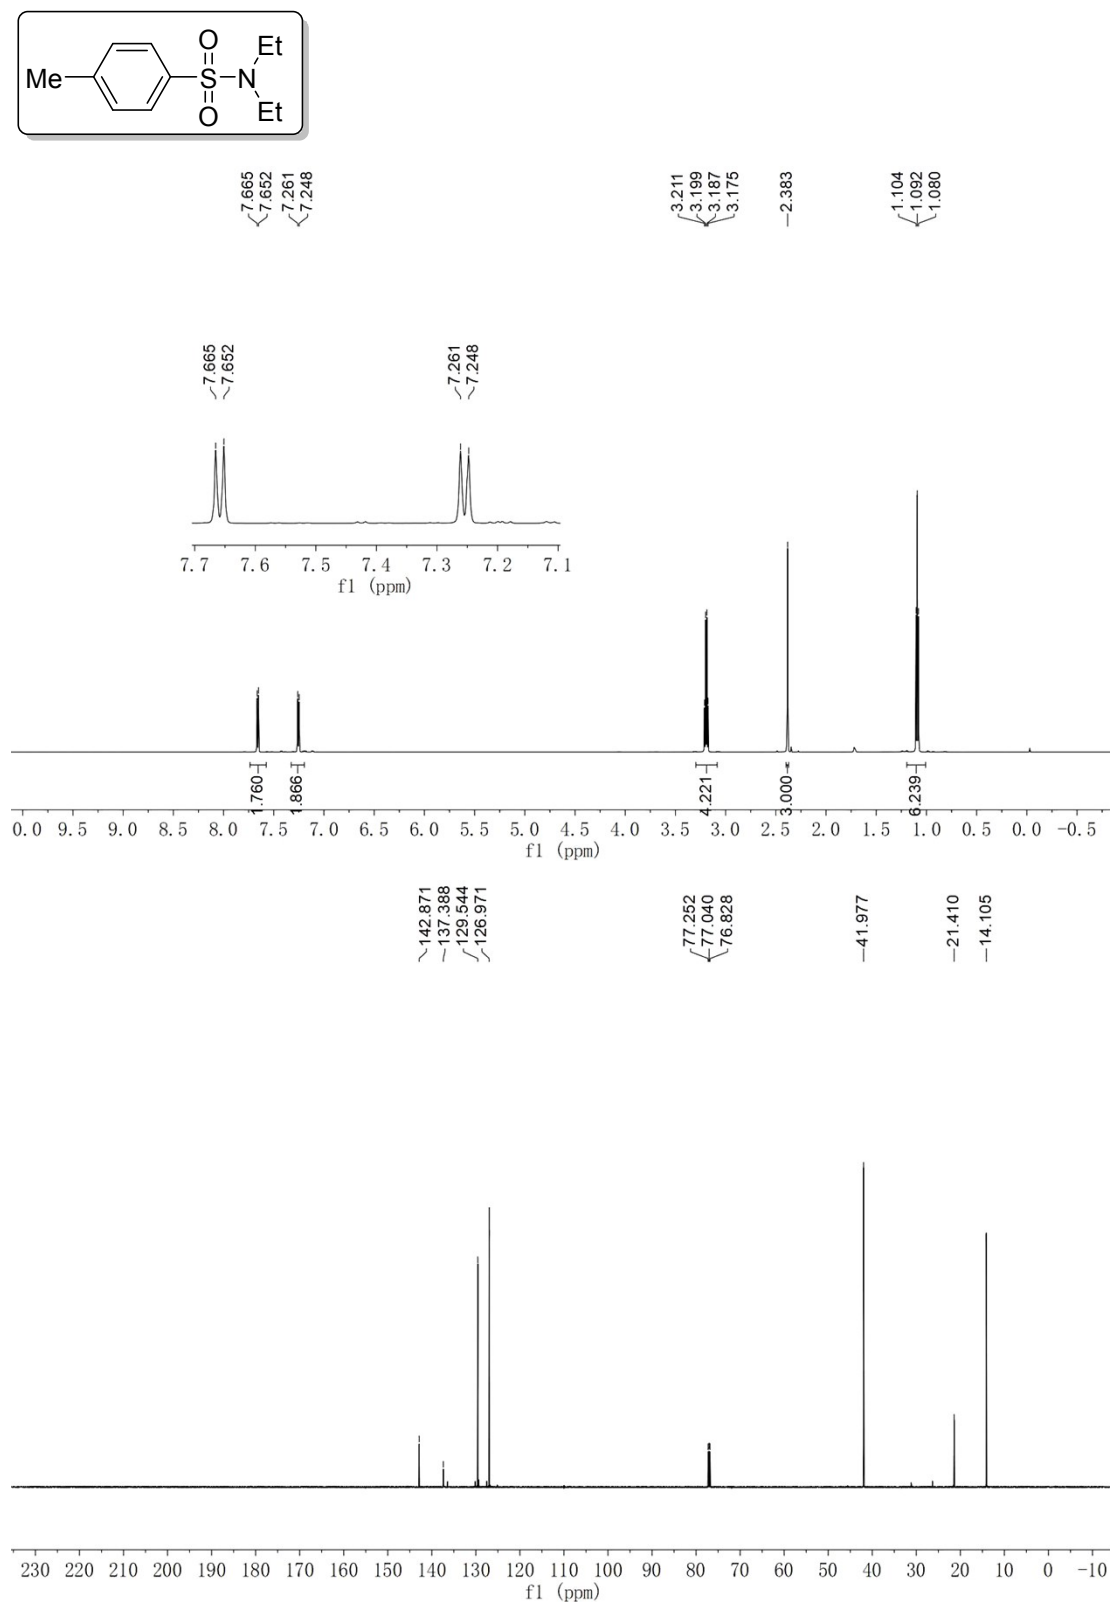

Figure S20. <sup>1</sup>H (600 MHz) and <sup>13</sup>C (151 MHz) NMR spectra of 5f in CDCl<sub>3</sub>.

*N*-(4-Chlorobenzyl)-*N*-ethyl-4-methylbenzenesulfonamide (5g)

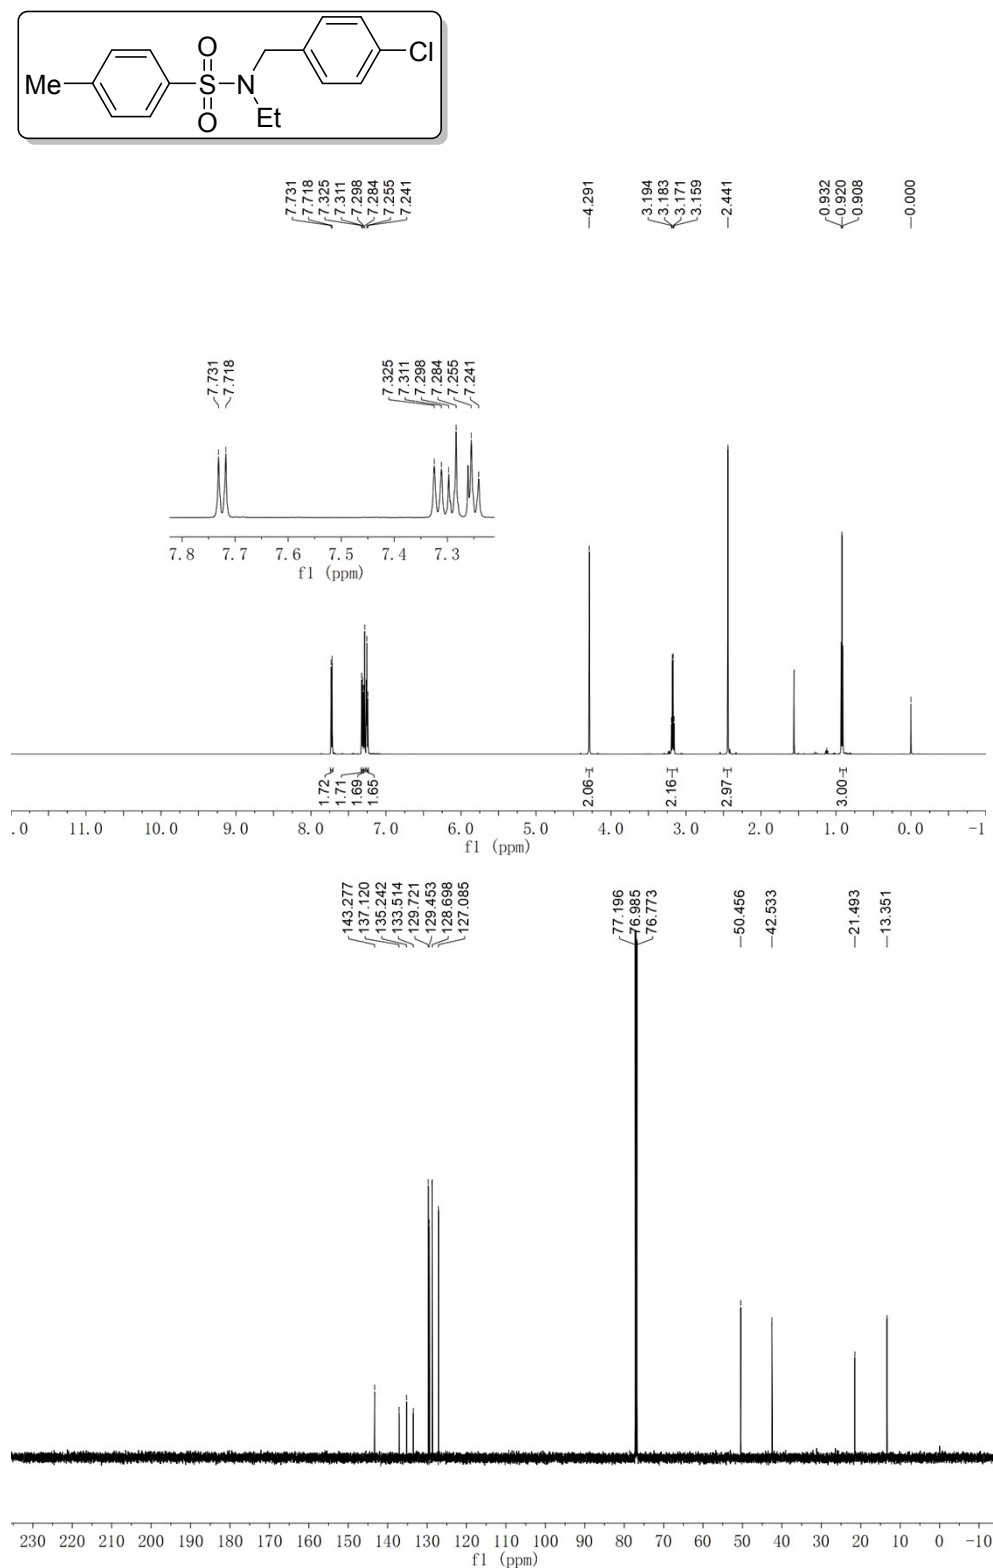

Figure S21. <sup>1</sup>H (600 MHz) and <sup>13</sup>C (151 MHz) NMR spectra of 5g in CDCl<sub>3</sub>.

N-(4-Chlorobenzyl)-4-methyl-N-propylbenzenesulfonamide (5h)

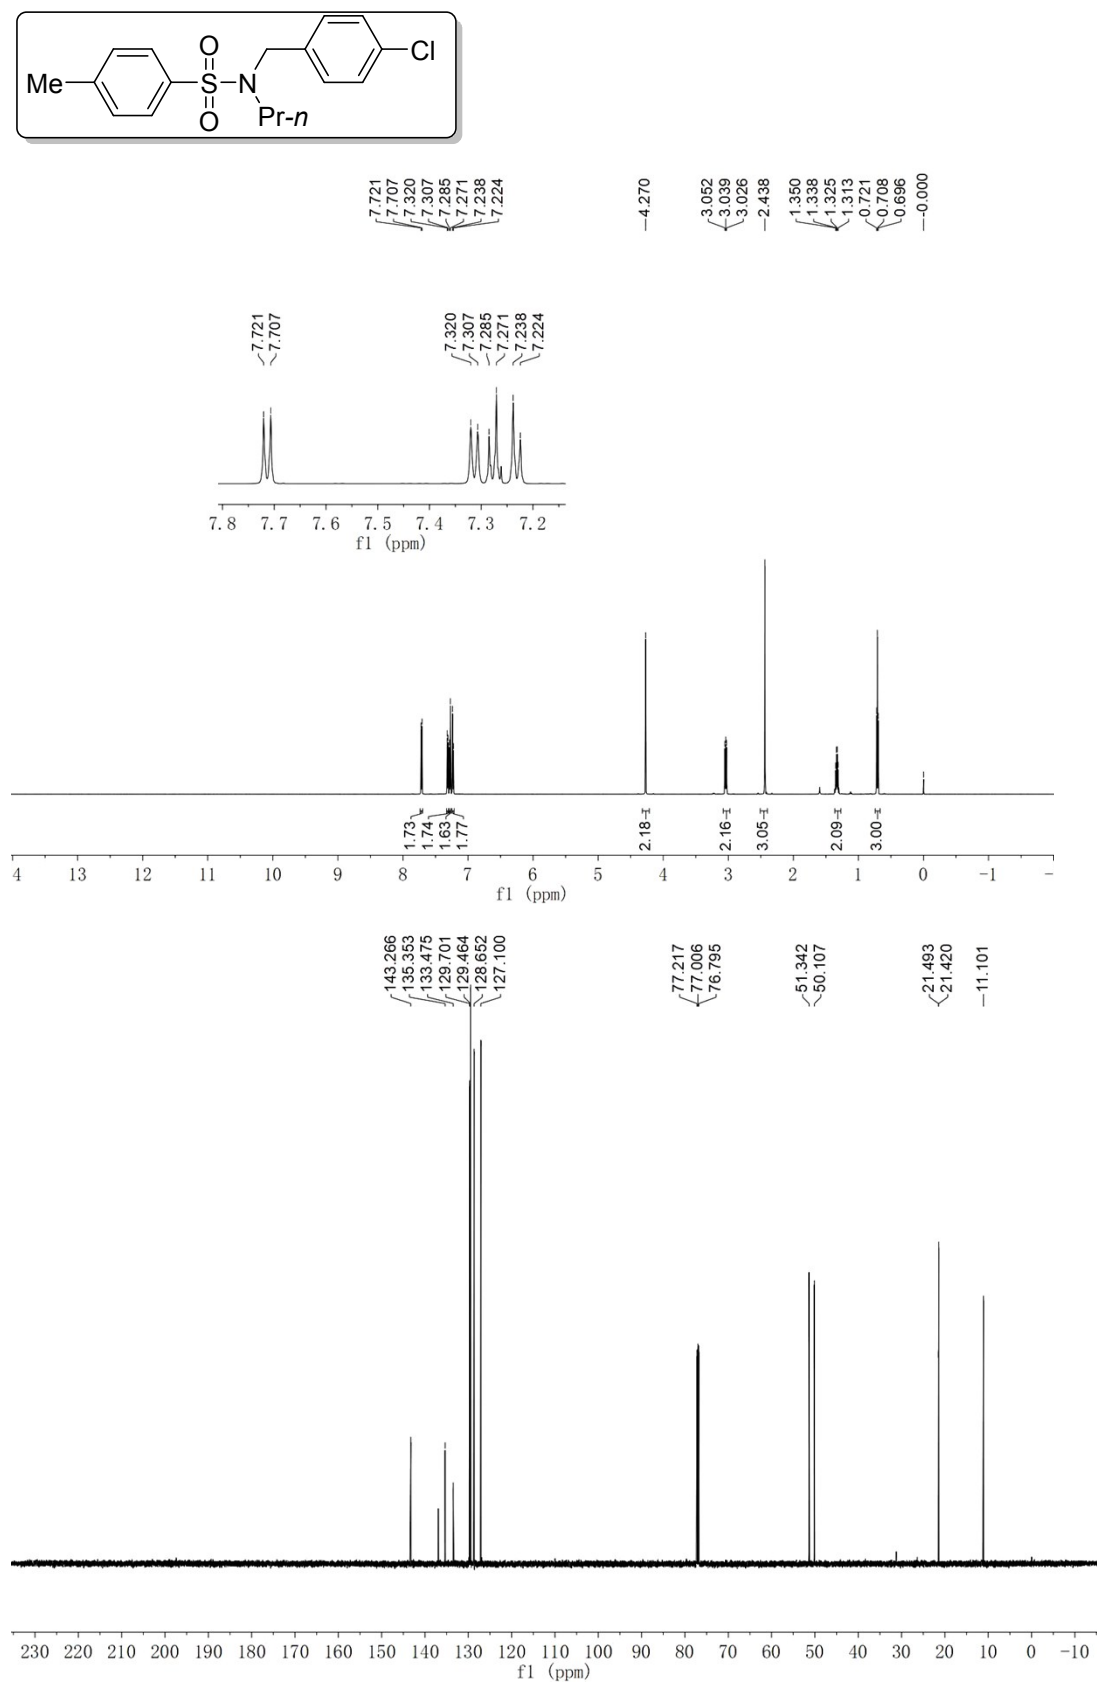

**Figure S22.** <sup>1</sup>H (600 MHz) and <sup>13</sup>C (151 MHz) NMR spectra of **5h** in CDCl<sub>3</sub>.

***N*-Benzyl-*N*-(4-chlorobenzyl)-4-methylbenzenesulfonamide (**5i**)**



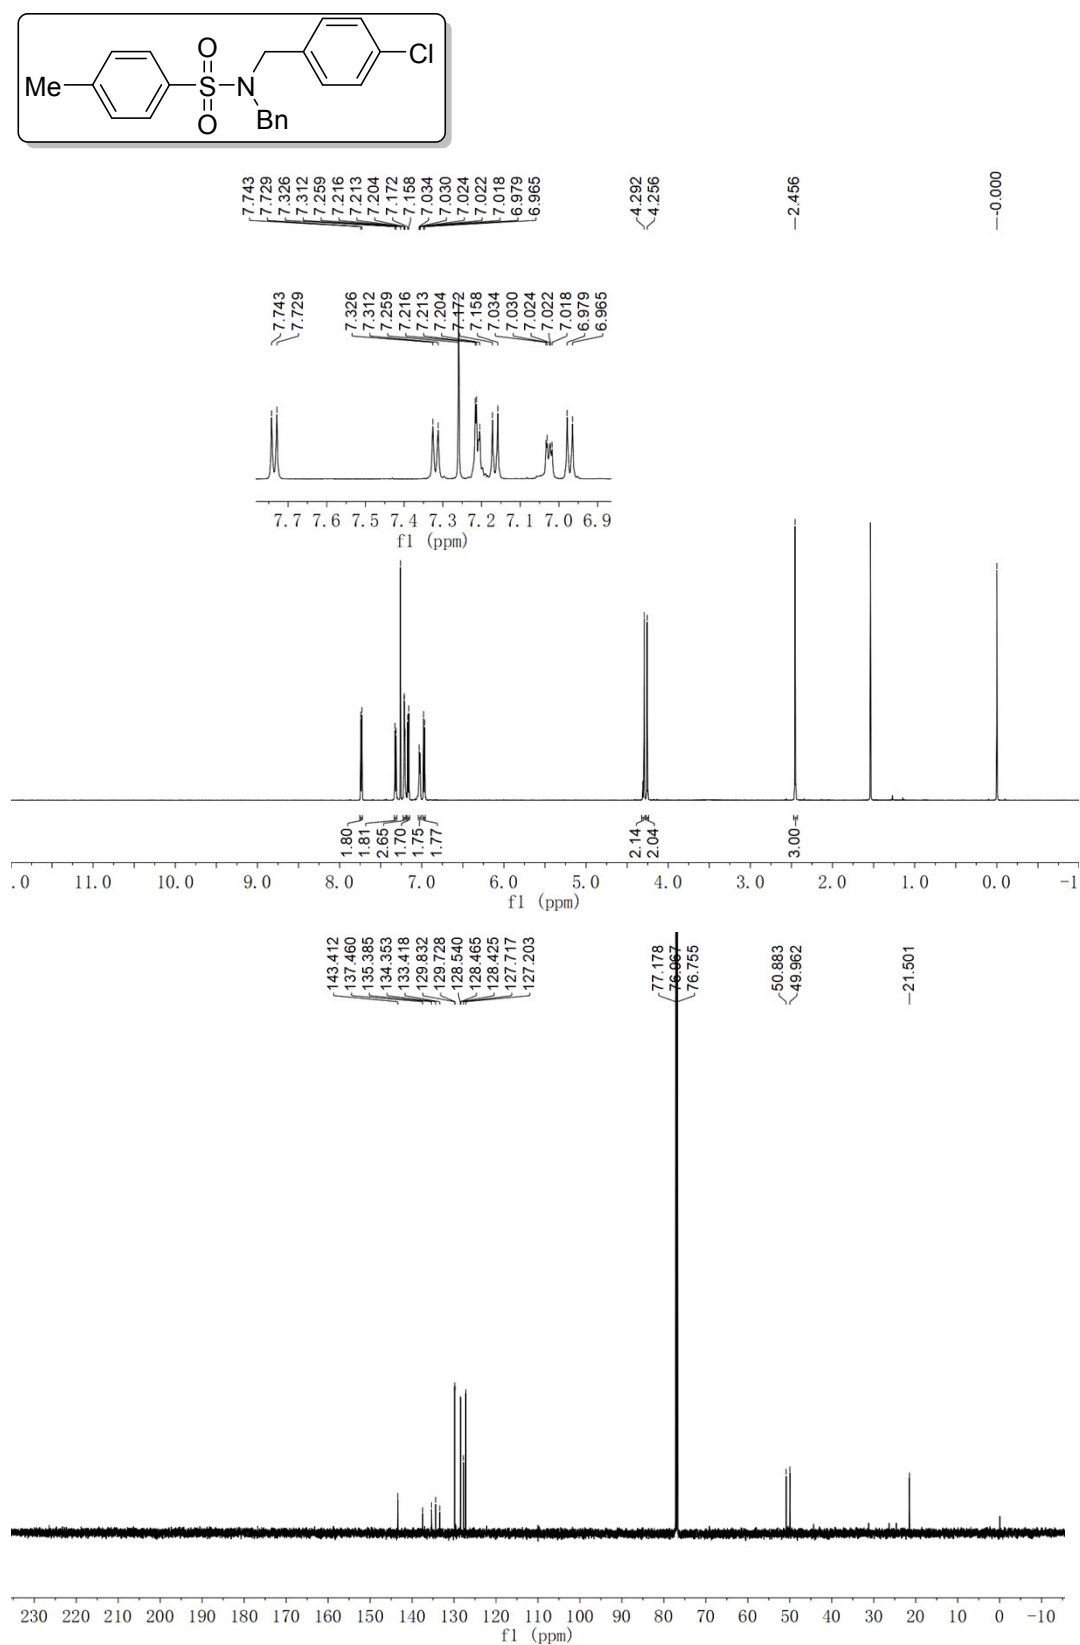

Figure S23. <sup>1</sup>H (600 MHz) and <sup>13</sup>C (151 MHz) NMR spectra of 5i in CDCl<sub>3</sub>.

4-Methoxy-N-(2-oxo-2-phenylethyl)-N-propylbenzenesulfonamide (5j)

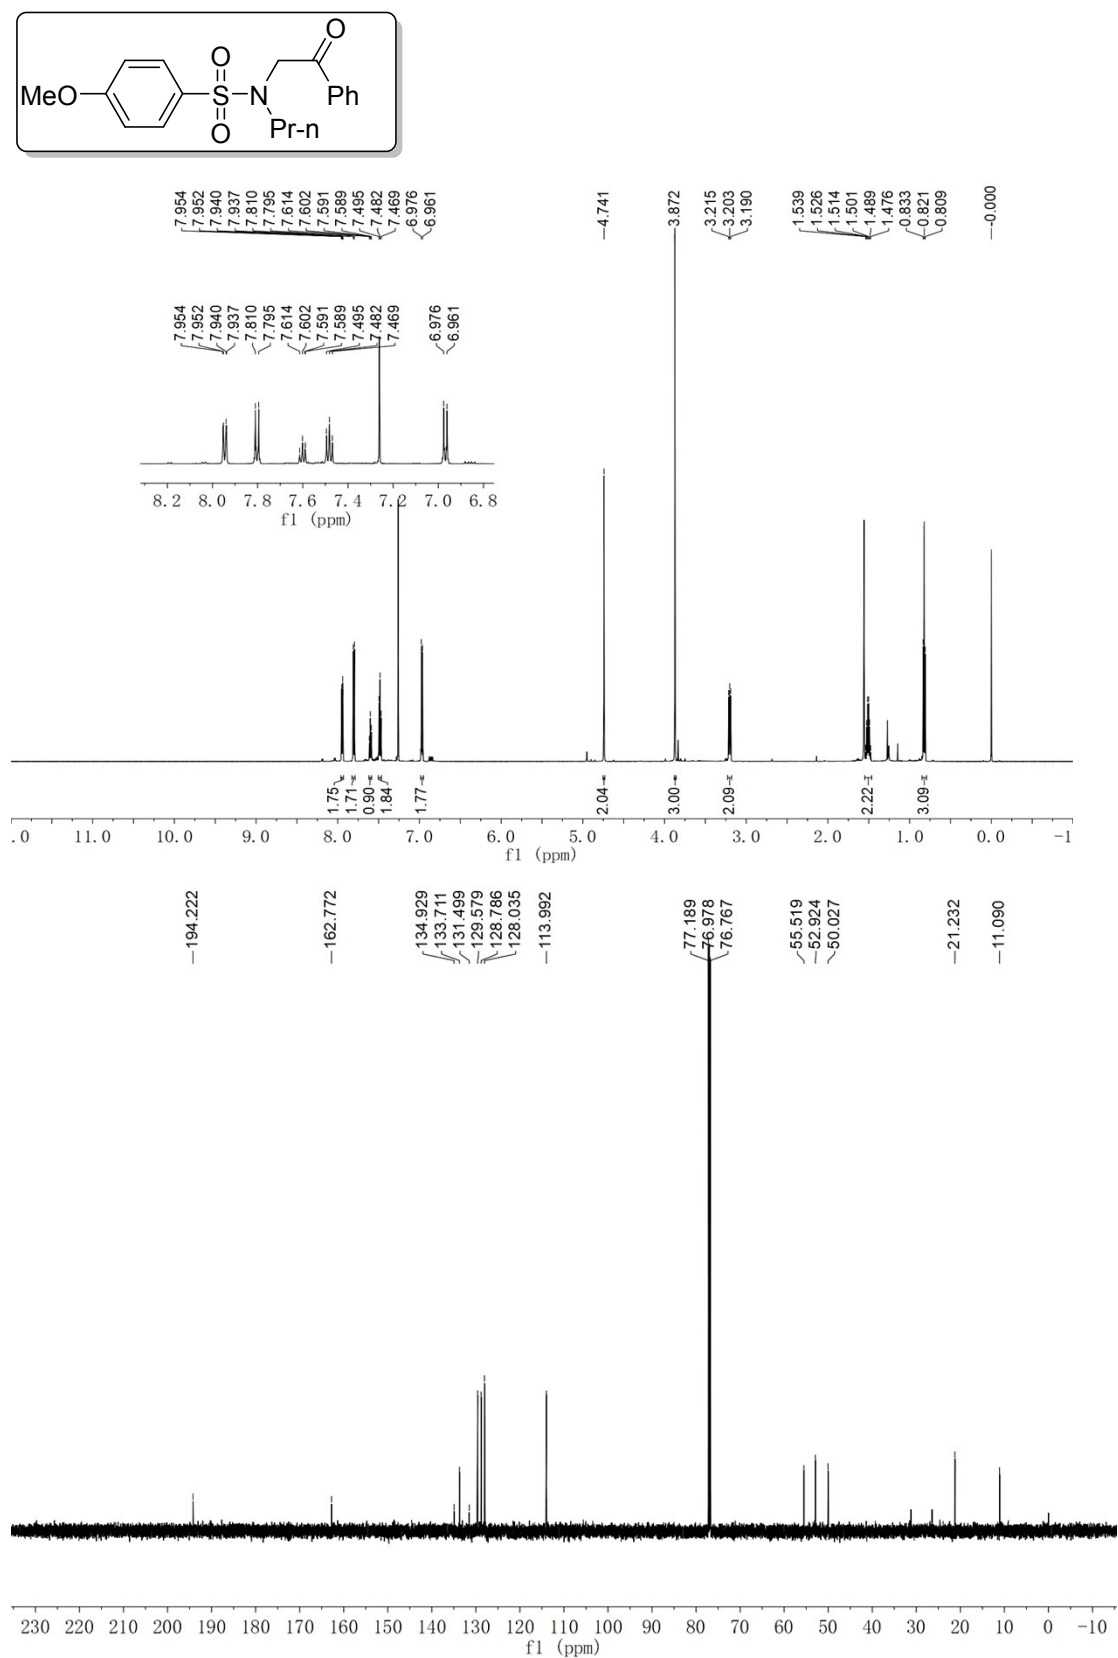

Figure S24. <sup>1</sup>H (600 MHz) and <sup>13</sup>C (151 MHz) NMR spectra of 5j in CDCl<sub>3</sub>.

*N*-(4-Chlorobenzyl)-*N*-ethylbenzenesulfonamide (5k)

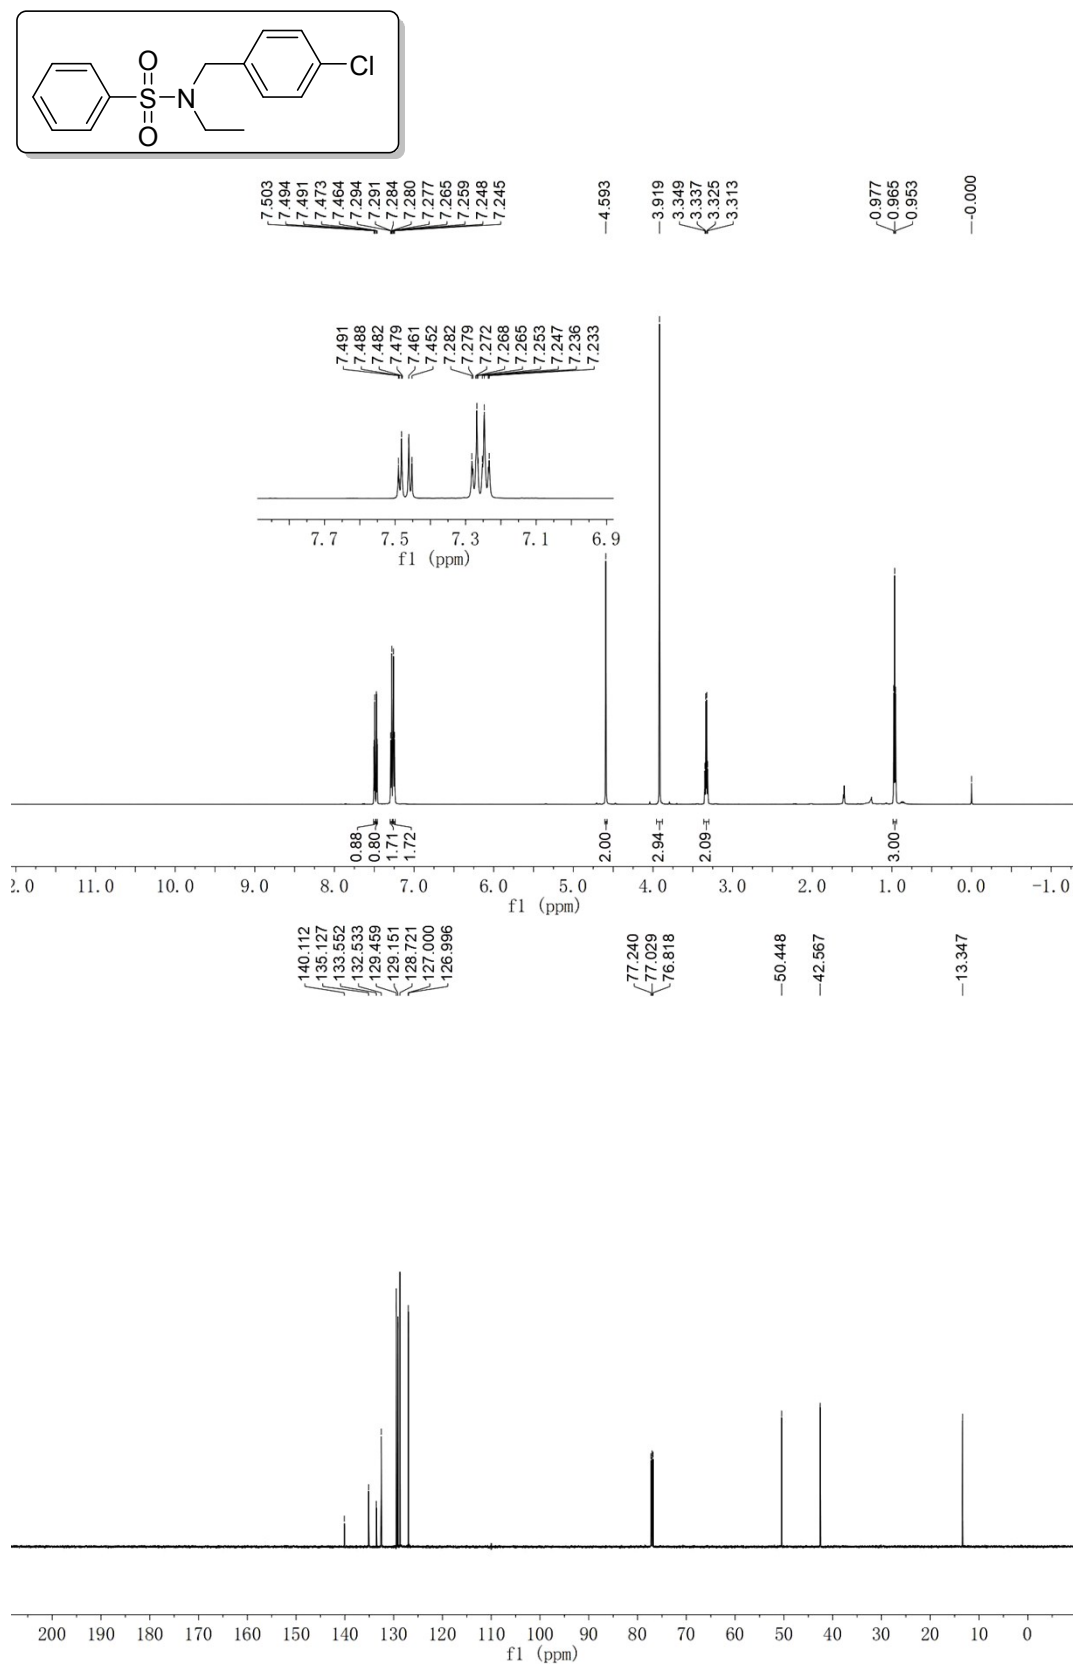

Figure S25. <sup>1</sup>H (600 MHz) and <sup>13</sup>C (151 MHz) NMR spectra of 5k in CDCl<sub>3</sub>.

Ethyl-N-(2-oxo-2-phenylethyl)naphthalene-2-sulfonamide (5l)

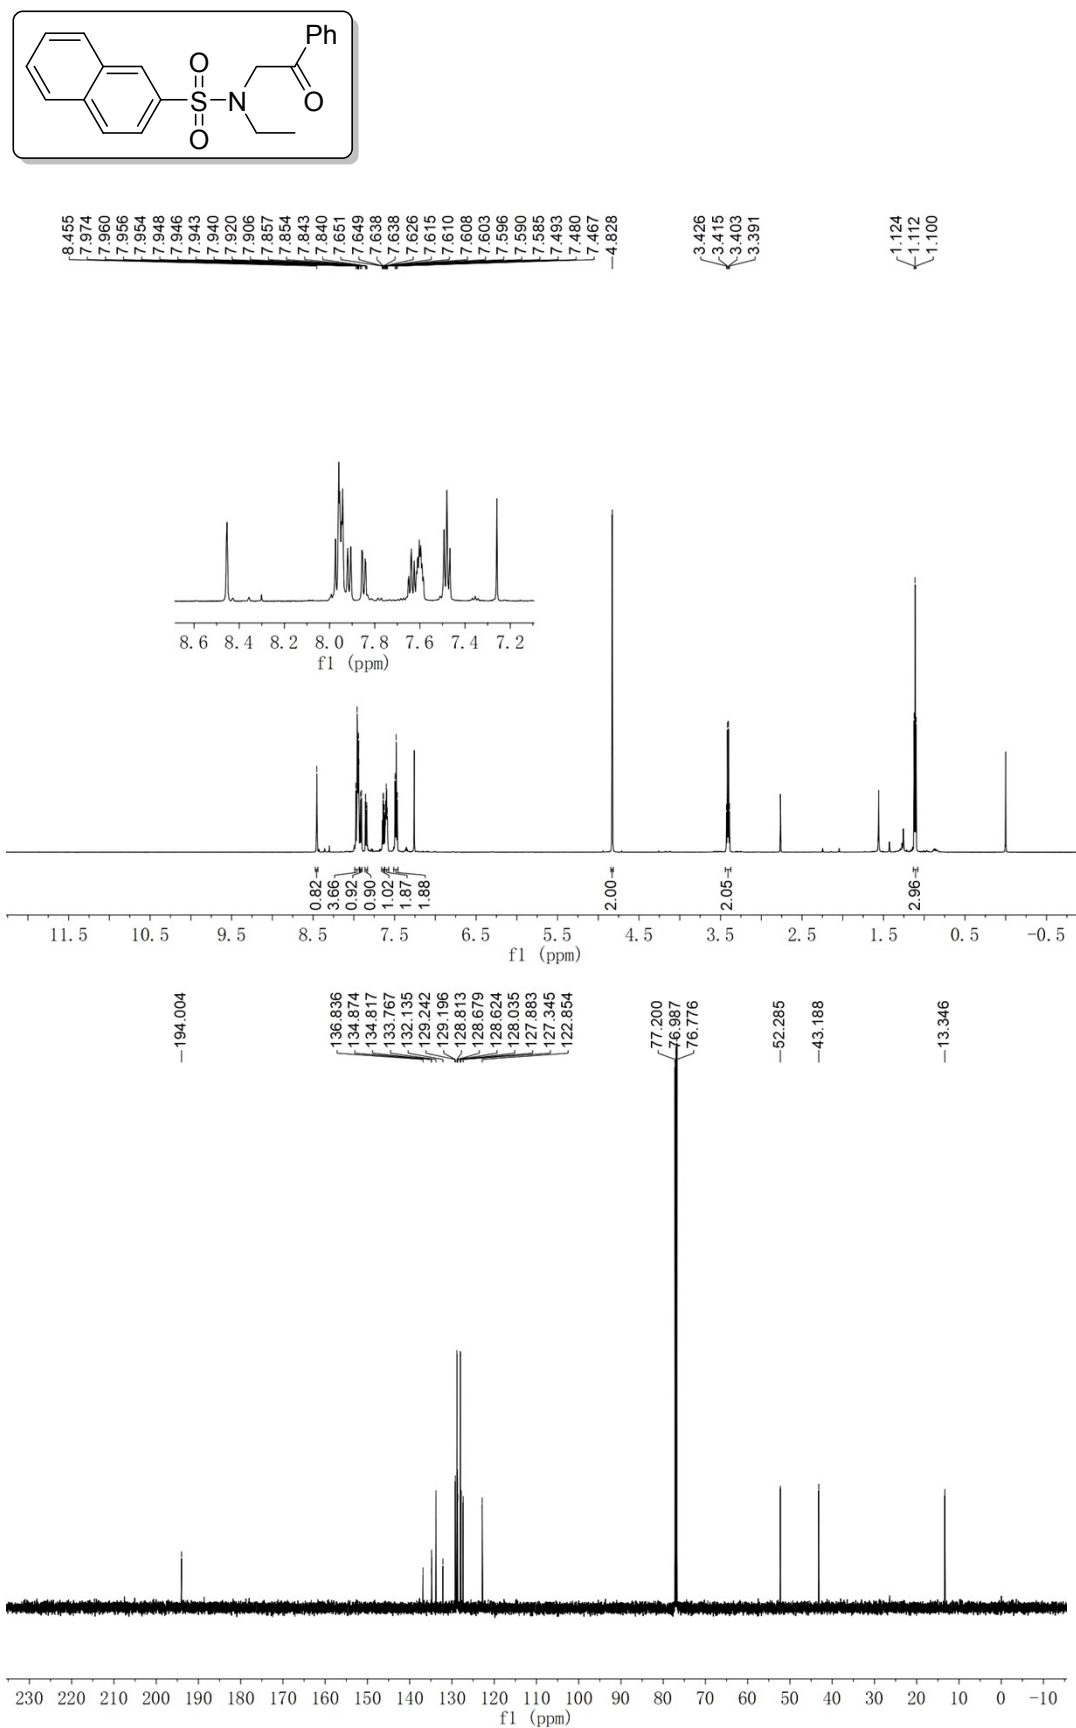

**Figure S26.** <sup>1</sup>H (600 MHz) and <sup>13</sup>C (151 MHz) NMR spectra of 5l in CDCl<sub>3</sub>.  
*N,N*-Diethylthiophene-2-sulfonamide (5m)

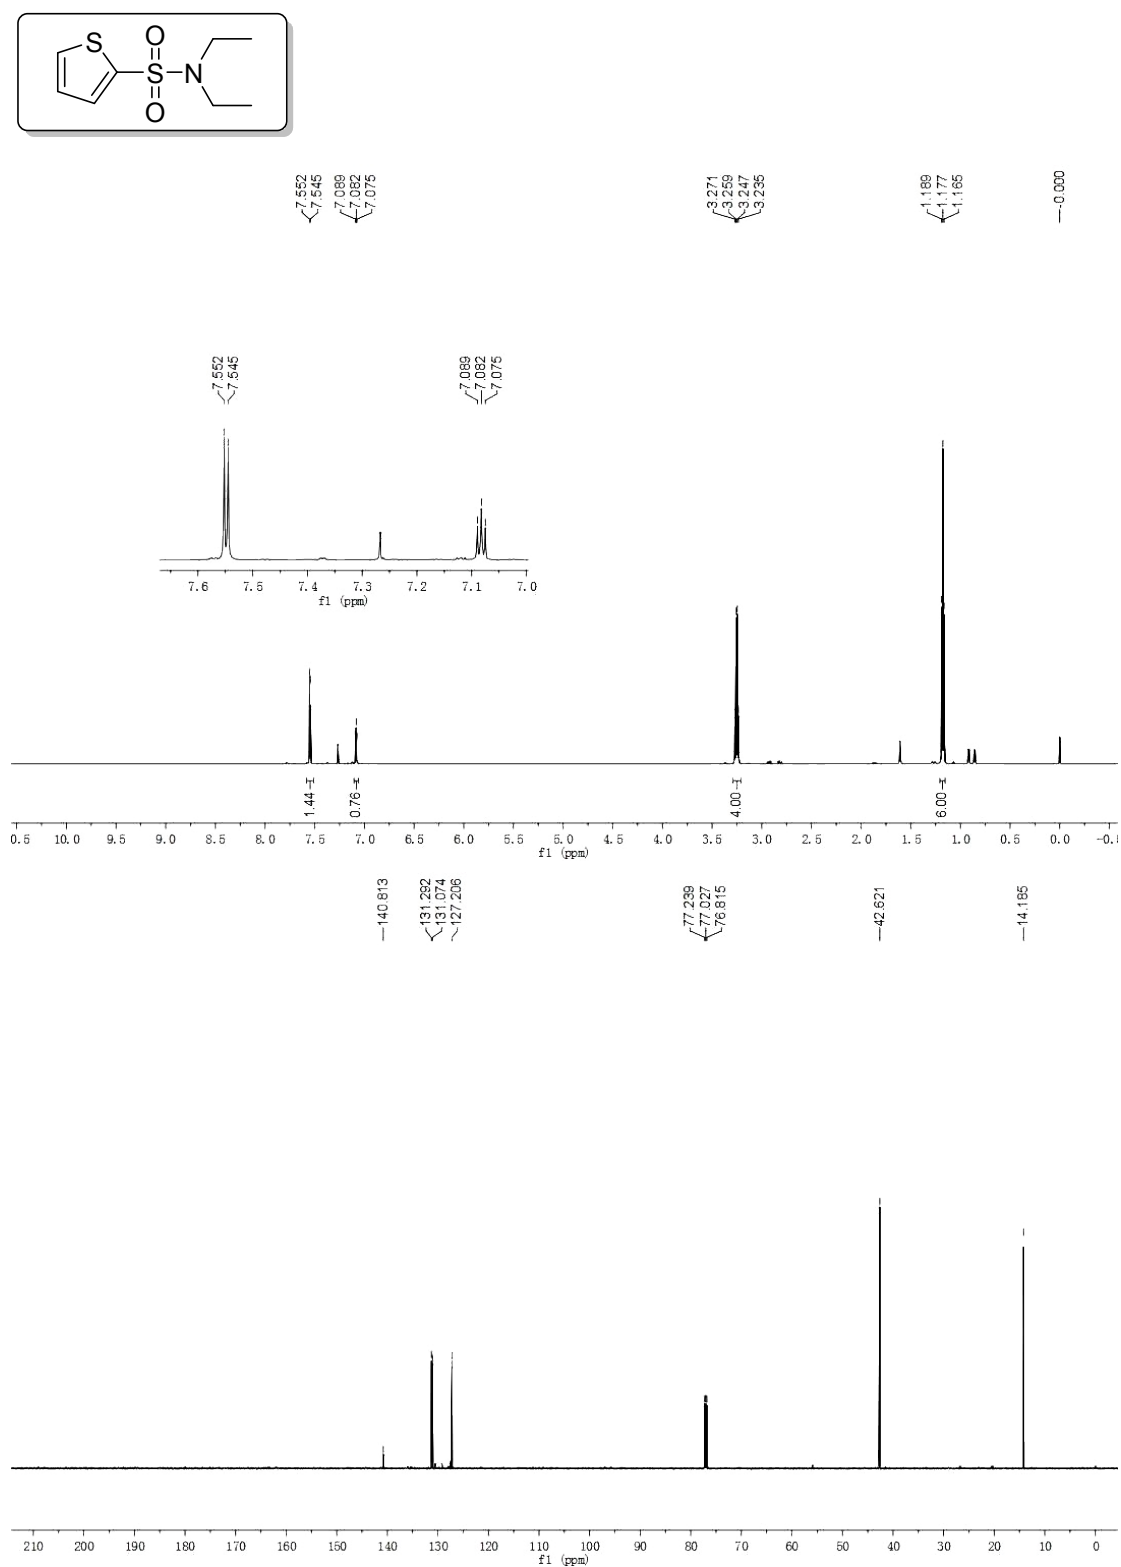

Figure S27. <sup>1</sup>H (600 MHz) and <sup>13</sup>C (151 MHz) NMR spectra of 5m in CDCl<sub>3</sub>.

Methyl 2-(*N*-(4-chlorobenzyl)-*N*-ethylsulfamoyl)thiophene-3-carboxylate (5n)

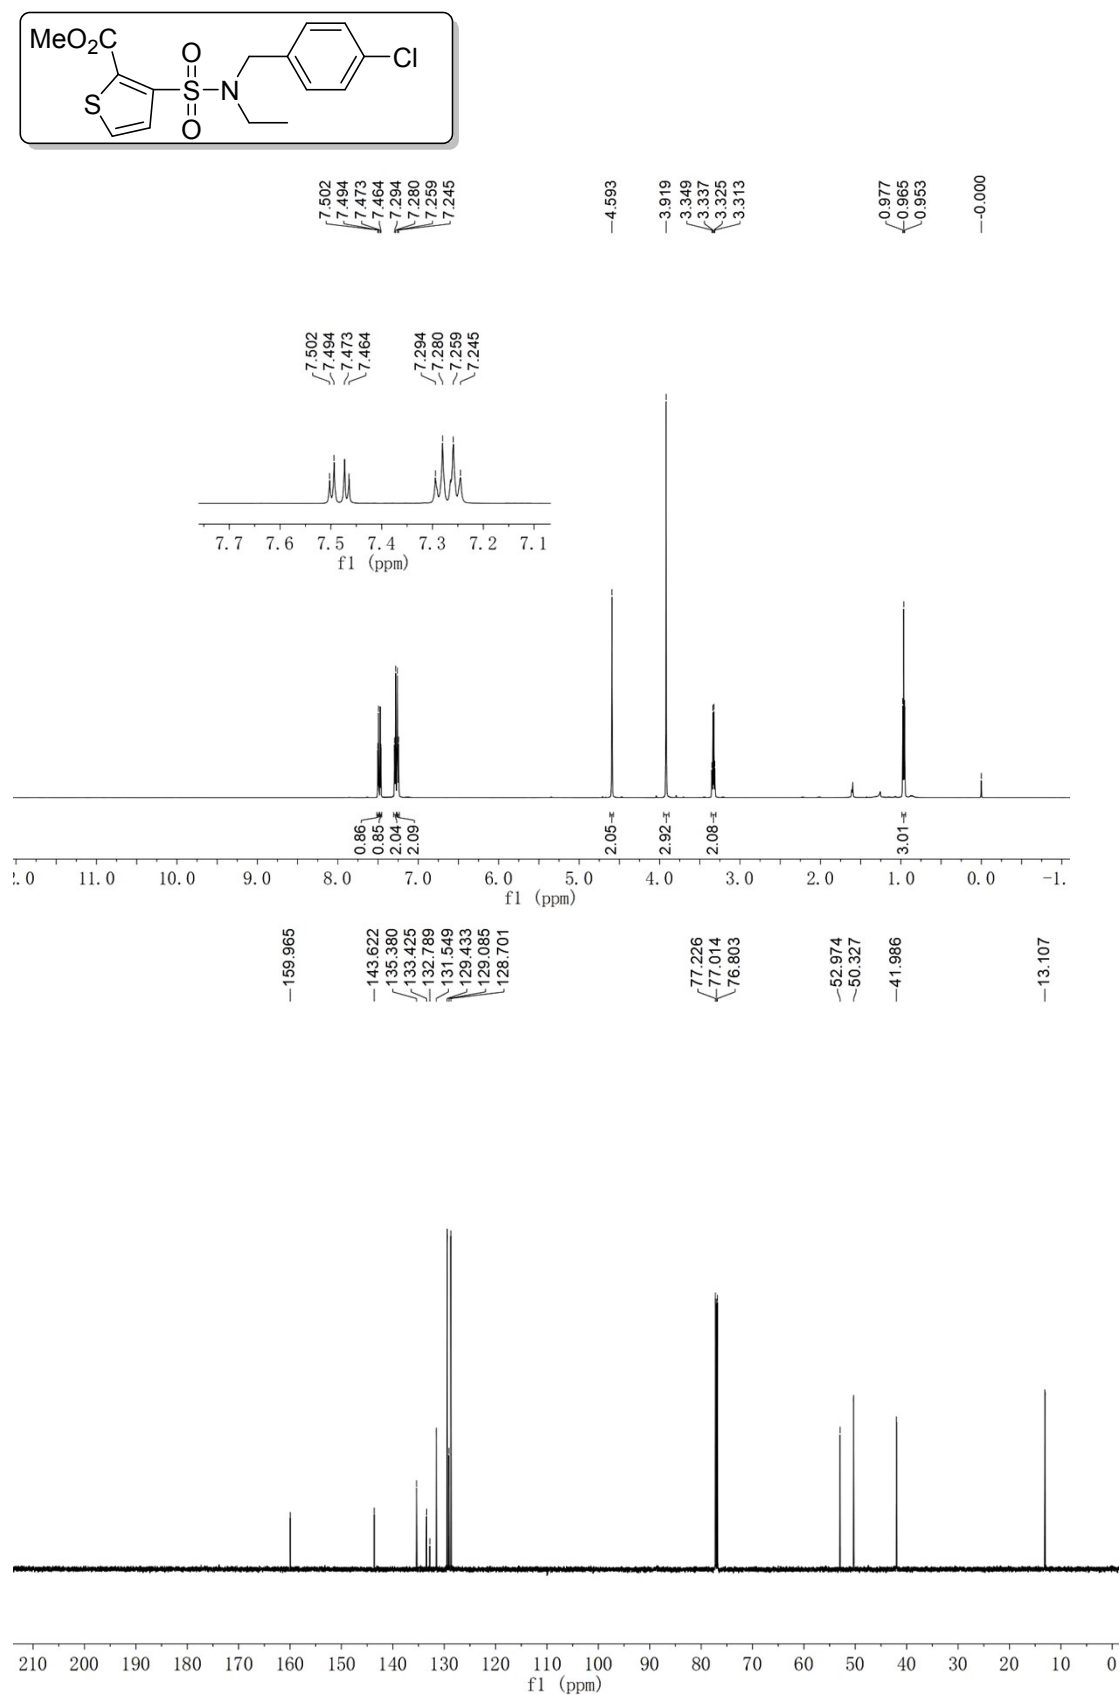

Figure S28. <sup>1</sup>H (600 MHz) and <sup>13</sup>C (151 MHz) NMR spectra of 5n in CDCl<sub>3</sub>.

*N*-Methyl-*N*-(2-oxo-2-phenylethyl)cyclopropanesulfonamide (5o)

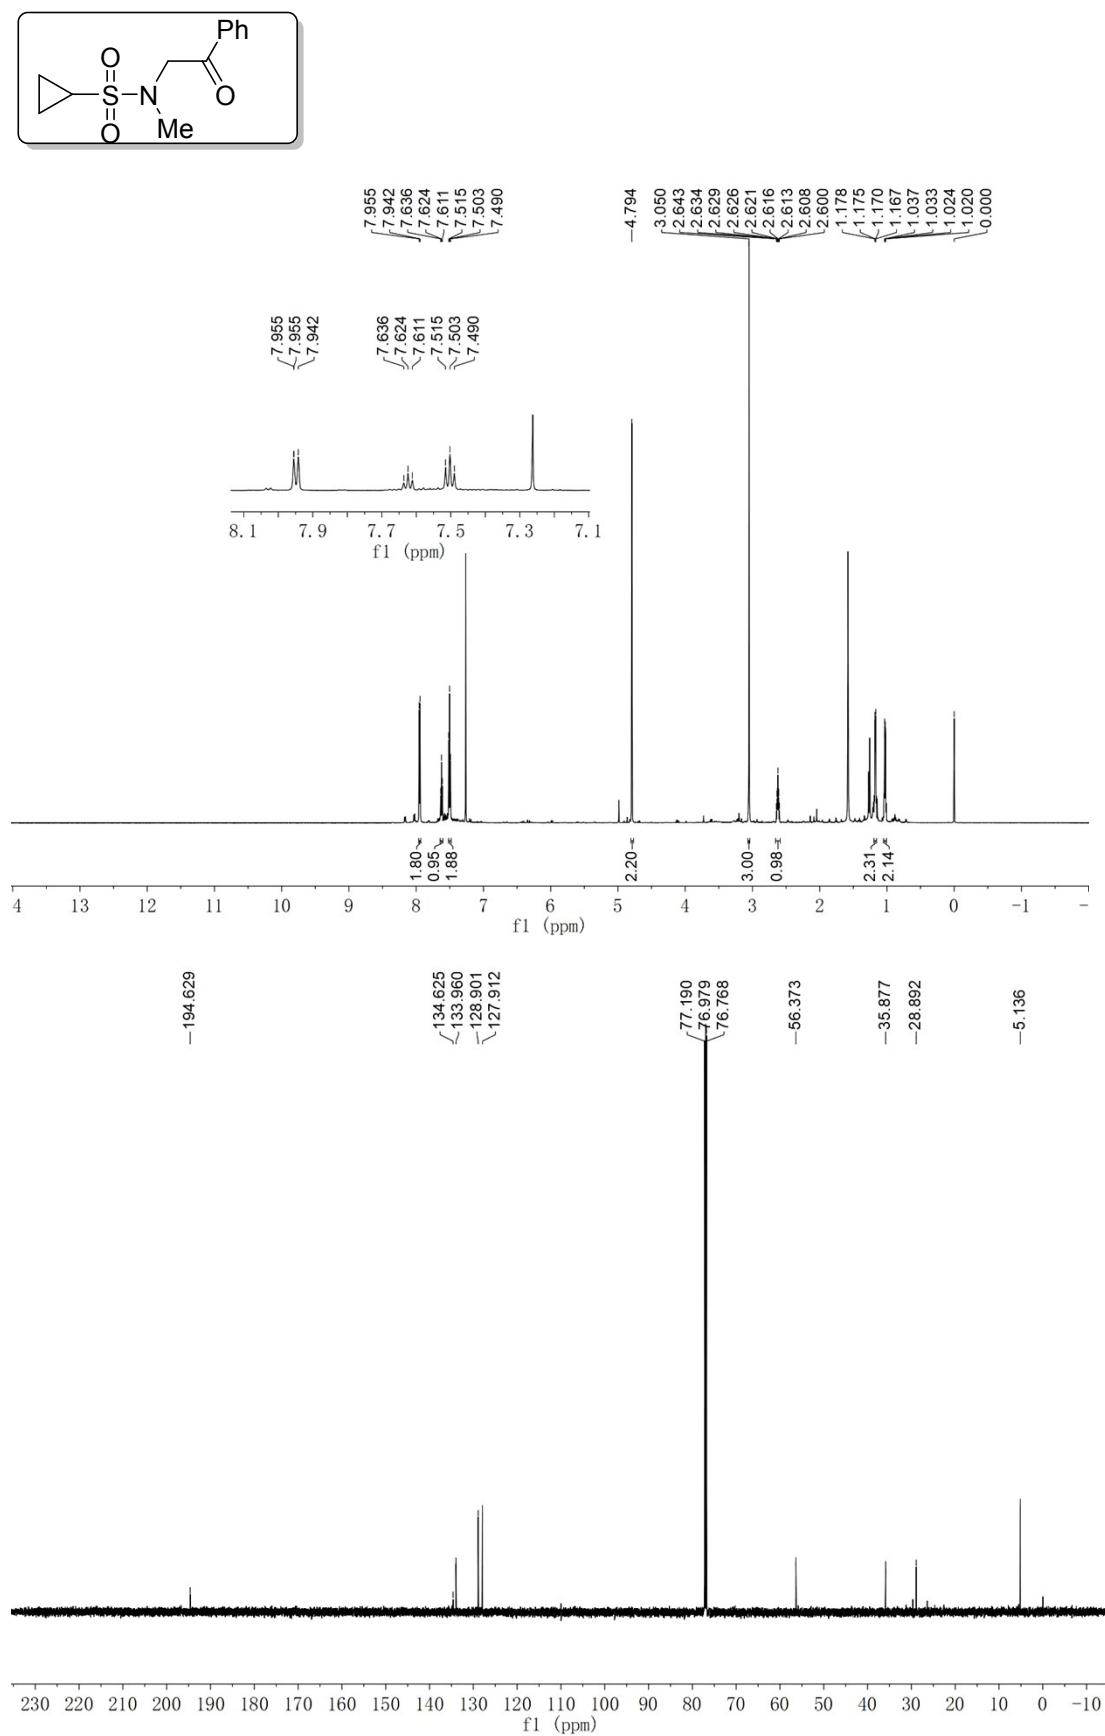

**Figure S29.** <sup>1</sup>H (600 MHz) and <sup>13</sup>C (151 MHz) NMR spectra of **50** in CDCl<sub>3</sub>.  
**2,2,6,6-Tetramethylpiperidin-1-yl 4-methylbenzenesulfonate (11)**

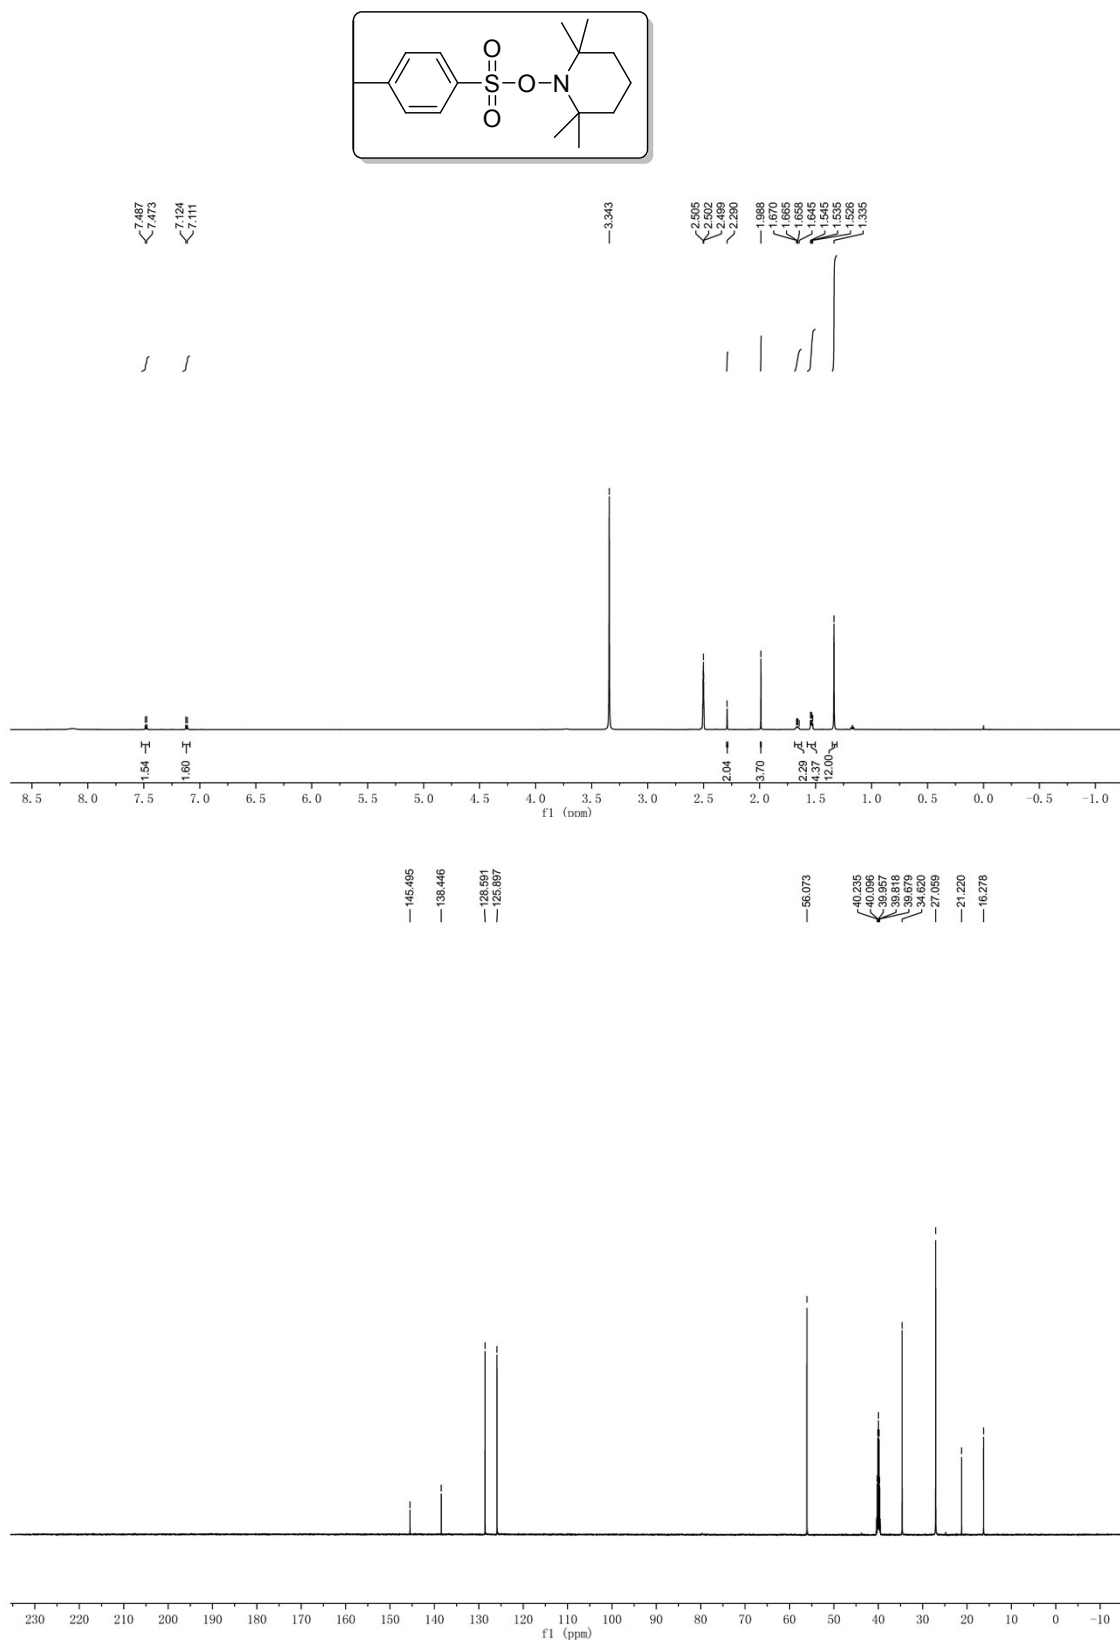

Figure S30. <sup>1</sup>H (600 MHz) and <sup>13</sup>C (151 MHz) NMR spectra of 11 in CDCl<sub>3</sub>.
